# Supplementary material
Source: PubMed Central journal article supplement (PMC7205385)
Supplement: jf9b07706_si_001.pdf [file jf9b07706_si_001.pdf]

# Supporting Information

Evaluation of matrix effects and extraction efficiencies of LC-MS/MS methods  
as the essential part for proper validation of multiclass contaminants in complex feed

David Steiner<sup>1</sup>, Rudolf Krska<sup>2,3</sup>, Alexandra Malachová<sup>1</sup>, Ines Taschl<sup>4</sup>, Michael Sulyok<sup>2</sup>

<sup>1</sup> FFOQSI – Austrian Competence Centre for Feed and Food Quality, Safety & Innovation, Head Office: FFOQSI GmbH, Technopark 1C, A – 3430 Tulln, Austria

<sup>2</sup> University of Natural Resources and Life Sciences, Vienna (BOKU), Institute of Bioanalytics and Agro-Metabolomics,  
Department of Agrobiotechnology IFA-Tulln, Konrad-Lorenz-Str. 20, 3430 Tulln, Austria

<sup>3</sup> Institute for Global Food Security, School of Biological Sciences, Queens University Belfast,  
University Road, Belfast, BT7 1NN, Northern Ireland, United Kingdom

<sup>4</sup> BIOMIN Holding GmbH, Erber Campus 1, 3131 Getzersdorf, Austria

Email address corresponding author

[michael.sulyok@boku.ac.at](mailto:michael.sulyok@boku.ac.at)

## Caption list for Table S1

worksheet 2 "Analytes"

full list of investigated analytes including following information: quantifier/qualifier,  
substance class, polarity, retention, acquisition parameter (q1, q3, DP, CE, CXP)

worksheet 3 "Samples"

compositional information about tested real and model compound feed samples, graphical illustration of model feed samples,  
list of investigated single feed material with origination information

worksheet 4 "real compound feed"

overview on data of RA, SSE, RE and respective RSD values for tested real compound feed samples

worksheet 5 "model compound feed"

overview on data of RA, SSE, RE and respective RSD values for tested model compound feed samples

worksheet 6 "single feed material"

overview on data of RA, SSE, RE and respective RSD values for tested single feed material

worksheet 7 "t-test & F-test statistics"

T-test and F-test statistics for the comparison of model and real compound feed samples

worksheet 8 "RSD Extraction"

relative standard deviations for the extraction protocol for single feed material and model compound feed

worksheet 9 "single technical replicate"

overview on data of RA, SSE, RE and respective RSD values for tested single technical replicate of real cattle feed

## Work Sheet 2 - Analytes

| Supporting Information     | Substance Class   | Polarity | Retention | q1    | q3    | DP   | CE  | CXP |
|----------------------------|-------------------|----------|-----------|-------|-------|------|-----|-----|
| 15-Acetyldeoxynivalenol.1  | fungal metabolite | pos      | 7,1       | 339,1 | 321,2 | 91   | 13  | 18  |
| 15-Acetyldeoxynivalenol.2  |                   | pos      | 7,1       | 339,1 | 137,2 | 91   | 17  | 8   |
| 15-Hydroxyculmorin.1       | fungal metabolite | pos      | 9,9       | 272,2 | 193,2 | 71   | 25  | 12  |
| 15-Hydroxyculmorin.2       |                   | pos      | 9,9       | 272,2 | 237,2 | 71   | 17  | 16  |
| 3-Acetyldeoxynivalenol.1   | fungal metabolite | neg      | 7,2       | 397,3 | 59,2  | -70  | -38 | -8  |
| 3-Acetyldeoxynivalenol.2   |                   | neg      | 7,2       | 397,3 | 307,1 | -70  | -20 | -7  |
| 3-Methylsterigmatocystin.1 | fungal metabolite | pos      | 10,6      | 339,0 | 306,1 | 101  | 39  | 18  |
| 3-Methylsterigmatocystin.2 |                   | pos      | 10,6      | 339,0 | 324,1 | 101  | 33  | 18  |
| 3-Nitropropionic acid      | fungal metabolite | neg      | 2,9       | 118,0 | 46,0  | -65  | -16 | -3  |
| Aflatoxin B1.1             | fungal metabolite | pos      | 8,5       | 313,1 | 285,2 | 106  | 33  | 16  |
| Aflatoxin B1.2             |                   | pos      | 8,5       | 313,1 | 128,1 | 106  | 91  | 10  |
| Aflatoxin B2.1             | fungal metabolite | pos      | 8,2       | 315,1 | 287,2 | 96   | 37  | 18  |
| Aflatoxin B2.2             |                   | pos      | 8,2       | 315,1 | 259,2 | 96   | 43  | 18  |
| Aflatoxin G1.1             | fungal metabolite | pos      | 7,8       | 329,1 | 243,1 | 86   | 39  | 14  |
| Aflatoxin G1.2             |                   | pos      | 7,8       | 329,1 | 200,0 | 86   | 59  | 12  |
| Aflatoxin G2.1             | fungal metabolite | pos      | 7,6       | 331,1 | 313,2 | 111  | 35  | 18  |
| Aflatoxin G2.2             |                   | pos      | 7,6       | 331,1 | 245,2 | 111  | 43  | 14  |
| Aflatoxin M1.1             | fungal metabolite | pos      | 7,6       | 329,1 | 273,2 | 91   | 35  | 16  |
| Aflatoxin M1.2             |                   | pos      | 7,6       | 329,1 | 229,1 | 91   | 59  | 12  |
| Agistatin E.1              | fungal metabolite | neg      | 7,5       | 227,0 | 69,0  | -70  | -32 | -1  |
| Agistatin E.2              |                   | neg      | 7,5       | 227,0 | 73,0  | -70  | -30 | -1  |
| alpha-Zearalenol.1         | fungal metabolite | neg      | 11,4      | 319,2 | 160,1 | -115 | -44 | -13 |
| alpha-Zearalenol.2         |                   | neg      | 11,4      | 319,2 | 130,1 | -115 | -50 | -20 |
| Alternariol.1              | fungal metabolite | neg      | 10,7      | 257,0 | 213,0 | -100 | -34 | -11 |
| Alternariol.2              |                   | neg      | 10,7      | 257,0 | 215,0 | -100 | -36 | -11 |
| Alternariolmethylether.1   | fungal metabolite | neg      | 12,4      | 271,1 | 256,0 | -95  | -32 | -13 |
| Alternariolmethylether.2   |                   | neg      | 12,4      | 271,1 | 227,0 | -95  | -50 | -9  |
| Altersetin.1               | fungal metabolite | neg      | 15,1      | 398,2 | 354,2 | -120 | -32 | -13 |
| Altersetin.2               |                   | neg      | 15,1      | 398,2 | 310,1 | -120 | -34 | -11 |
| Altertoxin-I.1             | fungal metabolite | neg      | 9,8       | 351,1 | 315,0 | -105 | -24 | -7  |
| Altertoxin-I.2             |                   | neg      | 9,8       | 351,1 | 263,2 | -105 | -44 | -11 |
| Amidepsin B.1              | fungal metabolite | neg      | 11,1      | 552,2 | 167,0 | -90  | -18 | -7  |
| Amidepsin B.2              |                   | neg      | 11,1      | 552,2 | 238,1 | -90  | -34 | -9  |
| Andrastin A.1              | fungal metabolite | neg      | 12,6      | 485,2 | 425,2 | -140 | -48 | -11 |
| Andrastin A.2              |                   | neg      | 12,6      | 485,2 | 123,0 | -140 | -82 | -7  |
| Anisomycin.1               | fungal metabolite | pos      | 5,6       | 266,3 | 121,3 | 86   | 33  | 8   |
| Anisomycin.2               |                   | pos      | 5,6       | 266,3 | 78,3  | 86   | 85  | 12  |

Quantifier transition

|                     |                   |     |      |       |       |      |     |     |
|---------------------|-------------------|-----|------|-------|-------|------|-----|-----|
| Asperphenamate.1    | fungal metabolite | neg | 12,4 | 565,2 | 268,1 | -70  | -26 | -9  |
| Asperphenamate.2    |                   | neg | 12,4 | 565,2 | 224,1 | -70  | -48 | -9  |
| Aspon.1             | pesticide         | pos | 14,3 | 378,9 | 115,1 | 81   | 47  | 4   |
| Aspon.2             |                   | pos | 14,3 | 378,9 | 210,9 | 81   | 29  | 4   |
| Atpenin.1           | fungal metabolite | neg | 13,1 | 363,9 | 292,3 | -75  | -22 | -7  |
| Atpenin.2           |                   | neg | 13,1 | 363,9 | 328,1 | -75  | -14 | -7  |
| Averantin.1         | fungal metabolite | neg | 15   | 371,1 | 295,0 | -90  | -56 | -15 |
| Averantin.2         |                   | neg | 15   | 371,1 | 256,0 | -90  | -50 | -13 |
| Averufin.1          | fungal metabolite | neg | 15,7 | 367,0 | 295,1 | -115 | -52 | -11 |
| Averufin.2          |                   | neg | 15,7 | 367,0 | 284,0 | -115 | -44 | -11 |
| Bentazon.1          | pesticide         | neg | 8,82 | 239,1 | 132,0 | -106 | -32 | -10 |
| Bentazon.2          |                   | neg | 8,82 | 239,1 | 197,0 | -106 | -24 | -12 |
| Brevianamid F.1     | fungal metabolite | pos | 7,3  | 284,1 | 130,1 | 86   | 31  | 8   |
| Brevianamid F.2     |                   | pos | 7,3  | 284,1 | 103,1 | 86   | 75  | 16  |
| Carprofen.1         | (veterinary) drug | neg | 12,3 | 272,0 | 226,0 | -70  | -37 | -10 |
| Carprofen.2         |                   | neg | 12,3 | 272,0 | 228,0 | -70  | -17 | -10 |
| Cercosporamide.1    | fungal metabolite | neg | 11,5 | 330,0 | 313,0 | -90  | -26 | -11 |
| Cercosporamide.2    |                   | neg | 11,5 | 330,0 | 246,0 | -90  | -26 | -9  |
| Chetomin.1          | fungal metabolite | pos | 11,7 | 711,2 | 298,2 | 96   | 21  | 18  |
| Chetomin.2          |                   | pos | 11,7 | 711,2 | 348,2 | 96   | 25  | 10  |
| Chloramphenicol.1   | (veterinary) drug | neg | 7,6  | 320,9 | 151,9 | -80  | -24 | -7  |
| Chloramphenicol.2   |                   | neg | 7,6  | 320,9 | 256,9 | -80  | -18 | -13 |
| Cladosporin.1       | fungal metabolite | neg | 10,6 | 291,0 | 247,1 | -145 | -34 | -9  |
| Cladosporin.2       |                   | neg | 10,6 | 291,0 | 146,9 | -145 | -50 | -15 |
| Curvularin.1        | fungal metabolite | neg | 9,4  | 291,1 | 122,9 | -90  | -38 | -7  |
| Curvularin.2        |                   | neg | 9,4  | 291,1 | 189,9 | -90  | -40 | -9  |
| Cyclophenin.1       | fungal metabolite | pos | 8,3  | 295,1 | 146,1 | 71   | 33  | 12  |
| Cyclophenin.2       |                   | pos | 8,3  | 295,1 | 177,0 | 71   | 19  | 10  |
| Cylindrocarpon A4.1 | fungal metabolite | neg | 14,9 | 505,1 | 403,1 | -65  | -30 | -15 |
| Cylindrocarpon A4.2 |                   | neg | 14,9 | 505,1 | 209,0 | -65  | -60 | -9  |
| Cyromazine.1        | pesticide         | pos | 2,6  | 167,1 | 85,1  | 82   | 27  | 15  |
| Cyromazine.2        |                   | pos | 2,6  | 167,1 | 125,1 | 82   | 27  | 8   |
| Cytochalasin B.1    | fungal metabolite | pos | 10,1 | 480,2 | 462,2 | 81   | 23  | 10  |
| Cytochalasin B.2    |                   | pos | 10,1 | 480,2 | 444,2 | 81   | 23  | 12  |
| Cytochalasin J.1    | fungal metabolite | pos | 9,4  | 452,2 | 416,2 | 61   | 21  | 12  |
| Cytochalasin J.2    |                   | pos | 9,4  | 452,2 | 434,2 | 61   | 13  | 12  |
| Deoxynivalenol.1    | fungal metabolite | neg | 5,8  | 355,1 | 265,2 | -70  | -22 | -13 |
| Deoxynivalenol.2    |                   | neg | 5,8  | 355,1 | 59,2  | -70  | -40 | -8  |

Quantifier transition

|                      |                   |     |       |       |       |      |     |     |
|----------------------|-------------------|-----|-------|-------|-------|------|-----|-----|
| Destruxin A.1        | fungal metabolite | pos | 10,3  | 578,0 | 437,2 | 156  | 39  | 16  |
| Destruxin A.2        |                   | pos | 10,3  | 578,0 | 178,0 | 156  | 51  | 8   |
| Diacetoxyscirpenol.1 | fungal metabolite | pos | 8,2   | 384,2 | 307,2 | 81   | 17  | 9   |
| Diacetoxyscirpenol.2 |                   | pos | 8,2   | 384,2 | 105,1 | 81   | 61  | 7   |
| Dihydrocitrinone.1   | fungal metabolite | neg | 10    | 265,0 | 221,0 | -25  | -28 | -9  |
| Dihydrocitrinone.2   |                   | neg | 10    | 265,0 | 177,0 | -25  | -34 | -7  |
| Dinoseb.1            | pesticide         | neg | 12,61 | 239,1 | 134,0 | -94  | -52 | -10 |
| Dinoseb.2            |                   | neg | 12,61 | 239,1 | 193,0 | -94  | -30 | -12 |
| Dithiopyr.1          | pesticide         | pos | 13,2  | 402,1 | 353,9 | 91   | 23  | 4   |
| Dithiopyr.2          |                   | pos | 13,2  | 402,1 | 272,1 | 91   | 38  | 4   |
| Emodin.1             | fungal metabolite | neg | 14    | 269,0 | 224,9 | -100 | -38 | -11 |
| Emodin.2             |                   | neg | 14    | 269,0 | 240,9 | -100 | -38 | -13 |
| Enniatin A1.1        | fungal metabolite | pos | 14,2  | 685,4 | 210,1 | 96   | 41  | 8   |
| Enniatin A1.2        |                   | pos | 14,2  | 685,4 | 228,2 | 96   | 49  | 20  |
| Equisetin.1          | fungal metabolite | neg | 14,7  | 372,2 | 342,2 | -110 | -34 | -7  |
| Equisetin.2          |                   | neg | 14,7  | 372,2 | 124,0 | -110 | -66 | -7  |
| Ergine.1             | fungal metabolite | pos | 5     | 268,1 | 223,2 | 86   | 29  | 14  |
| Ergine.2             |                   | pos | 5     | 268,1 | 208,2 | 86   | 35  | 10  |
| Ergocristine.1       | fungal metabolite | pos | 8,2   | 610,4 | 223,3 | 86   | 47  | 12  |
| Ergocristine.2       |                   | pos | 8,2   | 610,4 | 592,3 | 86   | 21  | 18  |
| Ethirimol.1          | pesticide         | pos | 7,7   | 210,2 | 98,1  | 96   | 37  | 6   |
| Ethirimol.2          |                   | pos | 7,7   | 210,2 | 140,0 | 96   | 31  | 8   |
| Florfenicol.1        | (veterinary) drug | neg | 15    | 356,2 | 336,1 | -122 | -13 | -10 |
| Florfenicol.2        |                   | neg | 15    | 356,2 | 184,9 | -118 | -25 | -10 |
| Fluazinam.1          | pesticide         | neg | 13,66 | 462,9 | 415,8 | -59  | -24 | -26 |
| Fluazinam.2          |                   | neg | 13,66 | 462,9 | 397,9 | -59  | -20 | -24 |
| Flumethasone.1       | (veterinary) drug | neg | 9,6   | 379,0 | 305,0 | -188 | -34 | -12 |
| Flumethasone.2       |                   | neg | 9,6   | 379,0 | 325,0 | -188 | -24 | -12 |
| Fumigaclavine C.1    | fungal metabolite | pos | 6,9   | 367,1 | 307,1 | 91   | 33  | 10  |
| Fumigaclavine C.2    |                   | pos | 6,9   | 367,1 | 192,1 | 91   | 51  | 10  |
| Fumiquinazolin A.1   | fungal metabolite | neg | 10,1  | 444,2 | 242,1 | -135 | -36 | -9  |
| Fumiquinazolin A.2   |                   | neg | 10,1  | 444,2 | 145,1 | -135 | -56 | -7  |
| Fumonisin B1.1       | fungal metabolite | pos | 9,3   | 722,5 | 334,4 | 121  | 57  | 4   |
| Fumonisin B1.2       |                   | pos | 9,3   | 722,5 | 352,3 | 121  | 55  | 12  |
| Fumonisin B2.1       | fungal metabolite | pos | 11,1  | 706,5 | 336,4 | 126  | 59  | 8   |
| Fumonisin B2.2       |                   | pos | 11,1  | 706,5 | 318,4 | 126  | 51  | 2   |
| Fungerin.1           | fungal metabolite | pos | 8,3   | 235,1 | 161,1 | 61   | 25  | 10  |
| Fungerin.2           |                   | pos | 8,3   | 235,1 | 203,1 | 61   | 23  | 10  |

Quantifier transition

|                        |                   |     |      |       |       |      |     |     |
|------------------------|-------------------|-----|------|-------|-------|------|-----|-----|
| Fusarenon-X.1          | fungal metabolite | neg | 6,4  | 413,2 | 59,1  | -70  | -44 | -9  |
| Fusarenon-X.2          |                   | neg | 6,4  | 413,2 | 263,0 | -70  | -22 | -16 |
| Gibberellic acid.1     | fungal metabolite | neg | 7,1  | 345,2 | 143,1 | -85  | -50 | -10 |
| Gibberellic acid.2     |                   | neg | 7,1  | 345,2 | 239,2 | -85  | -20 | -10 |
| Gliotoxin.1            | fungal metabolite | pos | 8,6  | 327,1 | 263,2 | 61   | 15  | 16  |
| Gliotoxin.2            |                   | pos | 8,6  | 327,1 | 245,3 | 61   | 25  | 20  |
| Griseofulvin.1         | fungal metabolite | pos | 9,6  | 353,2 | 165,2 | 81   | 27  | 10  |
| Griseofulvin.2         |                   | pos | 9,6  | 353,2 | 215,2 | 81   | 27  | 12  |
| Herquiline A.1         | fungal metabolite | pos | 5,5  | 315,1 | 205,1 | 61   | 35  | 8   |
| Herquiline A.2         |                   | pos | 5,5  | 315,1 | 149,1 | 61   | 43  | 12  |
| HT-2 toxin.1           | fungal metabolite | pos | 9,3  | 442,2 | 263,1 | 76   | 21  | 19  |
| HT-2 toxin.2           |                   | pos | 9,3  | 447,4 | 345,1 | 131  | 27  | 20  |
| Illicicolin A.1        | fungal metabolite | neg | 16,1 | 389,2 | 201,0 | -65  | -48 | -9  |
| Illicicolin A.2        |                   | neg | 16,1 | 389,2 | 216,1 | -65  | -38 | -9  |
| Lotaustralin.1         | fungal metabolite | neg | 5,3  | 320,1 | 161,0 | -40  | -22 | -17 |
| Lotaustralin.2         |                   | neg | 5,3  | 320,1 | 188,0 | -40  | -16 | -7  |
| Macrosporin.1          | fungal metabolite | neg | 13,6 | 283,0 | 268,1 | -95  | -34 | -1  |
| Macrosporin.2          |                   | neg | 13,6 | 283,0 | 225,0 | -95  | -50 | -19 |
| Malformin C.1          | fungal metabolite | neg | 11,6 | 528,3 | 494,2 | -125 | -26 | -13 |
| Malformin C.2          |                   | neg | 11,6 | 528,3 | 140,8 | -125 | -42 | -1  |
| Mefenamic acid.1       | (veterinary) drug | neg | 13,4 | 240,0 | 196,0 | -80  | -28 | -10 |
| Mefenamic acid.2       |                   | neg | 13,4 | 240,0 | 192,0 | -80  | -35 | -10 |
| Meleagrín.1            | fungal metabolite | neg | 7,5  | 432,1 | 332,1 | -75  | -23 | -13 |
| Meleagrín.2            |                   | neg | 7,5  | 432,1 | 177,1 | -75  | -35 | -7  |
| Moniliformin           | fungal metabolite | neg | 3,3  | 96,9  | 41,2  | -100 | -24 | -5  |
| Monoacetoxyscirpenol.1 | fungal metabolite | pos | 7,5  | 342,2 | 265,1 | 71   | 13  | 26  |
| Monoacetoxyscirpenol.2 |                   | pos | 7,5  | 342,2 | 307,2 | 71   | 13  | 8   |
| Mycophenolic acid.1    | fungal metabolite | pos | 10,2 | 338,1 | 207,2 | 61   | 33  | 16  |
| Mycophenolic acid.2    |                   | pos | 10,2 | 338,1 | 303,2 | 61   | 19  | 18  |
| Neosolaniol.1          | fungal metabolite | pos | 6,5  | 400,2 | 215,0 | 76   | 25  | 12  |
| Neosolaniol.2          |                   | pos | 6,5  | 400,2 | 185,0 | 76   | 29  | 14  |
| Nivalenol.1            | fungal metabolite | neg | 4,8  | 371,1 | 281,1 | -75  | -22 | -15 |
| Nivalenol.2            |                   | neg | 4,8  | 371,1 | 59,1  | -75  | -42 | -7  |
| Norsolorinic acid.1    | fungal metabolite | neg | 16,6 | 369,1 | 308,1 | -100 | -40 | -19 |
| Norsolorinic acid.2    |                   | neg | 16,6 | 369,1 | 242,0 | -100 | -40 | -19 |
| Novaluron.1            | pesticide         | neg | 13,2 | 491,1 | 470,7 | -105 | -22 | -4  |
| Novaluron.2            |                   | neg | 13,2 | 493,1 | 472,7 | -100 | -22 | -4  |
| Ochratoxin A.1         | fungal metabolite | pos | 11,7 | 404,0 | 239,0 | 91   | 37  | 16  |
| Ochratoxin A.2         |                   | pos | 11,7 | 404,0 | 102,0 | 91   | 105 | 14  |

Quantifier transition

|                    |                   |     |      |       |       |      |     |     |
|--------------------|-------------------|-----|------|-------|-------|------|-----|-----|
| Ochratoxin B.1     | fungal metabolite | pos | 10,4 | 370,1 | 205,0 | 86   | 33  | 12  |
| Ochratoxin B.2     |                   | pos | 10,4 | 370,1 | 103,1 | 86   | 77  | 16  |
| Penitrem A.1       | fungal metabolite | pos | 13,2 | 634,3 | 558,3 | 81   | 27  | 16  |
| Penitrem A.2       |                   | pos | 13,2 | 634,3 | 616,3 | 81   | 17  | 10  |
| Permethrin.1       | pesticide         | pos | 15,4 | 408,1 | 183,1 | 86   | 25  | 10  |
| Permethrin.2       |                   | pos | 15,4 | 408,1 | 153,1 | 86   | 63  | 8   |
| Phomalone.1        | fungal metabolite | neg | 10,7 | 253,0 | 205,0 | -65  | -36 | -9  |
| Phomalone.2        |                   | neg | 10,7 | 253,0 | 208,0 | -65  | -28 | -19 |
| Pinsel.1           | fungal metabolite | neg | 11,5 | 299,0 | 267,0 | -65  | -28 | -11 |
| Pinsel.2           |                   | neg | 11,5 | 299,0 | 141,0 | -65  | -56 | -7  |
| Prometon.1         | pesticide         | pos | 9,5  | 226,1 | 142,0 | 71   | 29  | 8   |
| Prometon.2         |                   | pos | 9,5  | 226,1 | 184,3 | 71   | 23  | 8   |
| Pseurotin A.1      | fungal metabolite | neg | 8,2  | 430,1 | 270,0 | -65  | -14 | -5  |
| Pseurotin A.2      |                   | neg | 8,2  | 430,1 | 308,0 | -65  | -12 | -7  |
| Questiomycin A.1   | fungal metabolite | pos | 8,6  | 213,0 | 156,0 | 96   | 35  | 10  |
| Questiomycin A.2   |                   | pos | 8,6  | 213,0 | 127,0 | 96   | 43  | 8   |
| Quinolactacin A.1  | fungal metabolite | pos | 7,3  | 271,2 | 214,1 | 61   | 37  | 8   |
| Quinolactacin A.2  |                   | pos | 7,3  | 271,2 | 199,1 | 61   | 51  | 8   |
| Rofecoxib.1        | (veterinary) drug | pos | 8,1  | 315,0 | 189,0 | 146  | 73  | 8   |
| Rofecoxib.2        |                   | pos | 8,1  | 315,0 | 269,0 | 146  | 29  | 10  |
| Roquefortine C.1   | fungal metabolite | pos | 8,6  | 390,2 | 193,2 | 91   | 39  | 10  |
| Roquefortine C.2   |                   | pos | 8,6  | 390,2 | 322,2 | 91   | 29  | 18  |
| Secalonic acid D.1 | fungal metabolite | pos | 12,8 | 639,2 | 561,2 | 121  | 37  | 8   |
| Secalonic acid D.2 |                   | pos | 12,8 | 639,2 | 589,2 | 121  | 33  | 8   |
| Sterigmatocystin.1 | fungal metabolite | pos | 11,9 | 325,1 | 310,2 | 96   | 35  | 18  |
| Sterigmatocystin.2 |                   | pos | 11,9 | 325,1 | 281,1 | 96   | 51  | 16  |
| Sulfamethoxazole.1 | (veterinary) drug | pos | 6,5  | 254,3 | 156,0 | 54   | 21  | 10  |
| Sulfamethoxazole.2 |                   | pos | 6,5  | 254,3 | 92,0  | 54   | 38  | 10  |
| Sulfoxaflor.1      | pesticide         | neg | 7,17 | 276,0 | 213,0 | -56  | -23 | -10 |
| Sulfoxaflor.2      |                   | neg | 7,17 | 276,0 | 212,0 | -56  | -23 | -10 |
| Sulochrin.1        | fungal metabolite | pos | 8,2  | 333,2 | 209,1 | 56   | 17  | 12  |
| Sulochrin.2        |                   | pos | 8,2  | 333,2 | 136,2 | 56   | 59  | 8   |
| T-2 toxin.1        | fungal metabolite | pos | 10,2 | 484,3 | 215,2 | 56   | 29  | 18  |
| T-2 toxin.2        |                   | pos | 10,2 | 484,3 | 185,1 | 56   | 31  | 11  |
| Ternatin.1         | fungal metabolite | neg | 12,7 | 736,4 | 664,4 | -195 | -36 | -25 |
| Ternatin.2         |                   | neg | 12,7 | 736,4 | 197,1 | -195 | -60 | -9  |
| Thielavin B.1      | fungal metabolite | neg | 14   | 565,2 | 163,0 | -55  | -30 | -7  |
| Thielavin B.2      |                   | neg | 14   | 565,2 | 209,1 | -55  | -28 | -9  |

Quantifier transition

|                  |                   |     |      |       |       |      |     |     |
|------------------|-------------------|-----|------|-------|-------|------|-----|-----|
| Tiamulin.1       | (veterinary) drug | pos | 7,6  | 494,9 | 192,0 | 100  | 17  | 12  |
| Tiamulin.2       |                   | pos | 7,6  | 494,9 | 119,0 | 100  | 35  | 12  |
| Tilmicosin.1     | (veterinary) drug | pos | 6,5  | 870,1 | 88,0  | 100  | 124 | 15  |
| Tilmicosin.2     |                   | pos | 6,5  | 870,1 | 174,0 | 100  | 57  | 15  |
| Versicolorin A.1 | fungal metabolite | neg | 13,7 | 337,1 | 309,1 | -80  | -35 | -10 |
| Versicolorin A.2 |                   | neg | 13,7 | 337,1 | 252,0 | -80  | -45 | -10 |
| Zearalenone.1    | fungal metabolite | neg | 11,5 | 317,1 | 131,1 | -110 | -42 | -8  |
| Zearalenone.2    |                   | neg | 11,5 | 317,1 | 175,0 | -110 | -34 | -13 |

**Quantifier transition**





model cattle feed samples

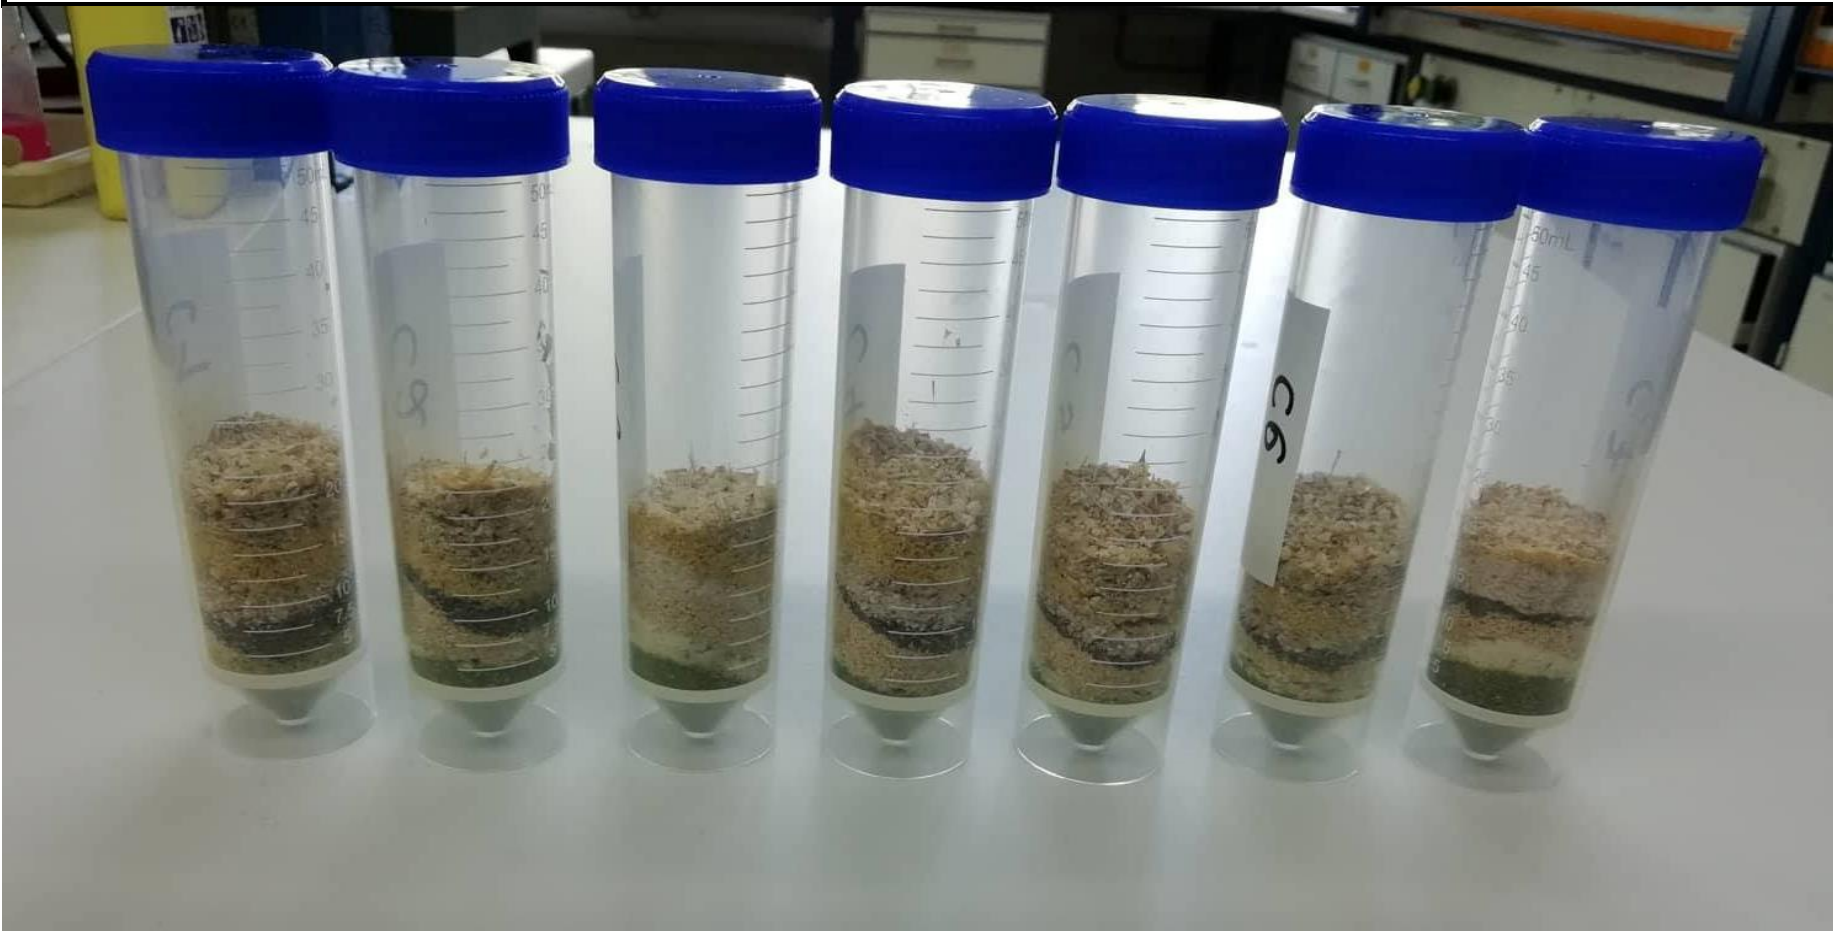



model pig feed samples

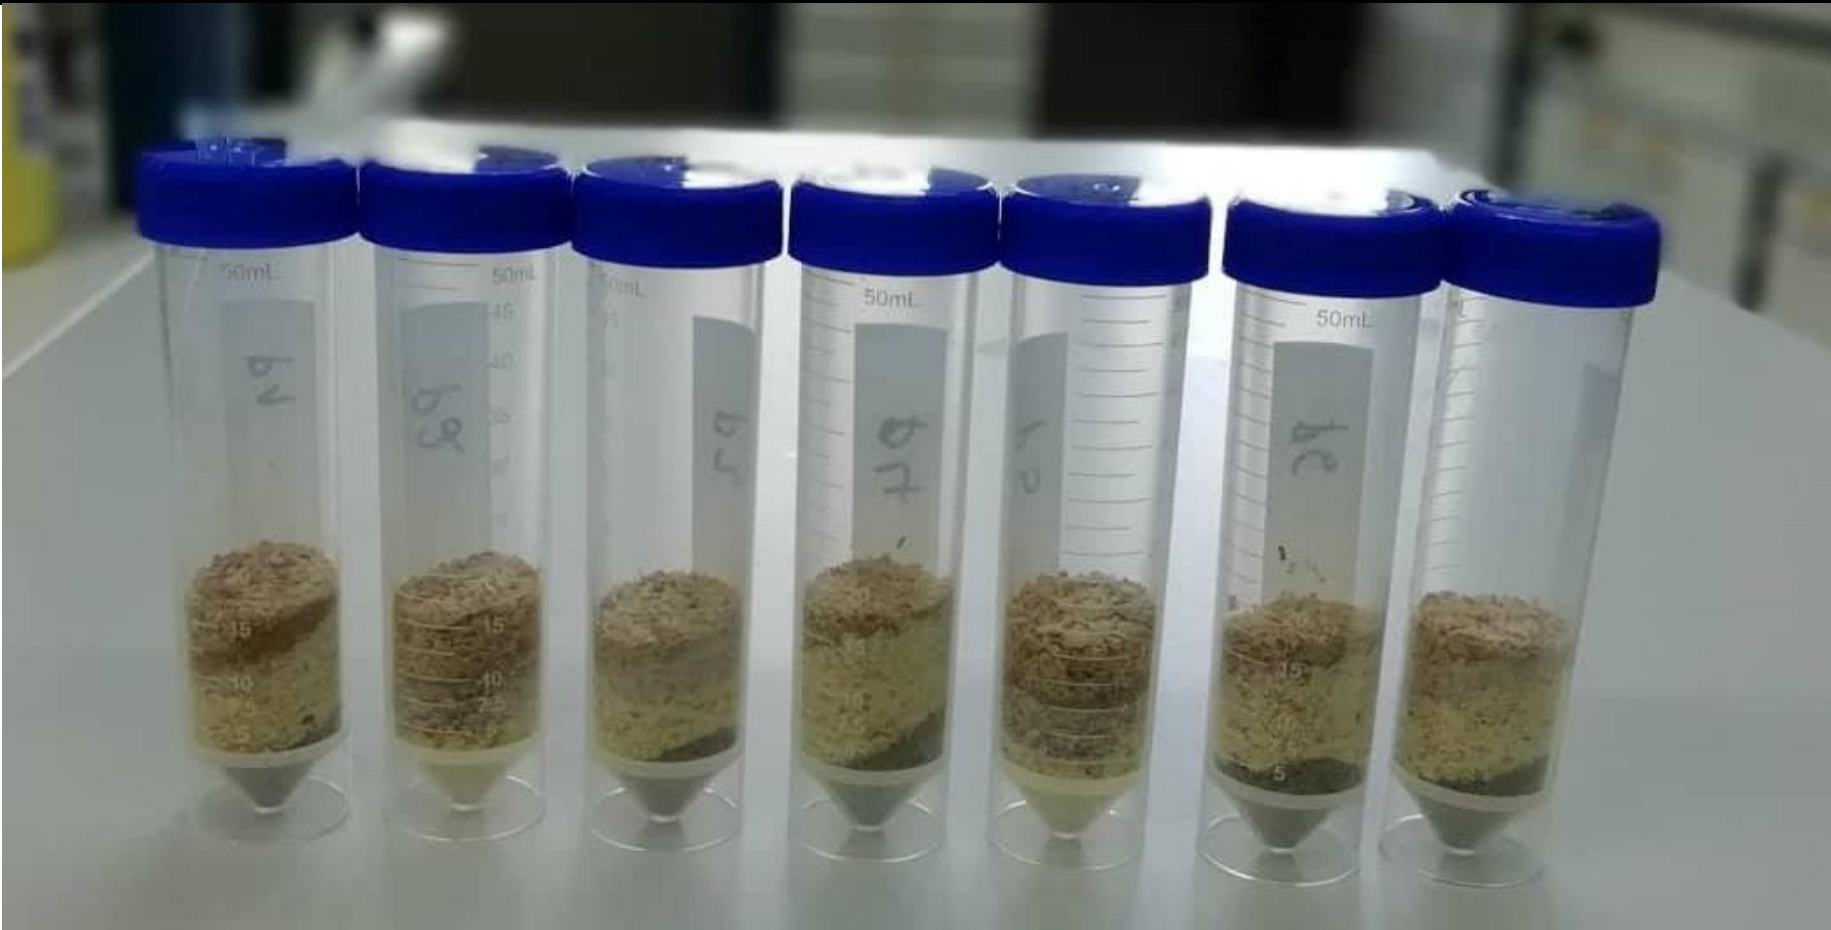



**model chicken feed samples**

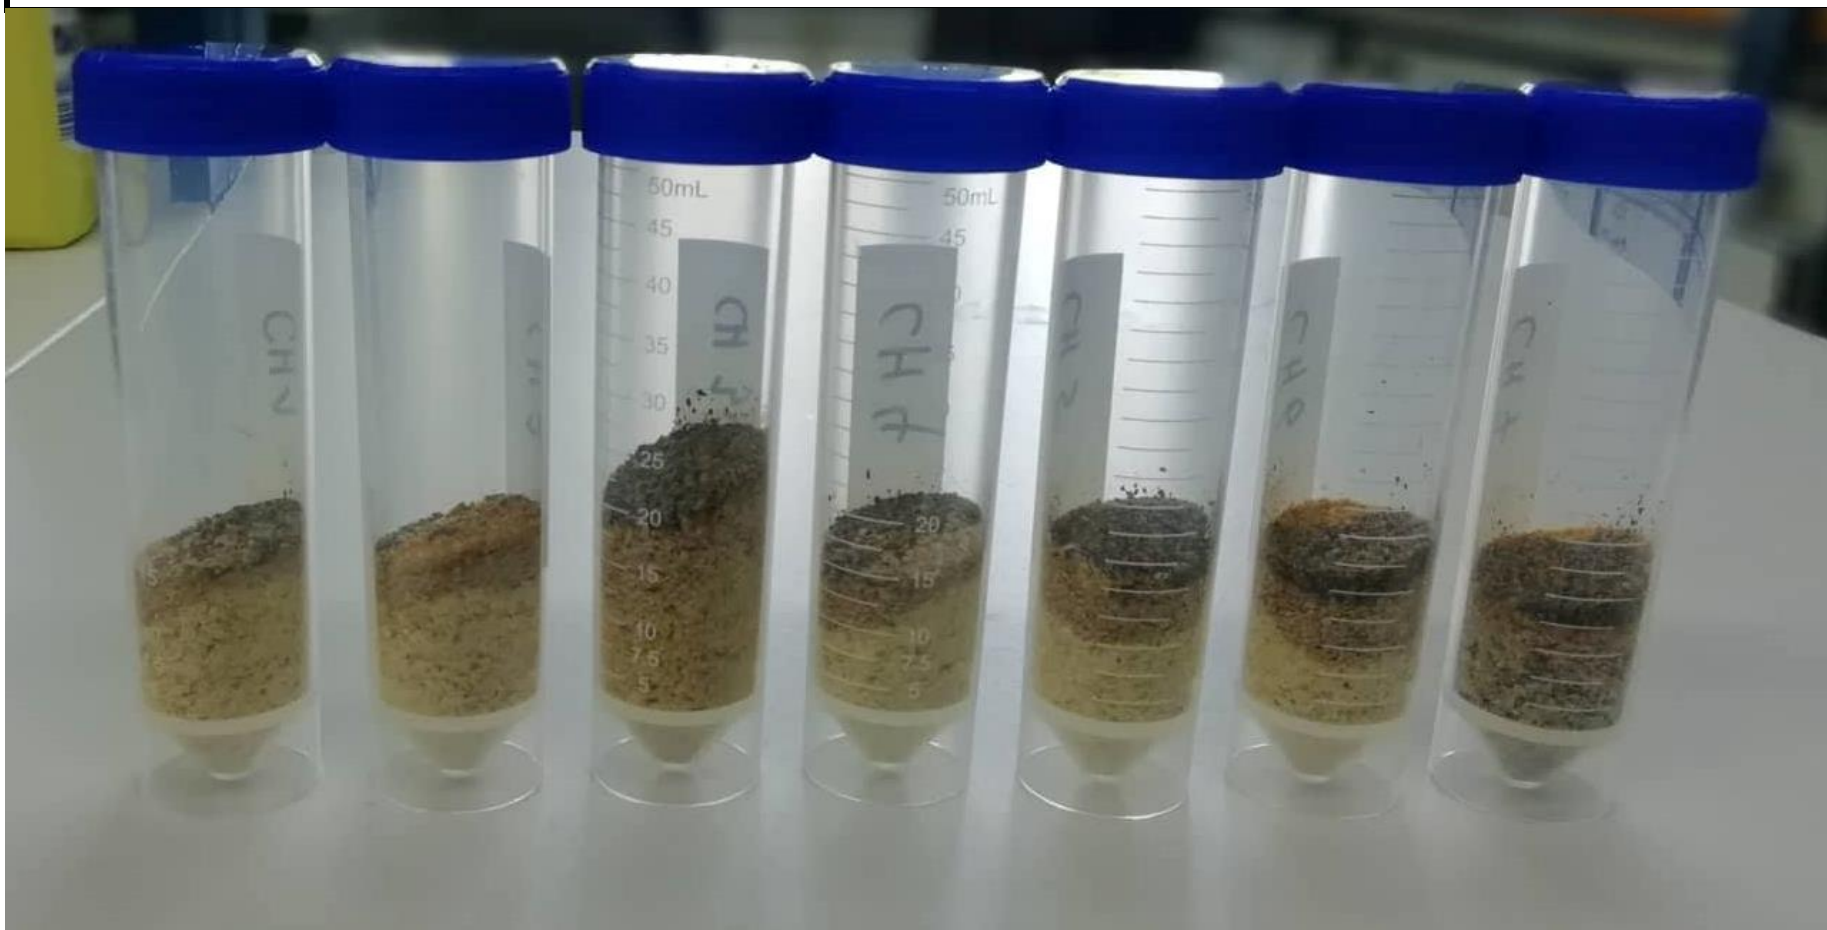

| sample type            | origin                             |
|------------------------|------------------------------------|
| <b>alfalfa</b>         | BIOMIN GmbH, Garant GmbH           |
| <b>barley</b>          | BIOMIN GmbH, LVA GmbH, Garant GmbH |
| <b>horse beans</b>     | Bipea                              |
| <b>maize</b>           | BIOMIN GmbH, LVA GmbH              |
| <b>DDGS*</b>           | BIOMIN GmbH                        |
| <b>rapeseed</b>        | BIOMIN GmbH, Garant GmbH           |
| <b>silage</b>          | BIOMIN GmbH                        |
| <b>soy</b>             | BIOMIN GmbH, LVA GmbH              |
| <b>sunflower cake</b>  | LVA GmbH                           |
| <b>triticale</b>       | BIOMIN GmbH, Romer Labs GmbH       |
| <b>wheat</b>           | BIOMIN GmbH, LVA GmbH, Garant GmbH |
| <b>wheat bran</b>      | BIOMIN GmbH, Garant GmbH           |
| <b>cattle (real)</b>   | LVA GmbH                           |
| <b>cattle (model)</b>  | in-house                           |
| <b>chicken (real)</b>  | BIOMIN GmbH                        |
| <b>chicken (model)</b> | in-house                           |
| <b>pig (real)</b>      | BIOMIN GmbH                        |
| <b>pig (model)</b>     | in-house                           |

\*Distiller's Dried Grains with Solubles

### Work Sheet 4 - real compound feed

| Supporting Information     | ESI-mode | Cattle |         |       |           |      | Pig  |         |       |           |      | Chicken |         |       |           |      |
|----------------------------|----------|--------|---------|-------|-----------|------|------|---------|-------|-----------|------|---------|---------|-------|-----------|------|
|                            |          | RA %   | RA RSD% | SSE % | SSE RSD % | RE % | RA % | RA RSD% | SSE % | SSE RSD % | RE % | RA %    | RA RSD% | SSE % | SSE RSD % | RE % |
| 15-Acetyldeoxynivalenol    | pos      | 55     | 10      | 69    | 15        | 80   | 92   | 8       | 100   | 13        | 92   | 74      | 17      | 83    | 14        | 89   |
| 15-Hydroxyculmorin         | pos      | 76     | 13      | 89    | 13        | 86   | 107  | 5       | 107   | 17        | 100  | 111     | 8       | 121   | 11        | 92   |
| 3-Acetyldeoxynivalenol     | neg      | 40     | 19      | 43    | 10        | 93   | 57   | 14      | 63    | 16        | 90   | 49      | 15      | 57    | 16        | 86   |
| 3-Methylsterigmatocystin   | pos      | 45     | 11      | 49    | 14        | 94   | 59   | 6       | 65    | 9         | 91   | 66      | 3       | 67    | 6         | 98   |
| 3-Nitropropionic Acid      | neg      | 54     | 18      | 66    | 17        | 82   | 69   | 19      | 83    | 16        | 83   | 56      | 14      | 77    | 17        | 73   |
| Aflatoxin B1               | pos      | 46     | 11      | 49    | 14        | 94   | 48   | 19      | 52    | 18        | 91   | 42      | 12      | 43    | 11        | 98   |
| Aflatoxin B2               | pos      | 42     | 15      | 46    | 16        | 92   | 53   | 12      | 53    | 11        | 99   | 52      | 5       | 52    | 6         | 100  |
| Aflatoxin G1               | pos      | 49     | 8       | 50    | 15        | 98   | 53   | 14      | 55    | 18        | 96   | 52      | 3       | 52    | 4         | 99   |
| Aflatoxin G2               | pos      | 46     | 14      | 46    | 14        | 100  | 56   | 17      | 57    | 11        | 98   | 57      | 5       | 57    | 8         | 99   |
| Aflatoxin M1               | pos      | 66     | 11      | 70    | 10        | 94   | 79   | 14      | 82    | 14        | 97   | 79      | 6       | 87    | 8         | 90   |
| Agistatin E                | neg      | 61     | 7       | 65    | 6         | 94   | 59   | 11      | 71    | 9         | 84   | 59      | 5       | 72    | 4         | 82   |
| alpha-Zearalenol           | neg      | 44     | 17      | 51    | 18        | 86   | 47   | 15      | 55    | 18        | 85   | 48      | 8       | 53    | 12        | 91   |
| Alternariol                | neg      | 46     | 16      | 62    | 20        | 74   | 48   | 19      | 55    | 19        | 86   | 49      | 18      | 49    | 18        | 99   |
| Alternariolmonomethylether | neg      | 52     | 19      | 56    | 16        | 92   | 75   | 17      | 83    | 19        | 90   | 83      | 14      | 84    | 15        | 98   |
| Altersetin                 | neg      | 237    | 30      | 255   | 26        | 93   | 220  | 17      | 243   | 16        | 91   | 247     | 19      | 251   | 7         | 98   |
| Altertoxin-I               | neg      | 48     | 25      | 51    | 31        | 95   | 67   | 7       | 76    | 10        | 87   | 67      | 8       | 69    | 14        | 98   |
| Amidepsin B                | neg      | 102    | 8       | 106   | 11        | 96   | 108  | 23      | 108   | 21        | 99   | 174     | 14      | 187   | 13        | 93   |
| Andrastin A                | neg      | 58     | 14      | 105   | 8         | 55   | 63   | 19      | 115   | 8         | 55   | 69      | 11      | 109   | 9         | 63   |
| Anisomycin                 | pos      | 52     | 23      | 53    | 21        | 98   | 55   | 19      | 58    | 16        | 95   | 51      | 19      | 51    | 19        | 100  |
| Asperphenamate             | neg      | 66     | 15      | 73    | 16        | 90   | 78   | 13      | 82    | 18        | 95   | 82      | 13      | 99    | 14        | 83   |
| Aspon                      | pos      | 74     | 9       | 90    | 9         | 82   | 78   | 8       | 87    | 6         | 90   | 79      | 5       | 95    | 3         | 83   |
| Averantin                  | neg      | 84     | 15      | 89    | 10        | 95   | 77   | 14      | 78    | 10        | 99   | 60      | 14      | 63    | 20        | 96   |
| Averufin                   | neg      | 52     | 32      | 60    | 34        | 87   | 71   | 22      | 78    | 21        | 91   | 75      | 6       | 79    | 6         | 94   |
| Ochratoxin B               | neg      | 63     | 32      | 64    | 33        | 99   | 79   | 5       | 82    | 7         | 96   | 86      | 8       | 87    | 7         | 99   |
| Bentazon                   | neg      | 81     | 13      | 86    | 14        | 94   | 107  | 10      | 110   | 9         | 97   | 113     | 10      | 115   | 12        | 98   |
| Brevianamid F              | pos      | 26     | 17      | 33    | 19        | 80   | 49   | 18      | 49    | 20        | 99   | 40      | 8       | 43    | 10        | 93   |
| Carprofen                  | neg      | 103    | 6       | 129   | 9         | 80   | 115  | 5       | 125   | 5         | 92   | 109     | 19      | 109   | 19        | 100  |
| Cercosporamide             | neg      | 85     | 39      | 92    | 31        | 93   | 123  | 15      | 126   | 15        | 98   | 134     | 11      | 139   | 5         | 97   |
| Chetomin                   | pos      | 35     | 26      | 53    | 13        | 66   | 33   | 20      | 63    | 5         | 51   | 22      | 41      | 58    | 8         | 38   |



|                    |     |     |    |     |    |     |     |    |     |    |     |     |    |     |    |     |
|--------------------|-----|-----|----|-----|----|-----|-----|----|-----|----|-----|-----|----|-----|----|-----|
| Chloramphenicol    | neg | 52  | 18 | 58  | 18 | 89  | 59  | 20 | 68  | 19 | 87  | 58  | 14 | 63  | 9  | 93  |
| Cylindrocapon A4   | neg | 101 | 16 | 110 | 14 | 92  | 113 | 11 | 117 | 10 | 97  | 107 | 8  | 108 | 10 | 99  |
| Illicicolin A      | neg | 44  | 25 | 68  | 20 | 64  | 62  | 23 | 87  | 13 | 71  | 64  | 11 | 89  | 7  | 72  |
| Curvularin         | pos | 75  | 19 | 81  | 16 | 92  | 95  | 8  | 99  | 7  | 96  | 101 | 6  | 102 | 4  | 99  |
| Atpenin            | neg | 77  | 21 | 90  | 18 | 85  | 92  | 11 | 100 | 11 | 93  | 99  | 5  | 106 | 6  | 94  |
| Cyclophenin        | pos | 57  | 11 | 59  | 10 | 97  | 63  | 12 | 67  | 16 | 95  | 60  | 7  | 61  | 6  | 98  |
| Cyromazin          | pos | 47  | 14 | 77  | 10 | 60  | 73  | 13 | 91  | 10 | 80  | 55  | 7  | 97  | 13 | 57  |
| Cytochalasin B     | pos | 53  | 14 | 56  | 14 | 95  | 62  | 6  | 67  | 3  | 93  | 60  | 8  | 63  | 11 | 95  |
| Cytochalasin J     | neg | 46  | 18 | 51  | 15 | 90  | 59  | 14 | 60  | 10 | 97  | 62  | 11 | 62  | 14 | 100 |
| Deoxynivalenol     | pos | 103 | 9  | 105 | 11 | 98  | 102 | 15 | 105 | 16 | 97  | 93  | 44 | 108 | 12 | 86  |
| Destruxin A        | pos | 61  | 17 | 65  | 20 | 94  | 66  | 11 | 69  | 5  | 95  | 63  | 8  | 64  | 6  | 98  |
| Diacetoxyscirpenol | neg | 79  | 7  | 80  | 6  | 99  | 77  | 2  | 81  | 8  | 95  | 79  | 6  | 80  | 9  | 100 |
| Dihydrocitrinone   | neg | 170 | 12 | 195 | 12 | 88  | 165 | 14 | 167 | 14 | 99  | 223 | 10 | 224 | 9  | 100 |
| Dinoseb            | pos | 112 | 8  | 116 | 9  | 96  | 115 | 9  | 122 | 8  | 95  | 120 | 7  | 131 | 3  | 91  |
| Dithiopyr          | neg | 84  | 8  | 85  | 11 | 98  | 95  | 18 | 95  | 14 | 99  | 89  | 5  | 90  | 10 | 99  |
| Emodin             | pos | 93  | 21 | 93  | 30 | 100 | 84  | 18 | 91  | 12 | 93  | 83  | 7  | 86  | 7  | 96  |
| Enniatin A1        | neg | 87  | 7  | 96  | 15 | 90  | 84  | 11 | 85  | 13 | 100 | 72  | 18 | 84  | 8  | 86  |
| Equisetin          | pos | 209 | 18 | 229 | 13 | 91  | 237 | 14 | 251 | 18 | 94  | 270 | 19 | 314 | 9  | 86  |
| Ergine             | pos | 47  | 20 | 61  | 26 | 76  | 84  | 16 | 99  | 9  | 85  | 88  | 13 | 92  | 15 | 96  |
| Ergocristine       | pos | 56  | 15 | 61  | 28 | 92  | 63  | 16 | 75  | 17 | 84  | 59  | 6  | 70  | 18 | 84  |
| Ethirimol          | neg | 73  | 5  | 79  | 9  | 92  | 83  | 9  | 89  | 11 | 93  | 84  | 4  | 86  | 5  | 99  |
| Florfenicol        | neg | 56  | 20 | 61  | 14 | 92  | 64  | 23 | 65  | 30 | 99  | 42  | 15 | 43  | 13 | 98  |
| Fluazinam          | neg | 116 | 4  | 128 | 6  | 90  | 114 | 5  | 131 | 2  | 88  | 106 | 10 | 129 | 3  | 82  |
| Flumetasone        | pos | 79  | 12 | 83  | 8  | 95  | 84  | 7  | 89  | 7  | 94  | 87  | 9  | 89  | 8  | 98  |
| Fumigaclavine C    | neg | 67  | 20 | 67  | 17 | 99  | 81  | 10 | 85  | 8  | 96  | 76  | 4  | 81  | 5  | 93  |
| Fumiquinazolin A   | pos | 79  | 18 | 86  | 20 | 92  | 111 | 12 | 114 | 5  | 97  | 123 | 5  | 126 | 7  | 97  |
| Fumonisin B1       | pos | 73  | 11 | 86  | 7  | 85  | 61  | 14 | 63  | 12 | 97  | 66  | 10 | 69  | 14 | 96  |
| Fumonisin B2       | pos | 72  | 6  | 78  | 11 | 93  | 73  | 15 | 77  | 16 | 96  | 67  | 19 | 71  | 19 | 95  |
| Fungerin           | neg | 60  | 16 | 76  | 15 | 79  | 90  | 8  | 91  | 7  | 99  | 82  | 11 | 84  | 5  | 98  |
| Fusarenon X        | neg | 117 | 19 | 122 | 14 | 96  | 111 | 10 | 114 | 9  | 98  | 100 | 10 | 113 | 13 | 89  |
| Gibberellic Acid   | pos | 102 | 12 | 129 | 7  | 79  | 132 | 8  | 148 | 8  | 89  | 131 | 10 | 156 | 10 | 84  |
| Gliotoxin          | pos | 56  | 15 | 61  | 9  | 92  | 37  | 34 | 62  | 14 | 59  | 30  | 33 | 57  | 13 | 53  |
| Griseofulvin       | pos | 60  | 10 | 61  | 11 | 98  | 69  | 6  | 71  | 6  | 96  | 63  | 6  | 65  | 9  | 98  |

|                      |     |     |    |     |    |     |     |    |     |    |     |     |    |     |    |     |
|----------------------|-----|-----|----|-----|----|-----|-----|----|-----|----|-----|-----|----|-----|----|-----|
| Herquiline A         | pos | 56  | 15 | 57  | 16 | 98  | 64  | 9  | 69  | 8  | 94  | 39  | 10 | 43  | 10 | 90  |
| HT-2 Toxin           | neg | 73  | 15 | 75  | 19 | 97  | 74  | 13 | 78  | 17 | 95  | 72  | 18 | 78  | 9  | 93  |
| Lotaustralin         | neg | 117 | 13 | 148 | 47 | 79  | 111 | 7  | 112 | 6  | 100 | 113 | 13 | 114 | 7  | 99  |
| Macrosporin          | neg | 68  | 15 | 72  | 15 | 94  | 46  | 14 | 54  | 17 | 84  | 51  | 16 | 60  | 18 | 86  |
| Malformin C          | neg | 45  | 33 | 61  | 25 | 74  | 61  | 17 | 74  | 17 | 82  | 62  | 12 | 92  | 10 | 67  |
| Mefenamic Acid       | neg | 101 | 12 | 103 | 19 | 99  | 100 | 8  | 102 | 5  | 97  | 104 | 10 | 108 | 10 | 97  |
| Meleagrins           | neg | 44  | 20 | 48  | 15 | 92  | 51  | 11 | 53  | 14 | 95  | 44  | 16 | 49  | 21 | 90  |
| Moniliformin         | neg | 96  | 16 | 153 | 17 | 63  | 89  | 20 | 132 | 11 | 67  | 91  | 19 | 141 | 19 | 65  |
| Monoacetoxyscirpenol | pos | 76  | 14 | 78  | 13 | 98  | 85  | 8  | 88  | 15 | 96  | 82  | 10 | 85  | 6  | 96  |
| Mycophenolic acid    | pos | 84  | 13 | 84  | 14 | 100 | 91  | 8  | 93  | 12 | 98  | 92  | 11 | 97  | 10 | 95  |
| Neosolaniol          | pos | 61  | 19 | 61  | 16 | 100 | 56  | 35 | 60  | 39 | 93  | 39  | 26 | 40  | 23 | 98  |
| Cladosporin          | neg | 42  | 29 | 43  | 25 | 99  | 62  | 9  | 68  | 13 | 91  | 59  | 7  | 71  | 9  | 83  |
| Nivalenol            | neg | 101 | 16 | 105 | 8  | 96  | 98  | 15 | 110 | 5  | 90  | 99  | 16 | 106 | 7  | 93  |
| Norsolorinic Acid    | neg | 61  | 28 | 106 | 23 | 58  | 113 | 20 | 155 | 18 | 73  | 104 | 6  | 155 | 6  | 67  |
| Novaluron            | pos | 105 | 18 | 114 | 19 | 92  | 129 | 9  | 141 | 12 | 92  | 145 | 9  | 153 | 9  | 95  |
| Ochratoxin A         | pos | 89  | 6  | 91  | 9  | 99  | 92  | 4  | 96  | 3  | 97  | 91  | 4  | 93  | 3  | 97  |
| Penitrem A           | pos | 60  | 19 | 63  | 19 | 94  | 65  | 8  | 69  | 9  | 95  | 62  | 7  | 64  | 4  | 96  |
| Permethrin           | pos | 54  | 15 | 57  | 8  | 95  | 42  | 11 | 52  | 17 | 82  | 38  | 18 | 49  | 14 | 78  |
| Phomalone            | neg | 60  | 29 | 61  | 26 | 97  | 79  | 14 | 82  | 15 | 96  | 80  | 17 | 81  | 20 | 100 |
| Pinselin             | neg | 49  | 41 | 49  | 39 | 100 | 58  | 7  | 66  | 13 | 88  | 58  | 7  | 60  | 12 | 98  |
| Prometon             | pos | 96  | 3  | 97  | 5  | 99  | 103 | 3  | 106 | 5  | 98  | 99  | 4  | 101 | 2  | 98  |
| Pseurotin A          | neg | 65  | 32 | 65  | 31 | 100 | 71  | 16 | 78  | 22 | 91  | 108 | 15 | 108 | 14 | 99  |
| Questiomycin A       | pos | 92  | 25 | 103 | 11 | 89  | 111 | 19 | 117 | 11 | 94  | 99  | 19 | 106 | 13 | 93  |
| Quinolactacin A      | pos | 54  | 8  | 60  | 9  | 90  | 69  | 6  | 72  | 4  | 97  | 67  | 3  | 70  | 4  | 96  |
| Rofecoxib            | pos | 30  | 15 | 34  | 19 | 90  | 38  | 14 | 41  | 16 | 93  | 38  | 11 | 41  | 9  | 93  |
| Roquefortine C       | pos | 40  | 14 | 41  | 15 | 96  | 47  | 19 | 50  | 17 | 95  | 44  | 14 | 45  | 9  | 96  |
| Secalonic Acid D     | pos | 65  | 18 | 72  | 19 | 91  | 83  | 16 | 88  | 11 | 94  | 78  | 11 | 79  | 8  | 98  |
| Sterigmatocystin     | pos | 51  | 24 | 54  | 23 | 95  | 66  | 10 | 66  | 10 | 100 | 67  | 10 | 68  | 11 | 99  |
| Sulfamethoxazole     | pos | 61  | 29 | 65  | 23 | 93  | 76  | 24 | 80  | 17 | 96  | 77  | 12 | 77  | 11 | 100 |
| Sulfoxaflor          | neg | 48  | 24 | 52  | 21 | 92  | 59  | 10 | 62  | 10 | 94  | 52  | 13 | 55  | 10 | 94  |
| Sulochrin            | pos | 43  | 13 | 46  | 16 | 93  | 70  | 12 | 70  | 17 | 100 | 54  | 11 | 55  | 13 | 98  |
| T-2 Toxin            | pos | 67  | 13 | 71  | 13 | 95  | 79  | 13 | 83  | 8  | 95  | 79  | 11 | 86  | 8  | 93  |
| Ternatin             | neg | 72  | 18 | 73  | 16 | 98  | 105 | 11 | 118 | 13 | 89  | 114 | 9  | 115 | 9  | 99  |

|                        |            |     |    |     |    |     |     |    |     |    |    |    |    |     |    |     |
|------------------------|------------|-----|----|-----|----|-----|-----|----|-----|----|----|----|----|-----|----|-----|
| Thielavin B            | neg        | 45  | 17 | 49  | 20 | 92  | 56  | 20 | 60  | 19 | 94 | 54 | 14 | 54  | 14 | 100 |
| Tiamulin               | pos        | 85  | 9  | 90  | 7  | 94  | 93  | 11 | 97  | 12 | 95 | 90 | 7  | 90  | 6  | 100 |
| Tilmicosin             | pos        | 119 | 12 | 119 | 10 | 100 | 101 | 13 | 115 | 7  | 88 | 87 | 14 | 102 | 15 | 85  |
| Versicolorin A         | neg        | 51  | 12 | 67  | 15 | 77  | 50  | 18 | 71  | 13 | 70 | 52 | 16 | 69  | 16 | 76  |
| Zearalenon             | neg        | 49  | 27 | 50  | 31 | 99  | 65  | 16 | 67  | 9  | 97 | 55 | 13 | 66  | 14 | 83  |
| <b>average mode</b>    | <b>pos</b> | 62  | 14 | 68  | 14 | 92  | 71  | 13 | 76  | 12 | 93 | 67 | 11 | 73  | 10 | 92  |
| <b>average mode</b>    | <b>neg</b> | 80  | 19 | 91  | 18 | 89  | 91  | 14 | 100 | 13 | 90 | 95 | 12 | 105 | 11 | 90  |
| <b>average overall</b> |            | 71  | 17 | 79  | 16 | 90  | 81  | 13 | 88  | 13 | 91 | 81 | 12 | 89  | 10 | 91  |

| RA %   | RA RSD % | SSE %  | SSE RSD % | RE %  |
|--------|----------|--------|-----------|-------|
| 70-120 | <20      | 80-120 | <20       | >85   |
| <70    | 20-25    | <80    | 20-25     | 70-85 |
| >120   | >25      | >120   | >25       | <70   |

RA    apparent recovery  
SSE    signal suppression enhancement  
RE    extraction efficiency  
RSD    relative standard deviation

Work Sheet 5 - model compound feed

| Supporting Information     | ESI-mode | Cattle |         |       |           |      | Pig  |         |       |           |      | Chicken |         |       |           |      |
|----------------------------|----------|--------|---------|-------|-----------|------|------|---------|-------|-----------|------|---------|---------|-------|-----------|------|
|                            |          | RA %   | RA RSD% | SSE % | SSE RSD % | RE % | RA % | RA RSD% | SSE % | SSE RSD % | RE % | RA %    | RA RSD% | SSE % | SSE RSD % | RE % |
| 15-Acetyldeoxynivalenol    | pos      | 56     | 14      | 68    | 3         | 82   | 86   | 17      | 87    | 12        | 99   | 80      | 15      | 88    | 14        | 91   |
| 15-Hydroxyculmorin         | pos      | 83     | 9       | 93    | 6         | 90   | 105  | 8       | 107   | 4         | 98   | 106     | 11      | 120   | 7         | 89   |
| 3-Acetyldeoxynivalenol     | neg      | 46     | 5       | 50    | 9         | 92   | 58   | 14      | 59    | 17        | 98   | 59      | 17      | 64    | 17        | 92   |
| 3-Methylsterigmatocystin   | pos      | 38     | 3       | 40    | 4         | 94   | 52   | 4       | 55    | 5         | 95   | 54      | 8       | 55    | 6         | 99   |
| 3-Nitropropionic Acid      | neg      | 59     | 3       | 74    | 3         | 80   | 65   | 17      | 78    | 17        | 84   | 58      | 19      | 79    | 18        | 74   |
| Aflatoxin B1               | pos      | 49     | 5       | 49    | 6         | 99   | 41   | 17      | 46    | 2         | 90   | 36      | 9       | 41    | 10        | 89   |
| Aflatoxin B2               | pos      | 37     | 12      | 40    | 12        | 92   | 44   | 11      | 47    | 6         | 93   | 43      | 8       | 46    | 3         | 94   |
| Aflatoxin G1               | pos      | 49     | 7       | 55    | 5         | 89   | 43   | 11      | 48    | 4         | 90   | 40      | 6       | 46    | 5         | 87   |
| Aflatoxin G2               | pos      | 47     | 12      | 49    | 8         | 94   | 55   | 14      | 61    | 12        | 90   | 52      | 8       | 57    | 4         | 92   |
| Aflatoxin M1               | pos      | 59     | 6       | 66    | 3         | 89   | 78   | 6       | 83    | 7         | 93   | 72      | 8       | 82    | 6         | 89   |
| Agistatin E                | neg      | 62     | 5       | 69    | 3         | 89   | 56   | 5       | 72    | 5         | 78   | 62      | 9       | 81    | 6         | 78   |
| alpha-Zearalenol           | neg      | 48     | 8       | 51    | 5         | 94   | 39   | 9       | 43    | 7         | 91   | 44      | 5       | 46    | 11        | 97   |
| Alternariol                | neg      | 41     | 13      | 54    | 16        | 76   | 47   | 5       | 58    | 8         | 81   | 52      | 7       | 54    | 4         | 96   |
| Alternariolmonomethylether | neg      | 59     | 5       | 62    | 15        | 94   | 72   | 7       | 82    | 4         | 89   | 71      | 5       | 77    | 4         | 92   |
| Altersetin                 | neg      | 211    | 11      | 244   | 5         | 86   | 201  | 8       | 248   | 10        | 81   | 214     | 12      | 249   | 10        | 86   |
| Altertoxin-I               | neg      | 41     | 7       | 42    | 8         | 98   | 60   | 9       | 66    | 10        | 91   | 62      | 6       | 67    | 3         | 92   |
| Amidepsin B                | neg      | 107    | 4       | 116   | 10        | 92   | 124  | 10      | 126   | 12        | 99   | 163     | 16      | 182   | 14        | 89   |
| Andrastin A                | neg      | 49     | 4       | 100   | 9         | 49   | 59   | 7       | 109   | 8         | 54   | 61      | 11      | 109   | 6         | 56   |
| Anisomycin                 | pos      | 57     | 5       | 67    | 4         | 85   | 49   | 13      | 59    | 6         | 82   | 30      | 19      | 42    | 17        | 70   |
| Asperphenamate             | neg      | 74     | 8       | 79    | 15        | 95   | 76   | 13      | 81    | 8         | 94   | 77      | 16      | 86    | 3         | 89   |
| Aspon                      | pos      | 73     | 9       | 91    | 5         | 81   | 77   | 3       | 87    | 3         | 89   | 72      | 7       | 91    | 7         | 80   |
| Averantin                  | neg      | 92     | 9       | 100   | 13        | 92   | 74   | 5       | 80    | 9         | 92   | 65      | 18      | 68    | 13        | 95   |
| Averufin                   | neg      | 56     | 3       | 66    | 4         | 85   | 71   | 3       | 84    | 4         | 85   | 55      | 16      | 72    | 8         | 77   |
| Ochratoxin B               | neg      | 60     | 8       | 62    | 6         | 97   | 76   | 5       | 82    | 6         | 93   | 79      | 3       | 82    | 5         | 97   |
| Bentazon                   | neg      | 71     | 7       | 76    | 7         | 93   | 98   | 7       | 102   | 7         | 96   | 101     | 4       | 115   | 6         | 88   |
| Brevianamid F              | pos      | 33     | 18      | 38    | 17        | 86   | 51   | 18      | 55    | 4         | 92   | 49      | 4       | 51    | 5         | 96   |
| Carprofen                  | neg      | 107    | 7       | 124   | 4         | 86   | 112  | 9       | 120   | 6         | 93   | 92      | 9       | 103   | 12        | 90   |
| Cercosporamide             | neg      | 91     | 10      | 97    | 5         | 94   | 124  | 7       | 129   | 3         | 96   | 132     | 3       | 139   | 4         | 95   |
| Chetomin                   | pos      | 27     | 16      | 44    | 8         | 61   | 25   | 11      | 55    | 8         | 45   | 23      | 15      | 52    | 7         | 45   |

|                    |     |     |    |     |    |    |     |    |     |    |     |     |    |     |    |     |
|--------------------|-----|-----|----|-----|----|----|-----|----|-----|----|-----|-----|----|-----|----|-----|
| Chloramphenicol    | neg | 47  | 8  | 53  | 10 | 89 | 48  | 13 | 55  | 15 | 88  | 63  | 11 | 71  | 8  | 88  |
| Cylindrocapon A4   | neg | 96  | 1  | 108 | 2  | 88 | 105 | 1  | 116 | 3  | 90  | 99  | 7  | 108 | 4  | 91  |
| Illicicolin A      | neg | 36  | 14 | 60  | 19 | 60 | 64  | 18 | 89  | 8  | 72  | 65  | 11 | 91  | 5  | 72  |
| Curvularin         | pos | 88  | 4  | 90  | 7  | 97 | 95  | 5  | 102 | 5  | 92  | 92  | 6  | 101 | 5  | 92  |
| Atpenin            | neg | 76  | 5  | 92  | 4  | 83 | 91  | 6  | 105 | 5  | 86  | 92  | 8  | 101 | 4  | 91  |
| Cyclopinin         | pos | 54  | 5  | 58  | 4  | 94 | 55  | 8  | 60  | 4  | 92  | 55  | 9  | 58  | 5  | 95  |
| Cyromazin          | pos | 51  | 9  | 88  | 8  | 57 | 75  | 12 | 92  | 3  | 82  | 60  | 7  | 97  | 10 | 62  |
| Cytochalasin B     | pos | 47  | 16 | 52  | 12 | 90 | 59  | 5  | 68  | 3  | 87  | 59  | 8  | 64  | 10 | 91  |
| Cytochalasin J     | neg | 40  | 15 | 49  | 18 | 81 | 50  | 9  | 55  | 9  | 90  | 63  | 11 | 66  | 7  | 96  |
| Deoxynivalenol     | pos | 99  | 5  | 102 | 5  | 97 | 103 | 9  | 107 | 8  | 96  | 101 | 9  | 109 | 10 | 92  |
| Destruxin A        | pos | 53  | 5  | 59  | 5  | 89 | 60  | 7  | 64  | 5  | 93  | 59  | 7  | 61  | 6  | 96  |
| Diacetoxyscirpenol | neg | 75  | 2  | 76  | 3  | 99 | 75  | 4  | 76  | 5  | 98  | 73  | 4  | 74  | 6  | 99  |
| Dihydrocitrinone   | neg | 165 | 7  | 194 | 7  | 85 | 174 | 5  | 173 | 8  | 100 | 194 | 8  | 228 | 6  | 85  |
| Dinoseb            | pos | 102 | 5  | 116 | 5  | 88 | 109 | 5  | 122 | 3  | 89  | 108 | 6  | 129 | 1  | 84  |
| Dithiopyr          | neg | 72  | 6  | 82  | 10 | 88 | 80  | 11 | 96  | 5  | 83  | 81  | 5  | 96  | 10 | 84  |
| Emodin             | pos | 88  | 4  | 92  | 6  | 95 | 90  | 13 | 94  | 2  | 95  | 85  | 6  | 87  | 4  | 98  |
| Enniatin A1        | neg | 82  | 13 | 94  | 9  | 87 | 79  | 9  | 83  | 6  | 95  | 67  | 17 | 79  | 7  | 84  |
| Equisetin          | pos | 212 | 7  | 237 | 4  | 89 | 252 | 5  | 255 | 3  | 99  | 264 | 9  | 302 | 9  | 87  |
| Ergine             | pos | 45  | 20 | 59  | 15 | 76 | 94  | 15 | 104 | 7  | 90  | 86  | 13 | 88  | 11 | 97  |
| Ergocristine       | pos | 47  | 18 | 57  | 5  | 83 | 66  | 2  | 83  | 7  | 79  | 51  | 4  | 67  | 13 | 76  |
| Ethirimol          | neg | 73  | 4  | 77  | 5  | 94 | 86  | 5  | 91  | 5  | 95  | 81  | 4  | 85  | 5  | 95  |
| Florfenicol        | neg | 45  | 9  | 53  | 5  | 85 | 60  | 10 | 67  | 14 | 90  | 50  | 7  | 50  | 12 | 100 |
| Fluazinam          | neg | 112 | 4  | 133 | 4  | 84 | 108 | 2  | 127 | 2  | 85  | 101 | 6  | 129 | 1  | 78  |
| Flumetasone        | pos | 74  | 6  | 87  | 10 | 85 | 78  | 7  | 92  | 4  | 85  | 78  | 4  | 92  | 5  | 85  |
| Fumigaclavine C    | neg | 31  | 45 | 49  | 16 | 64 | 84  | 9  | 85  | 2  | 98  | 71  | 4  | 76  | 2  | 93  |
| Fumiquinazolin A   | pos | 74  | 12 | 82  | 9  | 89 | 117 | 11 | 118 | 5  | 99  | 124 | 5  | 131 | 5  | 95  |
| Fumonisin B1       | pos | 80  | 5  | 86  | 5  | 94 | 66  | 14 | 67  | 7  | 99  | 59  | 10 | 71  | 11 | 84  |
| Fumonisin B2       | pos | 67  | 6  | 77  | 2  | 87 | 75  | 10 | 81  | 6  | 93  | 68  | 6  | 76  | 7  | 90  |
| Fungerin           | neg | 62  | 15 | 72  | 5  | 87 | 90  | 8  | 91  | 7  | 98  | 86  | 5  | 87  | 5  | 99  |
| Fusarenon X        | neg | 107 | 15 | 119 | 8  | 90 | 94  | 9  | 108 | 5  | 87  | 94  | 5  | 103 | 8  | 91  |
| Gibberellic Acid   | pos | 97  | 5  | 125 | 3  | 78 | 126 | 7  | 151 | 6  | 83  | 124 | 8  | 150 | 5  | 83  |
| Gliotoxin          | pos | 54  | 6  | 62  | 4  | 87 | 34  | 14 | 63  | 5  | 54  | 35  | 19 | 57  | 6  | 61  |
| Griseofulvin       | pos | 56  | 3  | 60  | 5  | 94 | 60  | 5  | 70  | 6  | 86  | 57  | 6  | 63  | 5  | 91  |

|                      |     |     |    |     |    |    |     |    |     |    |     |     |    |     |    |    |
|----------------------|-----|-----|----|-----|----|----|-----|----|-----|----|-----|-----|----|-----|----|----|
| Herquiline A         | pos | 62  | 11 | 63  | 3  | 99 | 73  | 4  | 73  | 4  | 100 | 36  | 9  | 39  | 8  | 93 |
| HT-2 Toxin           | neg | 80  | 3  | 82  | 7  | 98 | 77  | 13 | 84  | 6  | 92  | 74  | 11 | 83  | 5  | 89 |
| Lotaustralin         | neg | 112 | 13 | 141 | 5  | 79 | 97  | 3  | 113 | 4  | 85  | 97  | 4  | 115 | 6  | 85 |
| Macrosporin          | neg | 60  | 6  | 65  | 6  | 93 | 49  | 7  | 53  | 10 | 92  | 51  | 9  | 56  | 13 | 91 |
| Malformin C          | neg | 46  | 10 | 54  | 11 | 85 | 56  | 11 | 77  | 8  | 73  | 67  | 9  | 92  | 3  | 73 |
| Mefenamic Acid       | neg | 88  | 5  | 100 | 6  | 88 | 98  | 8  | 109 | 4  | 90  | 98  | 7  | 113 | 7  | 86 |
| Meleagrins           | neg | 49  | 13 | 56  | 5  | 86 | 45  | 6  | 45  | 7  | 100 | 50  | 8  | 51  | 10 | 98 |
| Moniliformin         | neg | 103 | 3  | 150 | 4  | 68 | 98  | 9  | 132 | 5  | 75  | 101 | 10 | 149 | 15 | 68 |
| Monoacetoxyscirpenol | pos | 80  | 8  | 83  | 10 | 97 | 79  | 7  | 90  | 12 | 87  | 84  | 10 | 86  | 5  | 98 |
| Mycophenolic acid    | pos | 78  | 9  | 84  | 7  | 93 | 84  | 8  | 90  | 6  | 93  | 85  | 11 | 96  | 8  | 89 |
| Neosolaniol          | pos | 64  | 16 | 69  | 12 | 93 | 48  | 17 | 52  | 12 | 93  | 35  | 18 | 38  | 19 | 92 |
| Cladosporin          | neg | 36  | 9  | 37  | 10 | 99 | 58  | 8  | 65  | 7  | 89  | 59  | 6  | 71  | 3  | 83 |
| Nivalenol            | neg | 95  | 6  | 104 | 6  | 90 | 97  | 6  | 111 | 3  | 87  | 98  | 6  | 108 | 5  | 91 |
| Norsolorinic Acid    | neg | 69  | 8  | 107 | 7  | 65 | 112 | 8  | 165 | 6  | 68  | 95  | 19 | 150 | 6  | 63 |
| Novaluron            | pos | 97  | 11 | 101 | 6  | 96 | 133 | 8  | 137 | 12 | 98  | 137 | 11 | 156 | 4  | 87 |
| Ochratoxin A         | pos | 84  | 5  | 87  | 5  | 96 | 92  | 3  | 93  | 3  | 99  | 85  | 4  | 90  | 3  | 95 |
| Penitrem A           | pos | 56  | 16 | 57  | 9  | 99 | 72  | 6  | 72  | 4  | 99  | 69  | 1  | 69  | 2  | 99 |
| Permethrin           | pos | 47  | 10 | 54  | 5  | 88 | 42  | 10 | 56  | 9  | 75  | 35  | 18 | 54  | 10 | 65 |
| Phomalone            | neg | 53  | 9  | 57  | 5  | 92 | 76  | 4  | 85  | 5  | 89  | 81  | 5  | 84  | 5  | 96 |
| Pinselin             | neg | 50  | 14 | 52  | 6  | 97 | 53  | 7  | 60  | 8  | 88  | 62  | 6  | 69  | 6  | 91 |
| Prometon             | pos | 88  | 3  | 97  | 2  | 91 | 93  | 3  | 102 | 2  | 91  | 95  | 3  | 99  | 2  | 96 |
| Pseurotin A          | neg | 59  | 11 | 59  | 5  | 99 | 67  | 11 | 70  | 15 | 96  | 110 | 6  | 113 | 10 | 98 |
| Questiomycin A       | pos | 91  | 11 | 101 | 9  | 90 | 112 | 17 | 122 | 10 | 92  | 95  | 7  | 100 | 10 | 95 |
| Quinolactacin A      | pos | 47  | 3  | 55  | 3  | 87 | 66  | 6  | 73  | 4  | 90  | 60  | 6  | 68  | 7  | 89 |
| Rofecoxib            | pos | 30  | 5  | 33  | 12 | 92 | 33  | 13 | 40  | 9  | 84  | 33  | 5  | 41  | 7  | 79 |
| Roquefortine C       | pos | 36  | 13 | 42  | 5  | 84 | 43  | 13 | 51  | 3  | 85  | 46  | 11 | 48  | 4  | 96 |
| Secalonic Acid D     | pos | 70  | 7  | 79  | 5  | 90 | 75  | 6  | 86  | 3  | 87  | 71  | 3  | 75  | 9  | 94 |
| Sterigmatocystin     | pos | 59  | 5  | 60  | 5  | 98 | 63  | 9  | 64  | 5  | 97  | 69  | 4  | 69  | 4  | 99 |
| Sulfamethoxazole     | pos | 55  | 8  | 66  | 5  | 83 | 71  | 5  | 79  | 8  | 90  | 53  | 11 | 59  | 10 | 90 |
| Sulfoxaflor          | neg | 48  | 8  | 54  | 8  | 89 | 47  | 6  | 49  | 9  | 95  | 45  | 11 | 52  | 9  | 87 |
| Sulochrin            | pos | 42  | 3  | 44  | 2  | 97 | 64  | 6  | 67  | 5  | 96  | 45  | 5  | 48  | 7  | 94 |
| T-2 Toxin            | pos | 70  | 9  | 75  | 6  | 94 | 76  | 8  | 89  | 5  | 86  | 77  | 8  | 83  | 7  | 93 |
| Ternatin             | neg | 70  | 11 | 72  | 7  | 97 | 101 | 4  | 119 | 8  | 85  | 109 | 5  | 113 | 8  | 96 |

|                        |            |     |    |     |    |     |    |    |     |    |    |    |    |     |    |    |
|------------------------|------------|-----|----|-----|----|-----|----|----|-----|----|----|----|----|-----|----|----|
| Thielavin B            | neg        | 55  | 16 | 55  | 5  | 100 | 48 | 7  | 54  | 6  | 90 | 49 | 5  | 52  | 3  | 94 |
| Tiamulin               | pos        | 79  | 6  | 92  | 5  | 86  | 86 | 5  | 95  | 7  | 90 | 86 | 4  | 97  | 5  | 89 |
| Tilmicosin             | pos        | 115 | 5  | 117 | 6  | 98  | 96 | 5  | 112 | 7  | 86 | 76 | 10 | 95  | 14 | 80 |
| Versicolorin A         | neg        | 55  | 11 | 70  | 5  | 79  | 56 | 11 | 72  | 13 | 78 | 59 | 9  | 79  | 10 | 74 |
| Zearalenon             | neg        | 54  | 12 | 59  | 14 | 92  | 59 | 11 | 68  | 22 | 87 | 58 | 13 | 62  | 13 | 94 |
| <b>average mode</b>    | <b>pos</b> | 60  | 10 | 67  | 7  | 89  | 68 | 9  | 76  | 6  | 89 | 63 | 8  | 71  | 7  | 88 |
| <b>average mode</b>    | <b>neg</b> | 79  | 8  | 91  | 7  | 87  | 88 | 8  | 100 | 8  | 88 | 91 | 9  | 105 | 7  | 87 |
| <b>average overall</b> |            | 69  | 9  | 79  | 7  | 88  | 78 | 8  | 88  | 7  | 89 | 77 | 9  | 88  | 7  | 88 |

| RA %   | RA RSD % | SSE %  | SSE RSD % | RE %  |
|--------|----------|--------|-----------|-------|
| 70-120 | <20      | 80-120 | <20       | >85   |
| <70    | 20-25    | <80    | 20-25     | 70-85 |
| >120   | >25      | >120   | >25       | <70   |

RA    apparent recovery  
SSE    signal suppression enhancement  
RE    extraction efficiency  
RSD    relative standard deviation

### Work Sheet 6 - single feed material

| Supporting Information     | ESI-mode | Maize |         |       |           |      | Barley |         |       |           |      |
|----------------------------|----------|-------|---------|-------|-----------|------|--------|---------|-------|-----------|------|
|                            |          | RA %  | RA RSD% | SSE % | SSE RSD % | RE % | RA %   | RA RSD% | SSE % | SSE RSD % | RE % |
| 15-Acetyldeoxynivalenol    | pos      | 50    | 33      | 72    | 12        | 69   | 74     | 24      | 90    | 11        | 83   |
| 15-Hydroxyculmorin         | pos      | 92    | 18      | 105   | 13        | 87   | 84     | 13      | 102   | 9         | 82   |
| 3-Acetyldeoxynivalenol     | neg      | 61    | 43      | 62    | 24        | 99   | 64     | 15      | 65    | 14        | 98   |
| 3-Methylsterigmatocystin   | pos      | 75    | 5       | 80    | 9         | 93   | 80     | 17      | 82    | 17        | 97   |
| 3-Nitropropionic Acid      | neg      | 86    | 13      | 92    | 9         | 94   | 71     | 9       | 95    | 8         | 75   |
| Aflatoxin B1               | pos      | 53    | 35      | 56    | 24        | 93   | 68     | 12      | 68    | 16        | 100  |
| Aflatoxin B2               | pos      | 48    | 11      | 55    | 12        | 88   | 62     | 8       | 71    | 12        | 87   |
| Aflatoxin G1               | pos      | 52    | 19      | 54    | 13        | 97   | 69     | 9       | 72    | 13        | 96   |
| Aflatoxin G2               | pos      | 50    | 10      | 61    | 14        | 83   | 60     | 20      | 66    | 13        | 90   |
| Aflatoxin M1               | pos      | 81    | 12      | 96    | 11        | 84   | 77     | 8       | 96    | 9         | 81   |
| Agistatin E                | neg      | 76    | 13      | 90    | 7         | 84   | 79     | 20      | 80    | 15        | 99   |
| alpha-Zearalenol           | neg      | 62    | 13      | 66    | 9         | 93   | 89     | 26      | 94    | 26        | 94   |
| Alternariol                | neg      | 56    | 20      | 64    | 10        | 88   | 68     | 23      | 70    | 15        | 98   |
| Alternariolmonomethylether | neg      | 86    | 14      | 88    | 10        | 98   | 91     | 18      | 91    | 13        | 99   |
| Altersetin                 | neg      | 180   | 18      | 197   | 30        | 91   | 199    | 4       | 248   | 11        | 80   |
| Altertoxin-I               | neg      | 86    | 9       | 88    | 12        | 97   | 89     | 21      | 94    | 23        | 95   |
| Amidepsin B                | neg      | 118   | 8       | 121   | 9         | 97   | 126    | 5       | 132   | 9         | 95   |
| Andrastin A                | neg      | 61    | 21      | 107   | 4         | 57   | 68     | 10      | 114   | 5         | 60   |
| Anisomycin                 | pos      | 45    | 21      | 55    | 26        | 83   | 63     | 11      | 86    | 9         | 73   |
| Asperphenamate             | neg      | 80    | 29      | 83    | 23        | 96   | 121    | 20      | 122   | 18        | 99   |
| Aspon                      | pos      | 83    | 10      | 108   | 9         | 77   | 76     | 4       | 96    | 7         | 79   |
| Averantin                  | neg      | 73    | 31      | 73    | 25        | 100  | 68     | 9       | 74    | 11        | 91   |
| Averufin                   | neg      | 80    | 20      | 86    | 14        | 92   | 79     | 9       | 99    | 7         | 79   |
| Ochratoxin B               | neg      | 92    | 9       | 101   | 10        | 91   | 83     | 9       | 94    | 11        | 89   |
| Bentazon                   | neg      | 108   | 6       | 114   | 9         | 94   | 106    | 13      | 107   | 14        | 99   |
| Brevianamid F              | pos      | 35    | 34      | 40    | 26        | 87   | 41     | 18      | 43    | 24        | 96   |
| Carprofen                  | neg      | 124   | 8       | 129   | 10        | 96   | 123    | 3       | 129   | 6         | 95   |
| Cercosporamide             | neg      | 137   | 9       | 137   | 6         | 100  | 117    | 5       | 122   | 7         | 96   |
| Chetomin                   | pos      | 34    | 19      | 83    | 15        | 41   | 44     | 15      | 78    | 14        | 56   |
| Chloramphenicol            | neg      | 103   | 11      | 117   | 14        | 88   | 92     | 30      | 106   | 28        | 87   |
| Cylindrocarpon A4          | neg      | 105   | 7       | 111   | 6         | 94   | 108    | 3       | 118   | 2         | 91   |
| Illicicolin A              | neg      | 68    | 36      | 93    | 12        | 73   | 79     | 14      | 110   | 6         | 73   |
| Curvularin                 | pos      | 105   | 11      | 109   | 13        | 96   | 110    | 3       | 111   | 12        | 99   |
| Atpenin                    | neg      | 139   | 9       | 140   | 8         | 99   | 131    | 8       | 141   | 9         | 93   |
| Cyclopinin                 | pos      | 56    | 10      | 67    | 12        | 84   | 68     | 17      | 85    | 15        | 80   |
| Cyromazin                  | pos      | 56    | 16      | 96    | 8         | 58   | 64     | 3       | 104   | 4         | 62   |



|                      |     |     |    |     |    |     |     |    |     |    |     |
|----------------------|-----|-----|----|-----|----|-----|-----|----|-----|----|-----|
| Cytochalasin B       | pos | 60  | 15 | 76  | 18 | 80  | 76  | 13 | 87  | 11 | 88  |
| Cytochalasin J       | neg | 44  | 19 | 56  | 17 | 77  | 63  | 13 | 71  | 5  | 89  |
| Deoxynivalenol       | pos | 83  | 28 | 97  | 14 | 85  | 77  | 10 | 90  | 7  | 86  |
| Destruxin A          | pos | 93  | 14 | 104 | 12 | 90  | 93  | 15 | 106 | 14 | 88  |
| Diacetoxyscirpenol   | neg | 87  | 7  | 90  | 13 | 97  | 96  | 8  | 105 | 10 | 92  |
| Dihydrocitrinone     | neg | 224 | 7  | 233 | 6  | 96  | 143 | 21 | 144 | 21 | 99  |
| Dinoseb              | pos | 107 | 9  | 122 | 8  | 88  | 113 | 9  | 124 | 9  | 91  |
| Dithiopyr            | neg | 97  | 11 | 114 | 12 | 85  | 85  | 8  | 96  | 5  | 88  |
| Emodin               | pos | 98  | 11 | 101 | 9  | 97  | 95  | 26 | 97  | 15 | 98  |
| Enniatin A1          | neg | 78  | 16 | 100 | 18 | 78  | 77  | 12 | 88  | 8  | 87  |
| Equisetin            | pos | 223 | 18 | 225 | 20 | 99  | 294 | 9  | 320 | 6  | 92  |
| Ergine               | pos | 121 | 30 | 123 | 27 | 99  | 129 | 19 | 132 | 17 | 98  |
| Ergocristine         | pos | 64  | 10 | 69  | 19 | 93  | 87  | 25 | 96  | 27 | 90  |
| Ethirimol            | neg | 77  | 8  | 88  | 6  | 88  | 91  | 8  | 103 | 11 | 88  |
| Florfenicol          | neg | 81  | 23 | 92  | 25 | 89  | 90  | 23 | 99  | 23 | 90  |
| Fluazinam            | neg | 112 | 10 | 145 | 8  | 77  | 120 | 4  | 138 | 5  | 86  |
| Flumethasone         | pos | 137 | 5  | 149 | 10 | 92  | 131 | 13 | 150 | 17 | 87  |
| Fumigaclavine C      | neg | 109 | 8  | 121 | 9  | 90  | 111 | 5  | 124 | 9  | 90  |
| Fumiquinazolin A     | pos | 141 | 15 | 155 | 15 | 91  | 97  | 13 | 115 | 15 | 84  |
| Fumonisin B1         | pos | 125 | 19 | 128 | 15 | 98  | 95  | 16 | 95  | 9  | 100 |
| Fumonisin B2         | pos | 83  | 7  | 98  | 19 | 85  | 102 | 13 | 110 | 13 | 93  |
| Fungerin             | neg | 94  | 19 | 113 | 13 | 83  | 125 | 20 | 124 | 20 | 101 |
| Fusarenon X          | neg | 89  | 6  | 94  | 8  | 95  | 84  | 7  | 86  | 4  | 98  |
| Gibberellic Acid     | pos | 152 | 12 | 176 | 13 | 86  | 134 | 8  | 165 | 8  | 81  |
| Gliotoxin            | pos | 47  | 35 | 62  | 9  | 76  | 59  | 22 | 77  | 12 | 77  |
| Griseofulvin         | pos | 70  | 10 | 75  | 10 | 94  | 84  | 12 | 89  | 13 | 95  |
| Herquline A          | pos | 83  | 16 | 94  | 16 | 89  | 68  | 5  | 80  | 5  | 86  |
| HT-2 Toxin           | neg | 70  | 27 | 101 | 32 | 70  | 80  | 26 | 88  | 15 | 92  |
| Lotaustralin         | neg | 112 | 3  | 120 | 7  | 94  | 113 | 22 | 129 | 10 | 88  |
| Macrosporin          | neg | 100 | 16 | 105 | 14 | 96  | 100 | 25 | 108 | 23 | 92  |
| Malformin C          | neg | 84  | 6  | 96  | 13 | 88  | 85  | 24 | 99  | 22 | 86  |
| Mefenamic Acid       | neg | 151 | 13 | 151 | 11 | 99  | 136 | 10 | 148 | 10 | 92  |
| Meleagrín            | neg | 143 | 22 | 134 | 26 | 107 | 109 | 31 | 103 | 25 | 106 |
| Moniliformin         | neg | 101 | 27 | 105 | 45 | 97  | 105 | 5  | 141 | 6  | 75  |
| Monoacetoxyscirpenol | pos | 114 | 6  | 124 | 15 | 92  | 106 | 21 | 127 | 20 | 84  |
| Mycophenolic acid    | pos | 87  | 7  | 96  | 11 | 90  | 88  | 9  | 98  | 7  | 90  |
| Neosolaniol          | pos | 38  | 20 | 42  | 26 | 91  | 102 | 7  | 112 | 8  | 91  |
| Cladosporin          | neg | 81  | 9  | 86  | 13 | 93  | 83  | 13 | 89  | 14 | 93  |
| Nivalenol            | neg | 107 | 16 | 112 | 15 | 95  | 103 | 15 | 102 | 13 | 101 |
| Norsolorinic Acid    | neg | 106 | 16 | 106 | 14 | 100 | 97  | 8  | 111 | 11 | 87  |

|                  |     |     |    |     |    |     |     |    |     |    |     |
|------------------|-----|-----|----|-----|----|-----|-----|----|-----|----|-----|
| Novaluron        | pos | 172 | 16 | 175 | 18 | 99  | 151 | 12 | 163 | 14 | 93  |
| Ochratoxin A     | pos | 109 | 8  | 101 | 5  | 109 | 105 | 7  | 98  | 5  | 107 |
| Penitrems A      | pos | 127 | 7  | 128 | 10 | 99  | 126 | 12 | 123 | 9  | 102 |
| Permethrin       | pos | 57  | 20 | 81  | 16 | 70  | 57  | 14 | 73  | 12 | 78  |
| Phomalone        | neg | 91  | 9  | 94  | 8  | 97  | 93  | 13 | 98  | 13 | 95  |
| Pinselin         | neg | 87  | 8  | 88  | 10 | 99  | 96  | 21 | 98  | 23 | 98  |
| Prometon         | pos | 99  | 8  | 110 | 7  | 90  | 99  | 3  | 108 | 6  | 91  |
| Pseurotin A      | neg | 203 | 18 | 199 | 23 | 102 | 144 | 26 | 149 | 29 | 97  |
| Questiomyacin A  | pos | 85  | 7  | 93  | 7  | 92  | 91  | 7  | 101 | 10 | 90  |
| Quinolactacin A  | pos | 69  | 14 | 78  | 12 | 89  | 75  | 8  | 88  | 6  | 86  |
| Rofecoxib        | pos | 47  | 15 | 52  | 14 | 90  | 50  | 14 | 66  | 17 | 76  |
| Roquefortine C   | pos | 47  | 16 | 48  | 10 | 99  | 62  | 12 | 63  | 11 | 99  |
| Secalonic Acid D | pos | 105 | 8  | 122 | 7  | 86  | 115 | 7  | 132 | 7  | 87  |
| Sterigmatocystin | pos | 78  | 11 | 79  | 8  | 99  | 86  | 17 | 91  | 15 | 95  |
| Sulfamethoxazole | pos | 64  | 29 | 71  | 24 | 91  | 81  | 8  | 89  | 8  | 91  |
| Sulfoxaflo       | neg | 74  | 18 | 84  | 14 | 88  | 80  | 25 | 88  | 26 | 91  |
| Sulochrin        | pos | 55  | 11 | 58  | 13 | 95  | 65  | 6  | 70  | 6  | 93  |
| T-2 Toxin        | pos | 94  | 12 | 96  | 11 | 98  | 92  | 9  | 99  | 12 | 93  |
| Ternatin         | neg | 145 | 19 | 145 | 26 | 100 | 118 | 11 | 129 | 13 | 91  |
| Thielavin B      | neg | 73  | 9  | 74  | 14 | 98  | 76  | 21 | 77  | 20 | 100 |
| Tiamulin         | pos | 90  | 7  | 97  | 3  | 92  | 95  | 3  | 102 | 5  | 93  |
| Tilmicosin       | pos | 113 | 14 | 118 | 9  | 96  | 100 | 8  | 100 | 11 | 100 |
| Versicolorin A   | neg | 94  | 17 | 97  | 16 | 96  | 89  | 22 | 98  | 15 | 91  |
| Zearalenon       | neg | 78  | 13 | 83  | 14 | 94  | 88  | 28 | 92  | 27 | 96  |
| average mode     | pos | 76  | 15 | 87  | 14 | 87  | 83  | 12 | 93  | 11 | 89  |
| average mode     | neg | 109 | 15 | 116 | 14 | 93  | 106 | 15 | 117 | 14 | 91  |
| average overall  |     | 92  | 15 | 101 | 14 | 90  | 95  | 13 | 105 | 13 | 90  |

| RA %   | RA RSD % | SSE %  | SSE RSD % | RE %  |
|--------|----------|--------|-----------|-------|
| 70-120 | <20      | 80-120 | <20       | >85   |
| <70    | 20-25    | <80    | 20-25     | 70-85 |
| >120   | >25      | >120   | >25       | <70   |

RA     apparent recovery  
SSE    signal suppression enhancement  
RE     extraction efficiency  
RSD    relative standard deviation

| Analyte                    | ESI-mode | Rapeseed |         |       |           |      | Wheat Bran |         |       |           |      |
|----------------------------|----------|----------|---------|-------|-----------|------|------------|---------|-------|-----------|------|
|                            |          | RA %     | RA RSD% | SSE % | SSE RSD % | RE % | RA %       | RA RSD% | SSE % | SSE RSD % | RE % |
| 15-Acetyldeoxynivalenol    | pos      | 42       | 25      | 51    | 10        | 82   | 60         | 23      | 85    | 9         | 71   |
| 15-Hydroxyculmorin         | pos      | 86       | 12      | 100   | 10        | 86   | 75         | 15      | 85    | 8         | 88   |
| 3-Acetyldeoxynivalenol     | neg      | 29       | 21      | 30    | 16        | 96   | 58         | 16      | 59    | 10        | 98   |
| 3-Methylsterigmatocystin   | pos      | 67       | 4       | 72    | 2         | 93   | 74         | 4       | 79    | 3         | 94   |
| 3-Nitropropionic Acid      | neg      | 46       | 11      | 48    | 8         | 97   | 72         | 6       | 98    | 10        | 74   |
| Aflatoxin B1               | pos      | 61       | 11      | 61    | 9         | 100  | 64         | 17      | 66    | 10        | 96   |
| Aflatoxin B2               | pos      | 42       | 28      | 47    | 12        | 89   | 58         | 21      | 61    | 13        | 94   |
| Aflatoxin G1               | pos      | 46       | 10      | 49    | 9         | 94   | 52         | 12      | 58    | 7         | 90   |
| Aflatoxin G2               | pos      | 56       | 13      | 63    | 8         | 89   | 66         | 20      | 68    | 7         | 98   |
| Aflatoxin M1               | pos      | 77       | 8       | 78    | 2         | 99   | 81         | 6       | 82    | 5         | 99   |
| Agistatin E                | neg      | 49       | 11      | 51    | 8         | 97   | 77         | 8       | 94    | 5         | 82   |
| alpha-Zearalenol           | neg      | 84       | 6       | 89    | 4         | 95   | 90         | 8       | 93    | 5         | 97   |
| Alternariol                | neg      | 58       | 12      | 59    | 14        | 97   | 46         | 20      | 65    | 8         | 72   |
| Alternariolmonomethylether | neg      | 89       | 6       | 89    | 2         | 99   | 92         | 6       | 95    | 3         | 97   |
| Altersetin                 | neg      | 139      | 43      | 252   | 10        | 55   | 108        | 79      | 220   | 13        | 49   |
| Altertoxin-I               | neg      | 63       | 8       | 65    | 4         | 97   | 83         | 8       | 87    | 4         | 96   |
| Amidepsin B                | neg      | 155      | 12      | 170   | 6         | 91   | 125        | 9       | 136   | 5         | 92   |
| Andrastin A                | neg      | 76       | 5       | 126   | 3         | 60   | 66         | 6       | 121   | 3         | 55   |
| Anisomycin                 | pos      | 11       | 10      | 15    | 5         | 78   | 44         | 10      | 56    | 5         | 78   |
| Asperphenamate             | neg      | 87       | 33      | 91    | 34        | 95   | 106        | 26      | 113   | 16        | 94   |
| Aspon                      | pos      | 79       | 5       | 88    | 3         | 90   | 72         | 9       | 93    | 5         | 78   |
| Averantin                  | neg      | 57       | 8       | 57    | 19        | 100  | 89         | 11      | 89    | 18        | 100  |
| Averufin                   | neg      | 64       | 15      | 80    | 14        | 80   | 99         | 15      | 110   | 9         | 90   |
| Ochratoxin B               | neg      | 92       | 6       | 99    | 8         | 93   | 94         | 8       | 96    | 5         | 99   |
| Bentazon                   | neg      | 68       | 6       | 68    | 4         | 100  | 112        | 5       | 116   | 6         | 97   |
| Brevianamid F              | pos      | 10       | 42      | 21    | 3         | 48   | 40         | 3       | 39    | 5         | 101  |
| Carprofen                  | neg      | 117      | 8       | 125   | 4         | 94   | 125        | 10      | 133   | 4         | 94   |
| Cercosporamide             | neg      | 115      | 8       | 122   | 6         | 95   | 119        | 5       | 120   | 5         | 99   |
| Chetomin                   | pos      | 31       | 18      | 63    | 15        | 48   | 48         | 8       | 69    | 17        | 69   |
| Chloramphenicol            | neg      | 18       | 9       | 19    | 5         | 96   | 104        | 4       | 109   | 4         | 95   |
| Cylindrocarpon A4          | neg      | 112      | 4       | 115   | 4         | 97   | 108        | 4       | 117   | 4         | 92   |
| Illicicolin A              | neg      | 84       | 6       | 101   | 2         | 83   | 65         | 11      | 84    | 4         | 78   |
| Curvularin                 | pos      | 73       | 9       | 74    | 5         | 98   | 96         | 7       | 109   | 9         | 88   |
| Atpenin                    | neg      | 135      | 5       | 137   | 3         | 98   | 128        | 3       | 139   | 4         | 92   |
| Cyclopinin                 | pos      | 58       | 17      | 72    | 4         | 81   | 62         | 9       | 80    | 4         | 77   |
| Cyromazin                  | pos      | 36       | 9       | 61    | 3         | 59   | 60         | 7       | 85    | 6         | 71   |

|                      |     |     |    |     |    |     |     |    |     |    |     |
|----------------------|-----|-----|----|-----|----|-----|-----|----|-----|----|-----|
| Cytochalasin B       | pos | 83  | 13 | 90  | 14 | 93  | 92  | 10 | 100 | 9  | 92  |
| Cytochalasin J       | neg | 68  | 15 | 68  | 12 | 100 | 69  | 19 | 78  | 19 | 89  |
| Deoxynivalenol       | pos | 51  | 19 | 94  | 8  | 54  | 95  | 37 | 100 | 5  | 95  |
| Destruxin A          | pos | 77  | 8  | 87  | 4  | 88  | 73  | 7  | 86  | 6  | 84  |
| Diacetoxyscirpenol   | neg | 85  | 4  | 85  | 4  | 100 | 92  | 4  | 94  | 3  | 97  |
| Dihydrocitrinone     | neg | 147 | 8  | 152 | 3  | 97  | 152 | 6  | 155 | 7  | 98  |
| Dinoseb              | pos | 125 | 3  | 124 | 3  | 101 | 122 | 7  | 129 | 8  | 95  |
| Dithiopyr            | neg | 90  | 9  | 98  | 10 | 92  | 79  | 13 | 102 | 20 | 78  |
| Emodin               | pos | 91  | 36 | 104 | 28 | 88  | 86  | 11 | 99  | 3  | 87  |
| Enniatin A1          | neg | 47  | 15 | 81  | 14 | 59  | 86  | 16 | 96  | 15 | 90  |
| Equisetin            | pos | 209 | 14 | 274 | 3  | 76  | 208 | 15 | 226 | 7  | 92  |
| Ergine               | pos | 19  | 32 | 24  | 7  | 77  | 117 | 7  | 121 | 7  | 97  |
| Ergocristine         | pos | 105 | 20 | 132 | 15 | 79  | 36  | 34 | 61  | 18 | 58  |
| Ethirimol            | neg | 72  | 2  | 74  | 5  | 98  | 86  | 5  | 91  | 6  | 94  |
| Florfenicol          | neg | 41  | 2  | 43  | 4  | 95  | 98  | 3  | 107 | 4  | 92  |
| Fluazinam            | neg | 114 | 10 | 135 | 3  | 84  | 120 | 6  | 140 | 7  | 86  |
| Flumethasone         | pos | 80  | 2  | 84  | 6  | 95  | 133 | 6  | 145 | 7  | 92  |
| Fumigaclavine C      | neg | 46  | 11 | 53  | 6  | 86  | 99  | 7  | 111 | 6  | 90  |
| Fumiquinazolin A     | pos | 95  | 6  | 107 | 4  | 88  | 121 | 7  | 142 | 7  | 85  |
| Fumonisin B1         | pos | 61  | 22 | 88  | 5  | 69  | 95  | 8  | 91  | 8  | 104 |
| Fumonisin B2         | pos | 70  | 20 | 96  | 9  | 73  | 99  | 7  | 101 | 8  | 98  |
| Fungerin             | neg | 112 | 15 | 125 | 15 | 90  | 103 | 11 | 114 | 19 | 90  |
| Fusarenon X          | neg | 86  | 9  | 87  | 5  | 99  | 76  | 17 | 95  | 9  | 80  |
| Gibberellic Acid     | pos | 96  | 4  | 107 | 4  | 90  | 143 | 7  | 159 | 5  | 90  |
| Gliotoxin            | pos | 64  | 7  | 57  | 7  | 112 | 72  | 11 | 69  | 7  | 103 |
| Griseofulvin         | pos | 65  | 9  | 77  | 3  | 84  | 81  | 2  | 87  | 6  | 93  |
| Herquline A          | pos | 20  | 12 | 21  | 3  | 98  | 65  | 11 | 62  | 8  | 106 |
| HT-2 Toxin           | neg | 93  | 18 | 95  | 23 | 98  | 91  | 16 | 112 | 31 | 81  |
| Lotaustralin         | neg | 108 | 3  | 119 | 3  | 91  | 113 | 4  | 116 | 3  | 97  |
| Macrosporin          | neg | 103 | 6  | 104 | 6  | 99  | 109 | 4  | 113 | 4  | 96  |
| Malformin C          | neg | 101 | 4  | 102 | 3  | 99  | 95  | 3  | 103 | 3  | 92  |
| Mefenamic Acid       | neg | 119 | 5  | 136 | 4  | 87  | 141 | 7  | 146 | 3  | 97  |
| Meleagrín            | neg | 62  | 15 | 64  | 7  | 97  | 90  | 15 | 99  | 8  | 91  |
| Moniliformin         | neg | 36  | 14 | 38  | 9  | 93  | 124 | 6  | 146 | 4  | 85  |
| Monoacetoxyscirpenol | pos | 68  | 16 | 71  | 11 | 96  | 112 | 10 | 112 | 11 | 100 |
| Mycophenolic acid    | pos | 89  | 2  | 98  | 4  | 91  | 87  | 3  | 93  | 5  | 93  |
| Neosolaniol          | pos | 49  | 4  | 51  | 3  | 96  | 118 | 5  | 130 | 6  | 91  |
| Cladosporin          | neg | 69  | 7  | 77  | 3  | 89  | 92  | 4  | 92  | 5  | 100 |
| Nivalenol            | neg | 92  | 5  | 98  | 5  | 94  | 113 | 18 | 112 | 7  | 101 |
| Norsolorinic Acid    | neg | 101 | 7  | 117 | 15 | 86  | 148 | 8  | 151 | 8  | 98  |

|                  |     |     |    |     |    |     |     |    |     |    |     |
|------------------|-----|-----|----|-----|----|-----|-----|----|-----|----|-----|
| Novaluron        | pos | 164 | 4  | 166 | 4  | 99  | 166 | 6  | 174 | 8  | 95  |
| Ochratoxin A     | pos | 105 | 8  | 92  | 6  | 115 | 100 | 13 | 90  | 3  | 112 |
| Penitrem A       | pos | 125 | 3  | 120 | 2  | 104 | 120 | 5  | 121 | 2  | 99  |
| Permethrin       | pos | 53  | 18 | 62  | 10 | 85  | 55  | 18 | 66  | 8  | 82  |
| Phomalone        | neg | 86  | 7  | 89  | 3  | 97  | 78  | 11 | 96  | 5  | 81  |
| Pinselín         | neg | 99  | 4  | 94  | 6  | 106 | 104 | 5  | 103 | 8  | 100 |
| Prometon         | pos | 101 | 3  | 103 | 3  | 98  | 99  | 3  | 108 | 2  | 91  |
| Pseurotin A      | neg | 71  | 10 | 74  | 5  | 96  | 137 | 8  | 134 | 5  | 102 |
| Questiomycin A   | pos | 69  | 10 | 74  | 10 | 94  | 90  | 6  | 98  | 1  | 92  |
| Quinolactacin A  | pos | 56  | 4  | 59  | 4  | 95  | 73  | 3  | 77  | 3  | 95  |
| Rofecoxib        | pos | 38  | 10 | 40  | 8  | 97  | 44  | 14 | 48  | 12 | 92  |
| Roquefortine C   | pos | 49  | 13 | 50  | 13 | 98  | 49  | 12 | 51  | 7  | 95  |
| Secalonic Acid D | pos | 104 | 3  | 120 | 3  | 87  | 107 | 6  | 128 | 8  | 83  |
| Sterigmatocystin | pos | 82  | 5  | 82  | 5  | 100 | 76  | 6  | 83  | 5  | 91  |
| Sulfamethoxazole | pos | 27  | 7  | 27  | 5  | 100 | 90  | 5  | 92  | 5  | 98  |
| Sulfoxaflo       | neg | 13  | 10 | 13  | 4  | 98  | 89  | 4  | 90  | 7  | 99  |
| Sulochrin        | pos | 48  | 6  | 48  | 6  | 99  | 53  | 9  | 54  | 6  | 97  |
| T-2 Toxin        | pos | 98  | 5  | 99  | 2  | 99  | 99  | 6  | 103 | 5  | 96  |
| Ternatin         | neg | 125 | 8  | 126 | 5  | 99  | 122 | 7  | 123 | 4  | 99  |
| Thielavin B      | neg | 70  | 11 | 72  | 5  | 98  | 79  | 15 | 83  | 9  | 95  |
| Tiamulin         | pos | 80  | 12 | 84  | 5  | 95  | 93  | 4  | 93  | 4  | 99  |
| Tilmicosin       | pos | 88  | 28 | 92  | 14 | 96  | 82  | 17 | 88  | 15 | 93  |
| Versicolorin A   | neg | 96  | 6  | 100 | 4  | 96  | 91  | 6  | 98  | 10 | 92  |
| Zearalenon       | neg | 86  | 4  | 85  | 3  | 102 | 94  | 7  | 96  | 5  | 98  |
| average mode     | pos | 66  | 12 | 73  | 8  | 89  | 79  | 10 | 86  | 8  | 91  |
| average mode     | neg | 89  | 10 | 99  | 7  | 92  | 106 | 11 | 118 | 6  | 91  |
| average overall  |     | 78  | 11 | 86  | 7  | 91  | 92  | 10 | 102 | 7  | 91  |

| RA %   | RA RSD % | SSE %  | SSE RSD % | RE %  |
|--------|----------|--------|-----------|-------|
| 70-120 | <20      | 80-120 | <20       | >85   |
| <70    | 20-25    | <80    | 20-25     | 70-85 |
| >120   | >25      | >120   | >25       | <70   |

RA     apparent recovery  
SSE    signal suppression enhancement  
RE     extraction efficiency  
RSD    relative standard deviation

| Analyte                    | ESI-mode | Alfalfa |         |       |           |      | Silage |         |       |           |      |
|----------------------------|----------|---------|---------|-------|-----------|------|--------|---------|-------|-----------|------|
|                            |          | RA %    | RA RSD% | SSE % | SSE RSD % | RE % | RA %   | RA RSD% | SSE % | SSE RSD % | RE % |
| 15-Acetyldeoxynivalenol    | pos      | 39      | 20      | 57    | 18        | 69   | 55     | 46      | 70    | 24        | 79   |
| 15-Hydroxyculmorin         | pos      | 56      | 17      | 66    | 6         | 84   | 71     | 21      | 88    | 16        | 80   |
| 3-Acetyldeoxynivalenol     | neg      | 44      | 10      | 50    | 12        | 88   | 38     | 37      | 43    | 41        | 88   |
| 3-Methylsterigmatocystin   | pos      | 33      | 17      | 33    | 20        | 100  | 40     | 29      | 46    | 27        | 88   |
| 3-Nitropropionic Acid      | neg      | 41      | 22      | 59    | 13        | 70   | 41     | 54      | 55    | 49        | 74   |
| Aflatoxin B1               | pos      | 42      | 21      | 53    | 30        | 80   | 46     | 35      | 50    | 17        | 91   |
| Aflatoxin B2               | pos      | 33      | 10      | 37    | 18        | 91   | 39     | 32      | 53    | 23        | 74   |
| Aflatoxin G1               | pos      | 49      | 21      | 52    | 13        | 93   | 86     | 46      | 90    | 20        | 96   |
| Aflatoxin G2               | pos      | 71      | 11      | 77    | 31        | 93   | 54     | 48      | 61    | 16        | 88   |
| Aflatoxin M1               | pos      | 56      | 13      | 56    | 17        | 99   | 45     | 35      | 61    | 24        | 73   |
| Agistatin E                | neg      | 52      | 10      | 54    | 7         | 96   | 59     | 19      | 88    | 6         | 67   |
| alpha-Zearalenol           | neg      | 41      | 22      | 41    | 30        | 100  | 40     | 32      | 42    | 36        | 95   |
| Alternariol                | neg      | 20      | 3       | 26    | 13        | 76   | 33     | 24      | 36    | 15        | 92   |
| Alternariolmonomethylether | neg      | 41      | 49      | 42    | 37        | 97   | 42     | 26      | 52    | 21        | 81   |
| Altersetin                 | neg      | 129     | 10      | 241   | 73        | 54   | 125    | 23      | 215   | 18        | 58   |
| Altertoxin-I               | neg      | 38      | 25      | 40    | 20        | 95   | 42     | 38      | 45    | 35        | 93   |
| Amidepsin B                | neg      | 133     | 26      | 136   | 15        | 97   | 123    | 10      | 123   | 11        | 100  |
| Andrastin A                | neg      | 56      | 17      | 93    | 17        | 60   | 59     | 14      | 105   | 13        | 56   |
| Anisomycin                 | pos      | 61      | 8       | 77    | 6         | 79   | 76     | 16      | 90    | 11        | 85   |
| Asperphenamate             | neg      | 40      | 43      | 40    | 38        | 100  | 37     | 44      | 49    | 28        | 74   |
| Aspon                      | pos      | 81      | 4       | 83    | 4         | 97   | 76     | 4       | 87    | 5         | 87   |
| Averantin                  | neg      | 127     | 20      | 163   | 13        | 78   | 127    | 22      | 146   | 16        | 87   |
| Averufin                   | neg      | 52      | 14      | 52    | 13        | 100  | 87     | 17      | 103   | 12        | 84   |
| Ochratoxin B               | neg      | 59      | 22      | 58    | 20        | 102  | 47     | 43      | 56    | 31        | 84   |
| Bentazon                   | neg      | 53      | 11      | 57    | 22        | 94   | 74     | 29      | 79    | 28        | 94   |
| Brevianamid F              | pos      | 25      | 19      | 27    | 17        | 91   | 39     | 33      | 46    | 31        | 86   |
| Carprofen                  | neg      | 102     | 8       | 104   | 3         | 99   | 102    | 14      | 122   | 19        | 83   |
| Cercosporamide             | neg      | 78      | 23      | 137   | 45        | 57   | 116    | 16      | 121   | 13        | 96   |
| Chetomin                   | pos      | 18      | 2       | 32    | 16        | 56   | 36     | 12      | 37    | 10        | 99   |
| Chloramphenicol            | neg      | 41      | 13      | 42    | 15        | 98   | 64     | 26      | 81    | 22        | 79   |
| Cylindrocarpon A4          | neg      | 87      | 19      | 84    | 16        | 104  | 105    | 3       | 116   | 3         | 91   |
| Illicicolin A              | neg      | 41      | 27      | 38    | 38        | 107  | 68     | 5       | 89    | 7         | 76   |
| Curvularin                 | pos      | 71      | 7       | 78    | 7         | 90   | 65     | 17      | 62    | 21        | 104  |
| Atpenin                    | neg      | 97      | 15      | 87    | 18        | 112  | 86     | 10      | 102   | 11        | 84   |
| Cyclopinin                 | pos      | 44      | 14      | 52    | 16        | 85   | 51     | 13      | 68    | 14        | 75   |
| Cyromazin                  | pos      | 52      | 13      | 89    | 14        | 58   | 30     | 17      | 50    | 20        | 60   |

|                      |     |     |    |     |    |     |     |    |     |    |     |
|----------------------|-----|-----|----|-----|----|-----|-----|----|-----|----|-----|
| Cytochalasin B       | pos | 57  | 8  | 80  | 7  | 71  | 32  | 20 | 49  | 19 | 65  |
| Cytochalasin J       | neg | 37  | 14 | 40  | 16 | 91  | 52  | 18 | 59  | 13 | 88  |
| Deoxynivalenol       | pos | 90  | 5  | 95  | 6  | 95  | 85  | 16 | 91  | 10 | 94  |
| Destruxin A          | pos | 44  | 28 | 50  | 23 | 88  | 38  | 45 | 46  | 35 | 83  |
| Diacetoxyscirpenol   | neg | 63  | 10 | 63  | 14 | 100 | 68  | 12 | 82  | 14 | 83  |
| Dihydrocitrinone     | neg | 197 | 7  | 201 | 2  | 98  | 174 | 14 | 207 | 18 | 84  |
| Dinoseb              | pos | 98  | 10 | 97  | 11 | 100 | 99  | 14 | 109 | 10 | 91  |
| Dithiopyr            | neg | 70  | 5  | 78  | 7  | 89  | 67  | 12 | 89  | 7  | 76  |
| Emodin               | pos | 70  | 16 | 81  | 10 | 86  | 77  | 18 | 91  | 12 | 84  |
| Enniatin A1          | neg | 87  | 11 | 98  | 8  | 89  | 28  | 29 | 52  | 17 | 54  |
| Equisetin            | pos | 156 | 18 | 156 | 16 | 100 | 161 | 9  | 181 | 11 | 89  |
| Ergine               | pos | 85  | 22 | 90  | 10 | 95  | 45  | 37 | 59  | 33 | 77  |
| Ergocristine         | pos | 53  | 26 | 85  | 18 | 62  | 46  | 31 | 73  | 23 | 63  |
| Ethirimol            | neg | 65  | 6  | 68  | 9  | 95  | 77  | 17 | 79  | 17 | 97  |
| Florfenicol          | neg | 43  | 18 | 44  | 19 | 97  | 45  | 54 | 56  | 46 | 80  |
| Fluazinam            | neg | 119 | 4  | 127 | 5  | 93  | 121 | 5  | 130 | 3  | 93  |
| Flumethasone         | pos | 69  | 4  | 79  | 22 | 88  | 78  | 17 | 83  | 19 | 94  |
| Fumigaclavine C      | neg | 64  | 16 | 73  | 15 | 87  | 70  | 14 | 94  | 19 | 75  |
| Fumiquinazolin A     | pos | 49  | 15 | 59  | 17 | 83  | 44  | 44 | 58  | 44 | 76  |
| Fumonisin B1         | pos | 50  | 63 | 80  | 8  | 62  | 79  | 15 | 74  | 11 | 106 |
| Fumonisin B2         | pos | 57  | 61 | 72  | 9  | 78  | 70  | 14 | 71  | 5  | 99  |
| Fungerin             | neg | 90  | 14 | 97  | 9  | 94  | 84  | 9  | 98  | 17 | 86  |
| Fusarenon X          | neg | 94  | 8  | 96  | 10 | 98  | 73  | 20 | 89  | 18 | 81  |
| Gibberellic Acid     | pos | 104 | 9  | 119 | 5  | 88  | 117 | 16 | 144 | 12 | 82  |
| Gliotoxin            | pos | 63  | 17 | 57  | 9  | 110 | 72  | 11 | 61  | 6  | 117 |
| Griseofulvin         | pos | 46  | 19 | 49  | 30 | 92  | 48  | 15 | 57  | 20 | 84  |
| Herquline A          | pos | 70  | 12 | 67  | 15 | 104 | 63  | 17 | 68  | 14 | 93  |
| HT-2 Toxin           | neg | 79  | 29 | 98  | 16 | 80  | 75  | 18 | 80  | 18 | 95  |
| Lotaustralin         | neg | 79  | 42 | 141 | 28 | 56  | 110 | 13 | 128 | 7  | 86  |
| Macrosporin          | neg | 47  | 24 | 48  | 13 | 97  | 66  | 15 | 75  | 12 | 89  |
| Malformin C          | neg | 32  | 43 | 33  | 42 | 98  | 49  | 37 | 55  | 37 | 90  |
| Mefenamic Acid       | neg | 70  | 7  | 72  | 7  | 97  | 102 | 15 | 112 | 12 | 92  |
| Meleagrín            | neg | 85  | 26 | 88  | 23 | 96  | 92  | 30 | 95  | 15 | 97  |
| Moniliformin         | neg | 88  | 22 | 130 | 8  | 68  | 126 | 18 | 150 | 13 | 84  |
| Monoacetoxyscirpenol | pos | 67  | 29 | 71  | 14 | 95  | 95  | 25 | 101 | 18 | 94  |
| Mycophenolic acid    | pos | 68  | 13 | 76  | 19 | 89  | 71  | 17 | 82  | 9  | 86  |
| Neosolaniol          | pos | 62  | 18 | 68  | 19 | 91  | 58  | 38 | 76  | 33 | 77  |
| Cladosporin          | neg | 25  | 31 | 29  | 49 | 85  | 40  | 78 | 44  | 59 | 89  |
| Nivalenol            | neg | 93  | 6  | 108 | 4  | 87  | 97  | 18 | 102 | 13 | 95  |
| Norsolorinic Acid    | neg | 38  | 39 | 54  | 21 | 69  | 87  | 10 | 139 | 12 | 63  |

|                  |     |    |    |    |    |     |     |    |     |    |     |
|------------------|-----|----|----|----|----|-----|-----|----|-----|----|-----|
| Novaluron        | pos | 82 | 8  | 88 | 19 | 94  | 139 | 11 | 143 | 9  | 98  |
| Ochratoxin A     | pos | 84 | 5  | 75 | 7  | 112 | 78  | 17 | 77  | 11 | 100 |
| Penitrem A       | pos | 50 | 5  | 50 | 13 | 100 | 69  | 19 | 75  | 16 | 91  |
| Permethrin       | pos | 42 | 5  | 47 | 8  | 90  | 48  | 19 | 56  | 19 | 86  |
| Phomalone        | neg | 42 | 18 | 43 | 31 | 96  | 57  | 19 | 68  | 17 | 84  |
| Pinselín         | neg | 43 | 14 | 48 | 26 | 88  | 40  | 27 | 43  | 33 | 94  |
| Prometon         | pos | 80 | 8  | 84 | 7  | 96  | 81  | 10 | 89  | 7  | 91  |
| Pseurotin A      | neg | 49 | 11 | 48 | 8  | 101 | 97  | 18 | 94  | 23 | 104 |
| Questiomycin A   | pos | 63 | 10 | 69 | 12 | 91  | 73  | 26 | 78  | 25 | 94  |
| Quinolactacin A  | pos | 46 | 15 | 47 | 15 | 98  | 47  | 31 | 59  | 27 | 79  |
| Rofecoxib        | pos | 32 | 15 | 32 | 7  | 99  | 31  | 25 | 37  | 19 | 84  |
| Roquefortine C   | pos | 35 | 14 | 38 | 16 | 92  | 35  | 38 | 41  | 30 | 85  |
| Secalonic Acid D | pos | 41 | 19 | 57 | 20 | 71  | 56  | 14 | 68  | 23 | 81  |
| Sterigmatocystin | pos | 39 | 52 | 45 | 21 | 86  | 32  | 34 | 39  | 23 | 83  |
| Sulfamethoxazole | pos | 41 | 22 | 43 | 24 | 95  | 40  | 49 | 53  | 32 | 76  |
| Sulfoxaflo       | neg | 47 | 16 | 48 | 18 | 98  | 53  | 40 | 62  | 29 | 86  |
| Sulochrin        | pos | 31 | 10 | 31 | 9  | 99  | 30  | 9  | 36  | 10 | 83  |
| T-2 Toxin        | pos | 64 | 18 | 64 | 27 | 100 | 54  | 28 | 60  | 26 | 89  |
| Ternatin         | neg | 44 | 21 | 46 | 26 | 96  | 74  | 20 | 83  | 27 | 89  |
| Thielavin B      | neg | 39 | 6  | 42 | 7  | 92  | 60  | 15 | 68  | 16 | 89  |
| Tiamulin         | pos | 71 | 9  | 73 | 6  | 98  | 74  | 14 | 78  | 9  | 95  |
| Tilmicosin       | pos | 40 | 27 | 53 | 15 | 75  | 32  | 28 | 43  | 9  | 74  |
| Versicolorin A   | neg | 47 | 20 | 49 | 17 | 95  | 73  | 10 | 89  | 13 | 81  |
| Zearalenon       | neg | 41 | 32 | 42 | 21 | 99  | 36  | 46 | 38  | 45 | 95  |
| average mode     | pos | 55 | 19 | 63 | 15 | 88  | 57  | 26 | 65  | 36 | 154 |
| average mode     | neg | 69 | 18 | 80 | 19 | 90  | 80  | 23 | 94  | 20 | 86  |
| average overall  |     | 62 | 18 | 71 | 17 | 89  | 68  | 24 | 80  | 19 | 85  |

| RA %   | RA RSD % | SSE %  | SSE RSD % | RE %  |
|--------|----------|--------|-----------|-------|
| 70-120 | <20      | 80-120 | <20       | >85   |
| <70    | 20-25    | <80    | 20-25     | 70-85 |
| >120   | >25      | >120   | >25       | <70   |

RA     apparent recovery  
SSE    signal suppression enhancement  
RE     extraction efficiency  
RSD    relative standard deviation



| Analyte                    | ESI-mode | DDGS |         |       |           |      | Triticale |         |       |           |      |
|----------------------------|----------|------|---------|-------|-----------|------|-----------|---------|-------|-----------|------|
|                            |          | RA % | RA RSD% | SSE % | SSE RSD % | RE % | RA %      | RA RSD% | SSE % | SSE RSD % | RE % |
| 15-Acetyldeoxynivalenol    | pos      | 34   | 28      | 65    | 45        | 52   | 71        | 13      | 84    | 4         | 85   |
| 15-Hydroxyculmorin         | pos      | 80   | 17      | 95    | 18        | 85   | 67        | 19      | 78    | 22        | 86   |
| 3-Acetyldeoxynivalenol     | neg      | 34   | 23      | 38    | 24        | 89   | 60        | 6       | 67    | 8         | 89   |
| 3-Methylsterigmatocystin   | pos      | 42   | 6       | 45    | 8         | 93   | 80        | 4       | 81    | 2         | 98   |
| 3-Nitropropionic Acid      | neg      | 29   | 56      | 43    | 65        | 68   | 57        | 10      | 96    | 4         | 60   |
| Aflatoxin B1               | pos      | 28   | 28      | 29    | 21        | 98   | 81        | 13      | 81    | 4         | 100  |
| Aflatoxin B2               | pos      | 31   | 17      | 36    | 22        | 85   | 66        | 5       | 73    | 5         | 91   |
| Aflatoxin G1               | pos      | 32   | 26      | 32    | 30        | 100  | 70        | 3       | 81    | 5         | 86   |
| Aflatoxin G2               | pos      | 39   | 44      | 50    | 17        | 78   | 70        | 10      | 80    | 7         | 87   |
| Aflatoxin M1               | pos      | 47   | 27      | 49    | 23        | 96   | 80        | 3       | 89    | 5         | 90   |
| Agistatin E                | neg      | 55   | 10      | 63    | 4         | 87   | 81        | 7       | 94    | 6         | 86   |
| alpha-Zearalenol           | neg      | 47   | 19      | 48    | 23        | 97   | 95        | 9       | 97    | 8         | 98   |
| Alternariol                | neg      | 43   | 14      | 46    | 8         | 95   | 76        | 22      | 81    | 19        | 93   |
| Alternariolmonomethylether | neg      | 67   | 14      | 71    | 15        | 94   | 102       | 15      | 106   | 11        | 97   |
| Altersetin                 | neg      | 204  | 17      | 247   | 7         | 83   | 241       | 19      | 294   | 12        | 82   |
| Altertoxin-I               | neg      | 48   | 11      | 49    | 11        | 97   | 91        | 7       | 106   | 8         | 86   |
| Amidepsin B                | neg      | 119  | 7       | 123   | 3         | 96   | 128       | 4       | 130   | 6         | 99   |
| Andrastin A                | neg      | 61   | 6       | 110   | 3         | 56   | 69        | 4       | 120   | 2         | 57   |
| Anisomycin                 | pos      | 26   | 4       | 36    | 8         | 72   | 61        | 3       | 97    | 6         | 63   |
| Asperphenamate             | neg      | 61   | 16      | 62    | 32        | 98   | 119       | 17      | 125   | 3         | 96   |
| Aspon                      | pos      | 72   | 6       | 86    | 2         | 84   | 73        | 6       | 88    | 5         | 82   |
| Averantin                  | neg      | 79   | 31      | 85    | 50        | 92   | 90        | 4       | 90    | 5         | 100  |
| Averufin                   | neg      | 75   | 22      | 100   | 15        | 75   | 99        | 10      | 125   | 6         | 79   |
| Ochratoxin B               | neg      | 68   | 10      | 76    | 7         | 90   | 84        | 2       | 92    | 5         | 91   |
| Bentazon                   | neg      | 92   | 3       | 95    | 6         | 96   | 112       | 5       | 121   | 9         | 93   |
| Brevianamid F              | pos      | 7    | 81      | 23    | 38        | 32   | 47        | 12      | 53    | 6         | 88   |
| Carprofen                  | neg      | 138  | 14      | 138   | 14        | 100  | 118       | 4       | 134   | 8         | 88   |
| Cercosporamide             | neg      | 132  | 9       | 133   | 6         | 100  | 113       | 3       | 126   | 2         | 90   |
| Chetomin                   | pos      | 38   | 14      | 41    | 6         | 92   | 33        | 13      | 55    | 18        | 60   |
| Chloramphenicol            | neg      | 62   | 5       | 72    | 8         | 87   | 106       | 3       | 128   | 3         | 83   |
| Cylindrocarpon A4          | neg      | 116  | 6       | 119   | 5         | 98   | 100       | 3       | 115   | 2         | 87   |
| Illicicolin A              | neg      | 58   | 12      | 91    | 6         | 64   | 70        | 3       | 90    | 2         | 78   |
| Curvularin                 | pos      | 85   | 8       | 91    | 9         | 94   | 105       | 5       | 119   | 1         | 88   |
| Atpenin                    | neg      | 98   | 13      | 106   | 15        | 93   | 112       | 8       | 140   | 3         | 80   |
| Cyclopinin                 | pos      | 40   | 19      | 47    | 25        | 85   | 73        | 5       | 88    | 4         | 83   |
| Cyromazin                  | pos      | 28   | 16      | 76    | 7         | 37   | 54        | 3       | 84    | 4         | 64   |

|                      |     |     |    |     |    |     |     |    |     |    |     |
|----------------------|-----|-----|----|-----|----|-----|-----|----|-----|----|-----|
| Cytochalasin B       | pos | 35  | 19 | 41  | 20 | 86  | 63  | 11 | 71  | 7  | 89  |
| Cytochalasin J       | neg | 22  | 19 | 27  | 14 | 82  | 65  | 14 | 78  | 15 | 83  |
| Deoxynivalenol       | pos | 79  | 15 | 82  | 6  | 96  | 88  | 26 | 103 | 9  | 85  |
| Destruxin A          | pos | 50  | 13 | 58  | 6  | 87  | 72  | 3  | 81  | 2  | 88  |
| Diacetoxyscirpenol   | neg | 59  | 23 | 59  | 23 | 100 | 91  | 3  | 101 | 1  | 91  |
| Dihydrocitrinone     | neg | 251 | 20 | 281 | 21 | 89  | 133 | 6  | 141 | 3  | 94  |
| Dinoseb              | pos | 100 | 10 | 116 | 2  | 86  | 126 | 8  | 132 | 4  | 95  |
| Dithiopyr            | neg | 76  | 13 | 94  | 10 | 81  | 85  | 10 | 93  | 12 | 91  |
| Emodin               | pos | 102 | 9  | 115 | 8  | 89  | 111 | 10 | 118 | 3  | 94  |
| Enniatin A1          | neg | 58  | 16 | 69  | 23 | 84  | 76  | 20 | 83  | 19 | 91  |
| Equisetin            | pos | 204 | 14 | 268 | 12 | 76  | 252 | 6  | 282 | 5  | 89  |
| Ergine               | pos | 56  | 22 | 76  | 19 | 74  | 109 | 4  | 117 | 4  | 93  |
| Ergocristine         | pos | 26  | 21 | 31  | 26 | 84  | 86  | 12 | 99  | 18 | 87  |
| Ethirimol            | neg | 55  | 36 | 59  | 32 | 94  | 101 | 4  | 102 | 3  | 99  |
| Florfenicol          | neg | 49  | 20 | 53  | 15 | 93  | 103 | 3  | 117 | 7  | 88  |
| Fluazinam            | neg | 126 | 6  | 135 | 5  | 93  | 118 | 4  | 138 | 5  | 85  |
| Flumethasone         | pos | 83  | 3  | 94  | 3  | 88  | 120 | 3  | 153 | 7  | 78  |
| Fumigaclavine C      | neg | 77  | 21 | 89  | 18 | 87  | 92  | 1  | 109 | 2  | 85  |
| Fumiquinazolin A     | pos | 97  | 10 | 109 | 6  | 89  | 149 | 4  | 166 | 2  | 90  |
| Fumonisin B1         | pos | 40  | 29 | 42  | 32 | 95  | 65  | 11 | 76  | 11 | 85  |
| Fumonisin B2         | pos | 71  | 20 | 77  | 13 | 91  | 67  | 6  | 71  | 11 | 94  |
| Fungerin             | neg | 79  | 20 | 100 | 20 | 78  | 102 | 6  | 106 | 10 | 97  |
| Fusarenon X          | neg | 74  | 13 | 81  | 11 | 91  | 85  | 15 | 91  | 12 | 94  |
| Gibberellic Acid     | pos | 111 | 12 | 123 | 16 | 90  | 130 | 5  | 158 | 1  | 82  |
| Gliotoxin            | pos | 52  | 9  | 46  | 10 | 113 | 67  | 11 | 75  | 7  | 90  |
| Griseofulvin         | pos | 41  | 7  | 46  | 8  | 90  | 76  | 5  | 82  | 9  | 93  |
| Herquline A          | pos | 64  | 8  | 80  | 16 | 80  | 73  | 5  | 79  | 4  | 92  |
| HT-2 Toxin           | neg | 59  | 19 | 67  | 33 | 87  | 82  | 31 | 85  | 38 | 97  |
| Lotaustralin         | neg | 92  | 5  | 116 | 3  | 79  | 105 | 4  | 119 | 1  | 88  |
| Macrosporin          | neg | 74  | 29 | 81  | 29 | 92  | 114 | 7  | 122 | 7  | 93  |
| Malformin C          | neg | 70  | 20 | 69  | 20 | 102 | 87  | 8  | 116 | 3  | 75  |
| Mefenamic Acid       | neg | 136 | 17 | 138 | 18 | 98  | 128 | 4  | 144 | 7  | 89  |
| Meleagrins           | neg | 65  | 26 | 60  | 10 | 108 | 136 | 3  | 134 | 7  | 102 |
| Moniliformin         | neg | 120 | 9  | 146 | 26 | 82  | 102 | 19 | 147 | 2  | 70  |
| Monoacetoxyscirpenol | pos | 65  | 25 | 73  | 17 | 89  | 97  | 4  | 117 | 6  | 83  |
| Mycophenolic acid    | pos | 83  | 8  | 86  | 6  | 96  | 79  | 6  | 88  | 11 | 90  |
| Neosolaniol          | pos | 19  | 10 | 23  | 14 | 80  | 100 | 4  | 118 | 3  | 85  |
| Cladosporin          | neg | 60  | 10 | 65  | 10 | 93  | 93  | 8  | 109 | 5  | 86  |
| Nivalenol            | neg | 95  | 6  | 107 | 4  | 88  | 110 | 1  | 115 | 1  | 96  |
| Norsolorinic Acid    | neg | 114 | 9  | 149 | 8  | 76  | 121 | 5  | 156 | 3  | 78  |

|                  |     |     |    |     |    |     |     |    |     |    |     |
|------------------|-----|-----|----|-----|----|-----|-----|----|-----|----|-----|
| Novaluron        | pos | 156 | 13 | 162 | 12 | 96  | 166 | 7  | 180 | 3  | 92  |
| Ochratoxin A     | pos | 90  | 7  | 84  | 5  | 108 | 92  | 5  | 94  | 5  | 98  |
| Penitrem A       | pos | 65  | 18 | 75  | 10 | 87  | 118 | 9  | 113 | 8  | 104 |
| Permethrin       | pos | 31  | 18 | 49  | 20 | 64  | 49  | 8  | 61  | 11 | 79  |
| Phomalone        | neg | 77  | 9  | 79  | 7  | 97  | 96  | 6  | 112 | 6  | 85  |
| Pinselín         | neg | 61  | 10 | 63  | 12 | 98  | 102 | 3  | 113 | 8  | 90  |
| Prometon         | pos | 71  | 18 | 79  | 14 | 90  | 92  | 5  | 101 | 3  | 91  |
| Pseurotin A      | neg | 99  | 15 | 101 | 13 | 98  | 155 | 8  | 181 | 14 | 86  |
| Questiomycin A   | pos | 72  | 9  | 79  | 9  | 92  | 92  | 3  | 101 | 1  | 92  |
| Quinolactacin A  | pos | 38  | 29 | 50  | 31 | 75  | 78  | 4  | 87  | 2  | 90  |
| Rofecoxib        | pos | 28  | 18 | 29  | 12 | 96  | 51  | 20 | 60  | 15 | 86  |
| Roquefortine C   | pos | 24  | 19 | 31  | 15 | 78  | 66  | 18 | 67  | 10 | 98  |
| Secalonic Acid D | pos | 56  | 7  | 66  | 6  | 85  | 99  | 3  | 115 | 4  | 85  |
| Sterigmatocystin | pos | 53  | 5  | 54  | 7  | 97  | 80  | 7  | 80  | 3  | 100 |
| Sulfamethoxazole | pos | 41  | 52 | 44  | 37 | 93  | 79  | 7  | 86  | 11 | 92  |
| Sulfoxaflo       | neg | 42  | 8  | 46  | 10 | 90  | 99  | 5  | 107 | 3  | 92  |
| Sulochrin        | pos | 34  | 35 | 34  | 35 | 100 | 65  | 10 | 68  | 6  | 95  |
| T-2 Toxin        | pos | 62  | 18 | 69  | 18 | 90  | 82  | 6  | 97  | 1  | 85  |
| Ternatin         | neg | 109 | 10 | 114 | 9  | 96  | 117 | 10 | 143 | 8  | 82  |
| Thielavin B      | neg | 47  | 12 | 48  | 9  | 98  | 90  | 11 | 95  | 12 | 95  |
| Tiamulin         | pos | 62  | 19 | 66  | 17 | 95  | 98  | 2  | 99  | 5  | 98  |
| Tilmicosin       | pos | 76  | 22 | 82  | 30 | 93  | 85  | 11 | 102 | 7  | 83  |
| Versicolorin A   | neg | 76  | 30 | 80  | 26 | 95  | 92  | 9  | 107 | 7  | 86  |
| Zearalenon       | neg | 48  | 11 | 60  | 24 | 80  | 96  | 8  | 108 | 3  | 89  |
| average mode     | pos | 51  | 21 | 58  | 18 | 87  | 78  | 8  | 87  | 8  | 89  |
| average mode     | neg | 90  | 14 | 101 | 14 | 90  | 111 | 8  | 128 | 6  | 87  |
| average overall  |     | 70  | 17 | 80  | 16 | 88  | 95  | 8  | 108 | 7  | 88  |

| RA %   | RA RSD % | SSE %  | SSE RSD % | RE %  |
|--------|----------|--------|-----------|-------|
| 70-120 | <20      | 80-120 | <20       | >85   |
| <70    | 20-25    | <80    | 20-25     | 70-85 |
| >120   | >25      | >120   | >25       | <70   |

RA     apparent recovery  
SSE    signal suppression enhancement  
RE     extraction efficiency  
RSD    relative standard deviation

| Analyte                    | ESI-mode | Wheat |         |       |           |      | Sunflower |         |       |           |      |
|----------------------------|----------|-------|---------|-------|-----------|------|-----------|---------|-------|-----------|------|
|                            |          | RA %  | RA RSD% | SSE % | SSE RSD % | RE % | RA %      | RA RSD% | SSE % | SSE RSD % | RE % |
| 15-Acetyldeoxynivalenol    | pos      | 66    | 24      | 79    | 12        | 83   | 54        | 24      | 63    | 13        | 86   |
| 15-Hydroxyculmorin         | pos      | 72    | 19      | 85    | 19        | 86   | 83        | 9       | 93    | 7         | 88   |
| 3-Acetyldeoxynivalenol     | neg      | 56    | 19      | 66    | 17        | 84   | 35        | 12      | 39    | 18        | 91   |
| 3-Methylsterigmatocystin   | pos      | 74    | 9       | 79    | 6         | 94   | 64        | 5       | 69    | 8         | 92   |
| 3-Nitropropionic Acid      | neg      | 74    | 15      | 116   | 10        | 64   | 64        | 8       | 96    | 7         | 67   |
| Aflatoxin B1               | pos      | 63    | 16      | 64    | 19        | 98   | 54        | 15      | 59    | 6         | 91   |
| Aflatoxin B2               | pos      | 56    | 24      | 65    | 27        | 86   | 42        | 24      | 51    | 7         | 84   |
| Aflatoxin G1               | pos      | 64    | 21      | 64    | 17        | 100  | 46        | 20      | 53    | 4         | 87   |
| Aflatoxin G2               | pos      | 61    | 21      | 73    | 16        | 84   | 51        | 27      | 63    | 24        | 81   |
| Aflatoxin M1               | pos      | 74    | 9       | 90    | 13        | 82   | 63        | 11      | 71    | 12        | 89   |
| Agistatin E                | neg      | 69    | 14      | 90    | 12        | 77   | 49        | 19      | 63    | 12        | 78   |
| alpha-Zearalenol           | neg      | 94    | 12      | 98    | 11        | 96   | 66        | 9       | 73    | 7         | 91   |
| Alternariol                | neg      | 65    | 34      | 83    | 24        | 78   | 51        | 27      | 55    | 1         | 93   |
| Alternariolmonomethylether | neg      | 101   | 12      | 112   | 7         | 91   | 60        | 28      | 90    | 14        | 67   |
| Altersetin                 | neg      | 139   | 23      | 180   | 26        | 77   | 177       | 19      | 257   | 7         | 69   |
| Altertoxin-I               | neg      | 92    | 15      | 102   | 17        | 90   | 60        | 14      | 63    | 15        | 96   |
| Amidepsin B                | neg      | 122   | 14      | 130   | 6         | 94   | 133       | 15      | 143   | 12        | 93   |
| Andrastin A                | neg      | 66    | 9       | 119   | 7         | 56   | 67        | 6       | 116   | 7         | 57   |
| Anisomycin                 | pos      | 55    | 20      | 90    | 14        | 62   | 41        | 12      | 66    | 13        | 62   |
| Asperphenamate             | neg      | 84    | 24      | 114   | 24        | 74   | 74        | 38      | 90    | 4         | 83   |
| Aspon                      | pos      | 72    | 2       | 89    | 5         | 80   | 68        | 15      | 81    | 8         | 84   |
| Averantin                  | neg      | 91    | 6       | 94    | 5         | 97   | 74        | 19      | 76    | 18        | 98   |
| Averufin                   | neg      | 97    | 8       | 121   | 7         | 80   | 61        | 24      | 97    | 10        | 63   |
| Ochratoxin B               | neg      | 80    | 7       | 88    | 3         | 91   | 81        | 27      | 90    | 9         | 90   |
| Bentazon                   | neg      | 107   | 5       | 123   | 8         | 87   | 57        | 20      | 62    | 16        | 92   |
| Brevianamid F              | pos      | 45    | 26      | 48    | 24        | 94   | 29        | 26      | 32    | 20        | 93   |
| Carprofen                  | neg      | 119   | 8       | 136   | 4         | 88   | 122       | 2       | 148   | 14        | 83   |
| Cercosporamide             | neg      | 111   | 5       | 126   | 5         | 88   | 102       | 7       | 121   | 6         | 84   |
| Chetomin                   | pos      | 34    | 16      | 58    | 17        | 60   | 25        | 6       | 49    | 10        | 51   |
| Chloramphenicol            | neg      | 99    | 10      | 120   | 11        | 83   | 36        | 53      | 36    | 36        | 101  |
| Cylindrocarpon A4          | neg      | 99    | 4       | 115   | 3         | 86   | 100       | 9       | 113   | 3         | 89   |
| Illicicolin A              | neg      | 69    | 14      | 92    | 7         | 75   | 44        | 31      | 97    | 14        | 45   |
| Curvularin                 | pos      | 105   | 16      | 115   | 24        | 92   | 76        | 10      | 86    | 12        | 89   |
| Atpenin                    | neg      | 114   | 5       | 139   | 5         | 82   | 87        | 15      | 100   | 12        | 87   |
| Cyclopenin                 | pos      | 63    | 6       | 83    | 12        | 76   | 55        | 11      | 63    | 5         | 88   |
| Cyromazin                  | pos      | 54    | 12      | 88    | 5         | 62   | 52        | 18      | 87    | 9         | 59   |

|                      |     |     |    |     |    |    |     |    |     |    |     |
|----------------------|-----|-----|----|-----|----|----|-----|----|-----|----|-----|
| Cytochalasin B       | pos | 56  | 18 | 63  | 13 | 88 | 53  | 11 | 60  | 9  | 88  |
| Cytochalasin J       | neg | 51  | 14 | 59  | 13 | 87 | 37  | 11 | 42  | 13 | 88  |
| Deoxynivalenol       | pos | 87  | 13 | 100 | 12 | 87 | 64  | 35 | 73  | 17 | 87  |
| Destruxin A          | pos | 72  | 7  | 80  | 6  | 90 | 63  | 4  | 73  | 9  | 86  |
| Diacetoxyscirpenol   | neg | 85  | 8  | 99  | 7  | 86 | 83  | 9  | 85  | 7  | 98  |
| Dihydrocitrinone     | neg | 140 | 14 | 144 | 6  | 97 | 119 | 20 | 147 | 13 | 81  |
| Dinoseb              | pos | 128 | 6  | 132 | 6  | 97 | 112 | 4  | 123 | 6  | 92  |
| Dithiopyr            | neg | 85  | 7  | 104 | 12 | 82 | 81  | 11 | 96  | 14 | 84  |
| Emodin               | pos | 95  | 16 | 128 | 20 | 74 | 89  | 10 | 112 | 5  | 80  |
| Enniatin A1          | neg | 67  | 17 | 80  | 18 | 84 | 46  | 11 | 77  | 11 | 59  |
| Equisetin            | pos | 224 | 18 | 264 | 12 | 85 | 235 | 11 | 272 | 8  | 87  |
| Ergine               | pos | 115 | 21 | 127 | 8  | 91 | 20  | 19 | 28  | 18 | 71  |
| Ergocristine         | pos | 91  | 10 | 127 | 24 | 72 | 101 | 14 | 132 | 11 | 76  |
| Ethirimol            | neg | 99  | 11 | 103 | 7  | 96 | 100 | 16 | 101 | 9  | 99  |
| Florfenicol          | neg | 99  | 22 | 108 | 23 | 92 | 22  | 17 | 27  | 17 | 80  |
| Fluazinam            | neg | 117 | 7  | 139 | 4  | 84 | 125 | 8  | 136 | 4  | 92  |
| Flumethasone         | pos | 120 | 13 | 146 | 18 | 82 | 82  | 7  | 98  | 17 | 84  |
| Fumigaclavine C      | neg | 96  | 4  | 108 | 4  | 88 | 95  | 6  | 110 | 9  | 86  |
| Fumiquinazolin A     | pos | 146 | 16 | 161 | 22 | 91 | 65  | 16 | 79  | 12 | 82  |
| Fumonisin B1         | pos | 61  | 19 | 69  | 13 | 88 | 41  | 18 | 79  | 10 | 52  |
| Fumonisin B2         | pos | 62  | 14 | 64  | 15 | 98 | 45  | 17 | 65  | 9  | 69  |
| Fungerin             | neg | 97  | 17 | 105 | 16 | 92 | 143 | 13 | 151 | 12 | 95  |
| Fusarenon X          | neg | 87  | 19 | 101 | 35 | 87 | 48  | 26 | 62  | 22 | 78  |
| Gibberellic Acid     | pos | 138 | 23 | 168 | 17 | 82 | 89  | 11 | 118 | 5  | 76  |
| Gliotoxin            | pos | 53  | 21 | 68  | 16 | 79 | 47  | 12 | 53  | 5  | 87  |
| Griseofulvin         | pos | 76  | 6  | 82  | 8  | 92 | 55  | 11 | 60  | 13 | 92  |
| Herquline A          | pos | 64  | 20 | 74  | 8  | 87 | 49  | 10 | 60  | 11 | 81  |
| HT-2 Toxin           | neg | 71  | 24 | 84  | 18 | 85 | 53  | 25 | 72  | 20 | 74  |
| Lotaustralin         | neg | 105 | 9  | 116 | 5  | 90 | 99  | 3  | 114 | 5  | 87  |
| Macrosporin          | neg | 114 | 5  | 123 | 5  | 93 | 74  | 15 | 93  | 11 | 79  |
| Malformin C          | neg | 89  | 11 | 118 | 9  | 75 | 61  | 10 | 77  | 8  | 79  |
| Mefenamic Acid       | neg | 118 | 6  | 133 | 5  | 89 | 120 | 3  | 158 | 10 | 76  |
| Meleagrins           | neg | 123 | 18 | 129 | 22 | 96 | 47  | 13 | 45  | 15 | 105 |
| Moniliformin         | neg | 87  | 13 | 152 | 17 | 57 | 97  | 16 | 130 | 9  | 75  |
| Monoacetoxyscirpenol | pos | 96  | 19 | 112 | 14 | 86 | 66  | 13 | 76  | 14 | 86  |
| Mycophenolic acid    | pos | 79  | 6  | 92  | 5  | 87 | 80  | 10 | 87  | 7  | 92  |
| Neosolaniol          | pos | 103 | 11 | 124 | 9  | 83 | 78  | 15 | 84  | 11 | 92  |
| Cladosporin          | neg | 91  | 14 | 104 | 10 | 87 | 71  | 8  | 81  | 12 | 88  |
| Nivalenol            | neg | 103 | 12 | 112 | 4  | 92 | 89  | 8  | 97  | 10 | 92  |
| Norsolorinic Acid    | neg | 116 | 4  | 147 | 9  | 79 | 71  | 19 | 100 | 36 | 71  |

|                  |     |     |    |     |    |     |     |    |     |    |     |
|------------------|-----|-----|----|-----|----|-----|-----|----|-----|----|-----|
| Novaluron        | pos | 168 | 6  | 187 | 7  | 90  | 160 | 6  | 168 | 3  | 95  |
| Ochratoxin A     | pos | 89  | 4  | 89  | 5  | 100 | 93  | 24 | 96  | 6  | 96  |
| Penitrem A       | pos | 115 | 7  | 116 | 6  | 100 | 91  | 8  | 90  | 5  | 101 |
| Permethrin       | pos | 51  | 8  | 71  | 7  | 73  | 31  | 18 | 57  | 9  | 55  |
| Phomalone        | neg | 90  | 15 | 111 | 7  | 81  | 76  | 4  | 80  | 9  | 94  |
| Pinselín         | neg | 104 | 8  | 113 | 8  | 92  | 72  | 5  | 79  | 10 | 91  |
| Prometon         | pos | 93  | 4  | 104 | 6  | 90  | 82  | 6  | 91  | 7  | 90  |
| Pseurotin A      | neg | 152 | 7  | 170 | 13 | 90  | 60  | 7  | 62  | 12 | 96  |
| Questiomycin A   | pos | 90  | 7  | 96  | 6  | 94  | 90  | 13 | 94  | 10 | 96  |
| Quinolactacin A  | pos | 71  | 24 | 82  | 21 | 87  | 54  | 19 | 62  | 8  | 87  |
| Rofecoxib        | pos | 48  | 19 | 55  | 20 | 88  | 33  | 17 | 36  | 6  | 92  |
| Roquefortine C   | pos | 68  | 19 | 72  | 13 | 94  | 60  | 19 | 80  | 16 | 75  |
| Secalonic Acid D | pos | 99  | 6  | 116 | 8  | 86  | 77  | 7  | 91  | 6  | 85  |
| Sterigmatocystin | pos | 74  | 15 | 81  | 9  | 91  | 62  | 6  | 71  | 7  | 87  |
| Sulfamethoxazole | pos | 93  | 16 | 103 | 24 | 90  | 75  | 32 | 87  | 35 | 86  |
| Sulfoxaflo       | neg | 90  | 24 | 98  | 25 | 92  | 26  | 12 | 29  | 4  | 90  |
| Sulochrin        | pos | 67  | 15 | 70  | 13 | 96  | 48  | 12 | 50  | 9  | 97  |
| T-2 Toxin        | pos | 79  | 6  | 96  | 6  | 82  | 68  | 11 | 84  | 6  | 81  |
| Ternatin         | neg | 119 | 7  | 145 | 10 | 82  | 90  | 5  | 113 | 10 | 80  |
| Thielavin B      | neg | 90  | 14 | 95  | 6  | 95  | 64  | 11 | 66  | 11 | 97  |
| Tiamulin         | pos | 102 | 7  | 102 | 5  | 99  | 87  | 6  | 99  | 9  | 88  |
| Tilmicosin       | pos | 126 | 19 | 130 | 13 | 97  | 93  | 13 | 119 | 7  | 78  |
| Versicolorin A   | neg | 97  | 7  | 112 | 8  | 87  | 73  | 10 | 88  | 15 | 83  |
| Zearalenon       | neg | 95  | 8  | 104 | 12 | 91  | 67  | 4  | 72  | 10 | 93  |
| average mode     | pos | 76  | 14 | 87  | 12 | 87  | 64  | 14 | 76  | 10 | 84  |
| average mode     | neg | 106 | 13 | 125 | 12 | 85  | 81  | 14 | 98  | 11 | 84  |
| average overall  |     | 91  | 13 | 106 | 12 | 86  | 72  | 14 | 87  | 11 | 84  |

| RA %   | RA RSD % | SSE %  | SSE RSD % | RE %  |
|--------|----------|--------|-----------|-------|
| 70-120 | <20      | 80-120 | <20       | >85   |
| <70    | 20-25    | <80    | 20-25     | 70-85 |
| >120   | >25      | >120   | >25       | <70   |

RA     apparent recovery  
SSE    signal suppression enhancement  
RE     extraction efficiency  
RSD    relative standard deviation

| Analyte                    | ESI-mode | Soy  |         |       |           |      | Horsebean |         |       |           |      |
|----------------------------|----------|------|---------|-------|-----------|------|-----------|---------|-------|-----------|------|
|                            |          | RA % | RA RSD% | SSE % | SSE RSD % | RE % | RA %      | RA RSD% | SSE % | SSE RSD % | RE % |
| 15-Acetyldeoxynivalenol    | pos      | 51   | 22      | 60    | 21        | 85   | 53        | 19      | 63    | 13        | 83   |
| 15-Hydroxyculmorin         | pos      | 94   | 10      | 102   | 8         | 92   | 82        | 4       | 91    | 8         | 90   |
| 3-Acetyldeoxynivalenol     | neg      | 42   | 15      | 43    | 24        | 98   | 48        | 14      | 52    | 3         | 92   |
| 3-Methylsterigmatocystin   | pos      | 56   | 7       | 58    | 9         | 97   | 67        | 4       | 73    | 2         | 91   |
| 3-Nitropropionic Acid      | neg      | 61   | 20      | 99    | 6         | 61   | 65        | 8       | 89    | 6         | 73   |
| Aflatoxin B1               | pos      | 49   | 32      | 49    | 27        | 100  | 71        | 8       | 73    | 8         | 98   |
| Aflatoxin B2               | pos      | 49   | 15      | 50    | 9         | 98   | 63        | 9       | 69    | 5         | 91   |
| Aflatoxin G1               | pos      | 45   | 21      | 47    | 22        | 96   | 49        | 12      | 50    | 7         | 99   |
| Aflatoxin G2               | pos      | 56   | 21      | 65    | 3         | 87   | 68        | 19      | 68    | 7         | 100  |
| Aflatoxin M1               | pos      | 77   | 15      | 82    | 17        | 94   | 83        | 7       | 83    | 2         | 99   |
| Agistatin E                | neg      | 38   | 23      | 66    | 15        | 58   | 45        | 12      | 96    | 6         | 46   |
| alpha-Zearalenol           | neg      | 34   | 8       | 37    | 9         | 92   | 95        | 5       | 98    | 3         | 96   |
| Alternariol                | neg      | 46   | 25      | 59    | 22        | 78   | 87        | 4       | 91    | 3         | 95   |
| Alternariolmonomethylether | neg      | 61   | 11      | 72    | 12        | 84   | 110       | 2       | 110   | 1         | 100  |
| Altersetin                 | neg      | 206  | 18      | 281   | 6         | 73   | 189       | 5       | 266   | 10        | 71   |
| Altertoxin-I               | neg      | 66   | 17      | 71    | 18        | 92   | 99        | 7       | 105   | 5         | 94   |
| Amidepsin B                | neg      | 216  | 15      | 235   | 12        | 92   | 119       | 9       | 130   | 3         | 92   |
| Andrastin A                | neg      | 56   | 33      | 111   | 8         | 51   | 74        | 6       | 128   | 6         | 58   |
| Anisomycin                 | pos      | 53   | 8       | 88    | 7         | 60   | 81        | 3       | 118   | 3         | 69   |
| Asperphenamate             | neg      | 70   | 24      | 80    | 19        | 88   | 106       | 28      | 120   | 27        | 88   |
| Aspon                      | pos      | 71   | 9       | 87    | 4         | 82   | 76        | 5       | 88    | 4         | 87   |
| Averantin                  | neg      | 60   | 25      | 61    | 16        | 98   | 68        | 10      | 58    | 5         | 117  |
| Averufin                   | neg      | 55   | 22      | 82    | 8         | 67   | 69        | 10      | 81    | 7         | 85   |
| Ochratoxin B               | neg      | 78   | 10      | 90    | 7         | 86   | 88        | 5       | 91    | 3         | 97   |
| Bentazon                   | neg      | 96   | 4       | 102   | 6         | 94   | 107       | 4       | 111   | 5         | 96   |
| Brevianamid F              | pos      | 30   | 10      | 33    | 25        | 91   | 33        | 10      | 33    | 10        | 100  |
| Carprofen                  | neg      | 103  | 9       | 120   | 10        | 85   | 119       | 8       | 131   | 6         | 91   |
| Cercosporamide             | neg      | 119  | 6       | 131   | 5         | 91   | 105       | 4       | 116   | 5         | 90   |
| Chetomin                   | pos      | 19   | 49      | 48    | 18        | 39   | 19        | 30      | 61    | 9         | 31   |
| Chloramphenicol            | neg      | 39   | 34      | 50    | 31        | 79   | 93        | 4       | 103   | 3         | 90   |
| Cylindrocapon A4           | neg      | 100  | 11      | 113   | 5         | 88   | 109       | 1       | 111   | 1         | 98   |
| Illicicolin A              | neg      | 57   | 50      | 108   | 23        | 53   | 79        | 18      | 108   | 2         | 73   |
| Curvularin                 | pos      | 100  | 5       | 108   | 8         | 93   | 101       | 3       | 107   | 3         | 94   |
| Atpenin                    | neg      | 81   | 19      | 105   | 13        | 77   | 110       | 4       | 129   | 3         | 85   |
| Cyclopinin                 | pos      | 57   | 11      | 66    | 10        | 87   | 82        | 3       | 85    | 1         | 96   |
| Cyromazin                  | pos      | 61   | 14      | 105   | 9         | 58   | 63        | 5       | 103   | 4         | 60   |

|                      |     |     |    |     |    |     |     |    |     |    |    |
|----------------------|-----|-----|----|-----|----|-----|-----|----|-----|----|----|
| Cytochalasin B       | pos | 59  | 17 | 71  | 15 | 83  | 85  | 15 | 98  | 8  | 86 |
| Cytochalasin J       | neg | 75  | 13 | 89  | 4  | 85  | 82  | 3  | 93  | 5  | 88 |
| Deoxynivalenol       | pos | 73  | 8  | 83  | 6  | 87  | 67  | 8  | 74  | 2  | 91 |
| Destruxin A          | pos | 65  | 7  | 69  | 5  | 94  | 70  | 5  | 79  | 4  | 89 |
| Diacetoxyscirpenol   | neg | 84  | 5  | 85  | 5  | 98  | 96  | 0  | 100 | 2  | 96 |
| Dihydrocitrinone     | neg | 162 | 11 | 164 | 13 | 98  | 126 | 5  | 133 | 8  | 95 |
| Dinoseb              | pos | 111 | 8  | 122 | 6  | 91  | 129 | 3  | 135 | 1  | 96 |
| Dithiopyr            | neg | 89  | 12 | 103 | 13 | 86  | 100 | 13 | 110 | 8  | 90 |
| Emodin               | pos | 76  | 17 | 99  | 9  | 77  | 111 | 5  | 112 | 2  | 99 |
| Enniatin A1          | neg | 43  | 17 | 76  | 18 | 57  | 64  | 17 | 75  | 19 | 86 |
| Equisetin            | pos | 247 | 21 | 299 | 12 | 83  | 228 | 4  | 276 | 11 | 82 |
| Ergine               | pos | 83  | 19 | 106 | 12 | 78  | 113 | 3  | 133 | 3  | 85 |
| Ergocristine         | pos | 111 | 11 | 146 | 19 | 77  | 114 | 19 | 135 | 9  | 85 |
| Ethirimol            | neg | 88  | 19 | 91  | 16 | 97  | 77  | 10 | 83  | 14 | 93 |
| Florfenicol          | neg | 70  | 4  | 80  | 7  | 88  | 40  | 26 | 43  | 20 | 93 |
| Fluazinam            | neg | 107 | 8  | 135 | 6  | 79  | 74  | 17 | 141 | 4  | 52 |
| Flumethasone         | pos | 92  | 8  | 101 | 9  | 91  | 112 | 9  | 129 | 4  | 87 |
| Fumigaclavine C      | neg | 88  | 8  | 102 | 3  | 86  | 91  | 5  | 103 | 6  | 88 |
| Fumiquinazolin A     | pos | 122 | 13 | 136 | 12 | 90  | 159 | 9  | 169 | 4  | 94 |
| Fumonisin B1         | pos | 18  | 37 | 66  | 11 | 27  | 61  | 16 | 80  | 8  | 76 |
| Fumonisin B2         | pos | 58  | 18 | 148 | 19 | 39  | 58  | 10 | 68  | 7  | 84 |
| Fungerin             | neg | 130 | 15 | 125 | 15 | 104 | 125 | 11 | 129 | 14 | 96 |
| Fusarenon X          | neg | 88  | 4  | 97  | 5  | 91  | 88  | 4  | 95  | 7  | 93 |
| Gibberellic Acid     | pos | 111 | 10 | 147 | 3  | 75  | 120 | 3  | 143 | 4  | 84 |
| Gliotoxin            | pos | 32  | 49 | 56  | 25 | 57  | 41  | 34 | 75  | 9  | 55 |
| Griseofulvin         | pos | 51  | 21 | 61  | 27 | 83  | 89  | 4  | 95  | 3  | 94 |
| Herquline A          | pos | 56  | 9  | 75  | 10 | 75  | 63  | 6  | 79  | 5  | 81 |
| HT-2 Toxin           | neg | 85  | 48 | 93  | 30 | 92  | 95  | 22 | 98  | 31 | 97 |
| Lotaustralin         | neg | 94  | 3  | 118 | 2  | 80  | 97  | 1  | 111 | 3  | 87 |
| Macrosporin          | neg | 36  | 11 | 55  | 25 | 65  | 120 | 8  | 123 | 6  | 98 |
| Malformin C          | neg | 37  | 21 | 49  | 11 | 76  | 65  | 9  | 121 | 4  | 54 |
| Mefenamic Acid       | neg | 81  | 11 | 110 | 15 | 74  | 106 | 7  | 125 | 4  | 85 |
| Meleagrins           | neg | 32  | 19 | 30  | 18 | 106 | 71  | 11 | 74  | 14 | 96 |
| Moniliformin         | neg | 99  | 8  | 133 | 4  | 74  | 147 | 5  | 175 | 5  | 84 |
| Monoacetoxyscirpenol | pos | 74  | 26 | 82  | 6  | 91  | 91  | 13 | 106 | 14 | 86 |
| Mycophenolic acid    | pos | 94  | 6  | 102 | 5  | 91  | 83  | 17 | 88  | 18 | 94 |
| Neosolaniol          | pos | 108 | 11 | 116 | 14 | 93  | 94  | 8  | 99  | 9  | 95 |
| Cladosporin          | neg | 59  | 5  | 69  | 10 | 85  | 95  | 6  | 99  | 3  | 95 |
| Nivalenol            | neg | 91  | 9  | 104 | 2  | 87  | 94  | 5  | 102 | 2  | 93 |
| Norsolorinic Acid    | neg | 78  | 27 | 125 | 15 | 62  | 133 | 8  | 154 | 16 | 86 |



|                  |     |     |    |     |    |     |     |    |     |    |     |
|------------------|-----|-----|----|-----|----|-----|-----|----|-----|----|-----|
| Novaluron        | pos | 122 | 7  | 145 | 10 | 84  | 179 | 6  | 191 | 5  | 94  |
| Ochratoxin A     | pos | 93  | 10 | 102 | 11 | 91  | 92  | 5  | 91  | 6  | 100 |
| Penitrem A       | pos | 86  | 9  | 85  | 9  | 101 | 97  | 9  | 103 | 16 | 94  |
| Permethrin       | pos | 36  | 14 | 64  | 11 | 56  | 46  | 9  | 62  | 11 | 74  |
| Phomalone        | neg | 78  | 6  | 85  | 9  | 93  | 104 | 4  | 107 | 4  | 97  |
| Pinselín         | neg | 52  | 7  | 58  | 10 | 91  | 102 | 5  | 111 | 2  | 92  |
| Prometon         | pos | 97  | 2  | 103 | 5  | 95  | 95  | 2  | 104 | 3  | 92  |
| Pseurotin A      | neg | 57  | 19 | 56  | 22 | 102 | 159 | 5  | 154 | 7  | 103 |
| Questiomycin A   | pos | 81  | 15 | 83  | 13 | 97  | 94  | 4  | 98  | 2  | 96  |
| Quinolactacin A  | pos | 69  | 11 | 81  | 5  | 85  | 70  | 7  | 74  | 6  | 94  |
| Rofecoxib        | pos | 43  | 16 | 52  | 20 | 83  | 64  | 4  | 65  | 9  | 98  |
| Roquefortine C   | pos | 53  | 11 | 54  | 11 | 98  | 103 | 5  | 108 | 8  | 96  |
| Secalonic Acid D | pos | 75  | 7  | 88  | 11 | 84  | 101 | 9  | 113 | 8  | 90  |
| Sterigmatocystin | pos | 58  | 15 | 58  | 7  | 100 | 86  | 4  | 93  | 3  | 93  |
| Sulfamethoxazole | pos | 79  | 22 | 83  | 19 | 95  | 102 | 6  | 105 | 9  | 98  |
| Sulfoxaflo       | neg | 40  | 18 | 41  | 18 | 97  | 81  | 9  | 88  | 8  | 92  |
| Sulochrin        | pos | 76  | 28 | 81  | 30 | 94  | 73  | 3  | 75  | 3  | 97  |
| T-2 Toxin        | pos | 87  | 6  | 95  | 9  | 92  | 98  | 5  | 100 | 4  | 99  |
| Ternatin         | neg | 98  | 12 | 121 | 8  | 81  | 128 | 5  | 151 | 5  | 85  |
| Thielavin B      | neg | 44  | 9  | 52  | 6  | 84  | 64  | 21 | 67  | 9  | 96  |
| Tiamulin         | pos | 96  | 11 | 98  | 13 | 98  | 92  | 9  | 96  | 5  | 96  |
| Tilmicosin       | pos | 147 | 12 | 150 | 9  | 98  | 124 | 7  | 129 | 11 | 97  |
| Versicolorin A   | neg | 37  | 20 | 71  | 28 | 52  | 98  | 4  | 102 | 4  | 96  |
| Zearalenon       | neg | 39  | 4  | 42  | 9  | 93  | 99  | 3  | 100 | 2  | 99  |
| average mode     | pos | 70  | 17 | 83  | 13 | 84  | 80  | 9  | 90  | 8  | 89  |
| average mode     | neg | 83  | 14 | 101 | 12 | 83  | 104 | 8  | 119 | 6  | 89  |
| average overall  |     | 77  | 15 | 92  | 12 | 83  | 92  | 8  | 104 | 7  | 89  |

| RA %   | RA RSD % | SSE %  | SSE RSD % | RE %  |
|--------|----------|--------|-----------|-------|
| 70-120 | <20      | 80-120 | <20       | >85   |
| <70    | 20-25    | <80    | 20-25     | 70-85 |
| >120   | >25      | >120   | >25       | <70   |

RA     apparent recovery  
SSE    signal suppression enhancement  
RE     extraction efficiency  
RSD    relative standard deviation

Work Sheet 7 - t-test & F-test statistics

| t-Test: paired two sample for means |              |                  |                 |                |          |           |          |            |               |                   |
|-------------------------------------|--------------|------------------|-----------------|----------------|----------|-----------|----------|------------|---------------|-------------------|
|                                     |              | <i>mean in %</i> | <i>variance</i> | <i>Pearson</i> | <i>n</i> | <i>df</i> | $\alpha$ | $P_{T<=t}$ | <i>t-stat</i> | <i>t critical</i> |
| Cattle feed                         | <b>real</b>  | 79.4             | 1305            | 0.987          | 100      | 99        | 0.05     | 0.270      | 0.616         | 1.66              |
|                                     | <b>model</b> | 79.0             | 1295            |                |          |           |          |            |               |                   |
| Pig feed                            | <b>real</b>  | 88.5             | 1159            | 0.990          | 100      | 99        | 0.05     | 0.186      | 0.898         | 1.66              |
|                                     | <b>model</b> | 88.0             | 1291            |                |          |           |          |            |               |                   |
| Chicken feed                        | <b>real</b>  | 89.0             | 1823            | 0.992          | 100      | 99        | 0.05     | 0.055      | 1.611         | 1.66              |
|                                     | <b>model</b> | 88.1             | 1784            |                |          |           |          |            |               |                   |

| F-test statistics: two sample for variances |              |                  |                 |          |           |          |            |          |                   |          |
|---------------------------------------------|--------------|------------------|-----------------|----------|-----------|----------|------------|----------|-------------------|----------|
|                                             |              | <i>mean in %</i> | <i>variance</i> | <i>n</i> | <i>df</i> | $\alpha$ | $P_{F<=f}$ | <i>F</i> | <i>F-critical</i> | <i>p</i> |
| Cattle feed                                 | <b>real</b>  | 16.4             | 60              | 100      | 99        | 0.05     | 6.78E-12   | 4.120    | 1.394             | ***      |
|                                             | <b>model</b> | 7.0              | 14.0            | 100      |           |          |            |          |                   |          |
| Pig feed                                    | <b>real</b>  | 12.5             | 33.3            | 100      | 99        | 0.05     | 7.37E-06   | 2.428    | 1.394             | ***      |
|                                             | <b>model</b> | 6.8              | 13.7            | 100      |           |          |            |          |                   |          |
| Chicken feed                                | <b>real</b>  | 10.4             | 22.2            | 100      | 99        | 0.05     | 1.74E-02   | 1.532    | 1.394             | *        |
|                                             | <b>model</b> | 7.4              | 14.0            | 100      |           |          |            |          |                   |          |

## Work Sheet 8 - RSD Extraction

|                            | Maize    | Barley   | Rapeseed | Wheat Bran | Alfalfa  | Silage   | DDGS     | Triticale |
|----------------------------|----------|----------|----------|------------|----------|----------|----------|-----------|
|                            | RSD in % | RSD in % | RSD in % | RSD in %   | RSD in % | RSD in % | RSD in % | RSD in %  |
| 15-Acetyldeoxynivalenol    | 14,2     | 15,3     | 23,3     | 8,8        | 12,9     | 21,9     | 24,7     | 8,6       |
| 15-Hydroxyculmorin         | 7,2      | 12,1     | 10,6     | 10,7       | 11,1     | 10,2     | 4,7      | 3,0       |
| 3-Acetyldeoxynivalenol     | 23,3     | 7,7      | 14,8     | 6,3        | 14,3     | 22,0     | 28,8     | 3,2       |
| 3-Methylsterigmatocystin   | 4,7      | 1,9      | 5,2      | 2,8        | 3,6      | 5,0      | 3,4      | 3,2       |
| 3-Nitropropionic Acid      | 6,4      | 4,7      | 14,6     | 14,9       | 7,0      | 13,4     | 7,0      | 4,7       |
| Aflatoxin B1               | 22,9     | 7,8      | 18,3     | 10,6       | 23,2     | 25,4     | 19,7     | 9,9       |
| Aflatoxin B2               | 9,8      | 5,9      | 16,3     | 8,7        | 24,7     | 24,7     | 6,5      | 5,5       |
| Aflatoxin G1               | 12,6     | 13,5     | 13,2     | 13,9       | 24,1     | 30,7     | 5,0      | 5,1       |
| Aflatoxin G2               | 8,1      | 15,7     | 23,1     | 29,4       | 20,0     | 28,3     | 21,2     | 8,0       |
| Aflatoxin M1               | 7,6      | 4,0      | 5,1      | 4,6        | 4,2      | 10,3     | 7,4      | 3,8       |
| Agistatin E                | 10,4     | 11,6     | 11,7     | 23,4       | 14,7     | 11,3     | 11,2     | 5,9       |
| alpha-Zearalenol           | 7,4      | 6,7      | 8,2      | 6,2        | 11,4     | 12,2     | 12,8     | 1,5       |
| Alternariol                | 12,5     | 13,0     | 10,7     | 17,9       | 11,1     | 11,9     | 8,5      | 3,5       |
| Alternariolmonomethylether | 5,0      | 8,4      | 5,4      | 3,4        | 17,0     | 20,2     | 3,4      | 3,7       |
| Altersetin                 | 18,3     | 9,8      | 31,6     | 35,1       | 21,7     | 16,5     | 8,3      | 10,0      |
| Altetoxin-I                | 5,2      | 5,1      | 5,0      | 6,1        | 11,0     | 13,5     | 6,4      | 6,5       |
| Amidepsin B                | 13,1     | 10,2     | 7,7      | 7,1        | 15,3     | 15,6     | 9,7      | 9,7       |
| Andrastin A                | 11,9     | 4,6      | 4,0      | 4,2        | 5,1      | 15,6     | 2,7      | 3,5       |
| Anisomycin                 | 10,8     | 4,8      | 7,3      | 2,7        | 7,5      | 12,3     | 5,1      | 2,8       |
| Asperphenamate             | 20,4     | 21,6     | 5,5      | 27,3       | 28,7     | 16,3     | 28,0     | 16,4      |
| Aspon                      | 13,1     | 6,9      | 9,0      | 8,1        | 1,7      | 2,1      | 4,6      | 7,9       |
| Atpenin                    | 5,9      | 3,1      | 5,7      | 3,7        | 5,8      | 4,3      | 5,7      | 4,5       |
| Averantin                  | 13,3     | 6,8      | 17,2     | 4,4        | 6,0      | 6,4      | 14,1     | 7,3       |
| Averufin                   | 23,5     | 6,7      | 10,8     | 3,7        | 10,1     | 14,2     | 11,1     | 6,4       |
| Bentazon                   | 10,2     | 3,9      | 6,2      | 8,7        | 17,9     | 6,2      | 2,9      | 6,8       |
| Brevianamid F              | 12,8     | 13,8     | 32,0     | 21,4       | 20,5     | 28,5     | 56,3     | 5,8       |
| Carprofen                  | 11,3     | 6,4      | 5,2      | 9,0        | 10,1     | 14,6     | 7,7      | 9,2       |
| Cercosporamide             | 9,5      | 7,4      | 13,1     | 7,8        | 41,8     | 7,6      | 10,9     | 3,1       |
| Chetomin                   | 9,7      | 9,1      | 12,5     | 19,3       | 7,3      | 4,7      | 11,8     | 10,7      |
| Chloramphenicol            | 5,7      | 4,0      | 5,4      | 3,1        | 3,1      | 6,5      | 4,0      | 3,4       |
| Cladosporin                | 10,5     | 2,9      | 8,0      | 3,1        | 38,9     | 14,4     | 7,0      | 7,1       |
| Curvularin                 | 2,6      | 36,1     | 13,0     | 6,2        | 2,3      | 8,8      | 4,8      | 4,3       |
| Cyclopenin                 | 8,7      | 7,3      | 10,9     | 6,8        | 5,8      | 7,9      | 4,1      | 3,5       |
| Cylindrocarpon A4          | 8,3      | 4,1      | 6,1      | 3,7        | 8,6      | 2,8      | 5,8      | 1,6       |
| Cyromazin                  | 7,6      | 3,0      | 10,8     | 14,4       | 10,5     | 5,1      | 6,5      | 1,2       |
| Cytochalasin B             | 12,2     | 8,9      | 3,3      | 5,8        | 8,1      | 21,6     | 12,9     | 6,9       |
| Cytochalasin J             | 13,0     | 12,6     | 16,4     | 18,0       | 4,6      | 10,2     | 6,8      | 4,9       |
| Deoxynivalenol             | 35,9     | 3,2      | 36,0     | 22,9       | 2,6      | 20,0     | 15,0     | 0,7       |
| Destruxin A                | 4,1      | 4,2      | 7,3      | 7,9        | 5,8      | 9,0      | 7,4      | 3,8       |
| Diacetoxyscirpenol         | 6,6      | 4,7      | 4,6      | 2,2        | 6,1      | 4,6      | 3,4      | 1,7       |
| Dihydrocitrinone           | 10,9     | 2,7      | 4,4      | 7,1        | 6,7      | 11,4     | 7,8      | 4,0       |
| Dinoseb                    | 12,6     | 4,3      | 7,1      | 7,8        | 4,5      | 5,7      | 6,6      | 8,1       |
| Dithiopyr                  | 9,3      | 5,4      | 12,2     | 11,6       | 6,0      | 8,8      | 8,0      | 3,0       |
| Emodin                     | 11,7     | 16,5     | 10,7     | 7,1        | 17,0     | 15,9     | 2,7      | 8,5       |
| Enniatin A1                | 13,4     | 9,6      | 17,6     | 19,4       | 4,7      | 24,9     | 20,4     | 1,6       |
| Equisetin                  | 37,0     | 4,1      | 21,1     | 5,3        | 6,5      | 7,9      | 14,4     | 2,0       |
| Ergine                     | 9,8      | 4,8      | 28,2     | 11,9       | 15,8     | 7,6      | 12,6     | 4,0       |
| Ergocristine               | 12,4     | 13,1     | 20,0     | 26,8       | 16,8     | 13,8     | 4,7      | 6,0       |
| Ethirimol                  | 9,5      | 4,6      | 6,9      | 10,7       | 2,7      | 8,1      | 4,8      | 4,3       |
| Florfenicol                | 5,6      | 8,5      | 4,2      | 4,4        | 2,9      | 6,9      | 6,0      | 7,8       |
| Fluazinam                  | 12,8     | 3,5      | 9,2      | 6,5        | 3,3      | 4,3      | 4,5      | 5,8       |
| Flumethasone               | 13,3     | 10,7     | 10,0     | 6,4        | 17,1     | 7,0      | 4,6      | 7,4       |
| Fumigaclavine C            | 7,2      | 6,1      | 10,0     | 7,4        | 9,4      | 8,1      | 6,9      | 2,1       |
| Fumiquinazolin A           | 13,7     | 9,5      | 4,9      | 11,2       | 3,7      | 11,9     | 4,0      | 2,2       |
| Fumonisin B1               | 20,4     | 21,4     | 25,0     | 45,9       | 36,8     | 15,3     | 53,5     | 18,6      |

|                      |      |      |      |      |      |      |      |      |
|----------------------|------|------|------|------|------|------|------|------|
| Fumonisin B2         | 15,4 | 20,4 | 16,9 | 42,0 | 44,5 | 9,2  | 11,1 | 16,8 |
| Fungerin             | 17,6 | 7,9  | 10,0 | 5,4  | 11,9 | 14,7 | 14,3 | 5,8  |
| Fusarenon X          | 11,4 | 7,7  | 8,3  | 20,5 | 11,8 | 21,9 | 4,7  | 8,0  |
| Gibberellic Acid     | 5,1  | 3,6  | 8,0  | 19,4 | 5,7  | 9,2  | 7,7  | 3,8  |
| Gliotoxin            | 31,7 | 13,8 | 16,8 | 16,5 | 26,8 | 14,0 | 15,8 | 15,7 |
| Griseofulvin         | 3,5  | 1,5  | 11,8 | 4,5  | 11,4 | 6,4  | 6,0  | 3,4  |
| Herquline A          | 6,3  | 4,2  | 19,1 | 7,6  | 6,3  | 17,4 | 11,0 | 7,1  |
| HT-2 Toxin           | 31,3 | 18,4 | 24,7 | 30,3 | 23,5 | 22,7 | 20,0 | 17,3 |
| Illicicolin A        | 21,8 | 7,3  | 8,5  | 9,7  | 15,6 | 4,2  | 6,9  | 2,1  |
| Lotaustralin         | 5,9  | 22,4 | 7,5  | 13,8 | 39,4 | 32,6 | 3,9  | 2,2  |
| Macrosporin          | 6,3  | 4,8  | 5,1  | 4,6  | 12,7 | 11,2 | 4,7  | 2,1  |
| Malformin C          | 13,8 | 7,0  | 6,1  | 7,1  | 8,9  | 9,0  | 3,4  | 7,6  |
| Mefenamic Acid       | 11,4 | 8,1  | 12,1 | 4,9  | 4,6  | 4,6  | 6,7  | 5,8  |
| Meleagrín            | 15,6 | 13,5 | 13,8 | 13,0 | 17,2 | 18,9 | 31,8 | 5,4  |
| Moniliformin         | 7,2  | 6,2  | 13,1 | 18,7 | 16,0 | 8,5  | 21,7 | 13,4 |
| Monoacetoxyscirpenol | 13,8 | 11,8 | 10,1 | 10,4 | 47,4 | 16,6 | 17,7 | 2,5  |
| Mycophenolic acid    | 6,2  | 7,0  | 6,1  | 5,8  | 8,0  | 7,2  | 3,1  | 6,6  |
| Neosolaniol          | 18,4 | 3,8  | 8,3  | 4,5  | 4,4  | 4,6  | 6,0  | 1,7  |
| Nivalenol            | 6,7  | 26,1 | 5,4  | 19,6 | 3,8  | 15,6 | 5,8  | 0,8  |
| Norsolorinic Acid    | 26,1 | 13,9 | 11,2 | 15,3 | 26,5 | 8,8  | 6,6  | 3,3  |
| Novaluron            | 10,6 | 5,8  | 9,9  | 9,5  | 15,7 | 7,3  | 2,9  | 3,9  |
| Ochratoxin A         | 8,7  | 7,4  | 10,4 | 14,0 | 11,4 | 11,0 | 8,7  | 3,3  |
| Ochratoxin B         | 8,5  | 4,1  | 7,8  | 12,5 | 8,9  | 10,2 | 5,7  | 4,4  |
| Penitrem A           | 13,3 | 6,1  | 2,6  | 5,5  | 12,3 | 5,6  | 15,5 | 2,5  |
| Permethrin           | 13,7 | 8,0  | 13,8 | 5,5  | 8,2  | 9,2  | 7,3  | 7,0  |
| Phomalone            | 10,0 | 2,7  | 10,2 | 9,2  | 13,7 | 5,8  | 4,1  | 4,7  |
| Pinselin             | 5,4  | 8,0  | 10,0 | 4,1  | 19,7 | 16,5 | 3,9  | 4,9  |
| Prometon             | 12,5 | 4,7  | 4,7  | 3,0  | 2,9  | 3,9  | 4,8  | 4,1  |
| Pseurotin A          | 8,1  | 8,3  | 5,7  | 4,3  | 4,7  | 11,6 | 11,0 | 7,1  |
| Questiomycin A       | 4,3  | 4,9  | 5,3  | 5,6  | 6,2  | 4,3  | 6,5  | 3,5  |
| Quinolactacin A      | 5,8  | 2,7  | 3,5  | 10,1 | 3,3  | 3,4  | 5,4  | 2,1  |
| Rofecoxib            | 20,6 | 8,8  | 4,3  | 15,3 | 12,2 | 17,8 | 7,5  | 8,4  |
| Roquefortine C       | 13,4 | 6,8  | 10,6 | 12,3 | 12,5 | 20,2 | 9,1  | 9,6  |
| Secalonic Acid D     | 5,6  | 1,2  | 7,4  | 4,9  | 15,8 | 11,1 | 5,0  | 5,6  |
| Sterigmatocystin     | 11,0 | 4,3  | 9,3  | 4,0  | 32,3 | 23,3 | 7,6  | 6,4  |
| Sulfamethoxazole     | 11,8 | 4,2  | 6,3  | 7,1  | 6,8  | 9,2  | 12,0 | 7,8  |
| Sulfoxaflo           | 7,6  | 3,6  | 5,5  | 6,1  | 4,3  | 8,8  | 6,1  | 6,6  |
| Sulochrin            | 2,5  | 5,4  | 3,4  | 2,3  | 1,6  | 5,0  | 3,5  | 5,5  |
| T-2 Toxin            | 14,2 | 5,2  | 6,4  | 3,6  | 11,2 | 12,3 | 4,2  | 4,5  |
| Ternatin             | 11,7 | 5,8  | 11,2 | 5,5  | 28,2 | 9,8  | 11,1 | 4,1  |
| Thielavin B          | 10,1 | 7,6  | 14,6 | 10,5 | 11,1 | 5,4  | 14,2 | 7,7  |
| Tiamulin             | 8,6  | 5,3  | 8,1  | 6,6  | 4,0  | 5,6  | 7,3  | 4,7  |
| Tilimicosin          | 12,3 | 13,6 | 29,2 | 14,3 | 25,9 | 14,7 | 12,7 | 9,6  |
| Versicolorin A       | 6,3  | 10,7 | 11,6 | 12,2 | 8,5  | 3,9  | 8,8  | 5,2  |
| Zearalenon           | 9,6  | 4,4  | 8,7  | 6,1  | 12,2 | 11,2 | 20,1 | 4,9  |

| RE RSD % |
|----------|
| <20      |
| 20-25    |
| >25      |

RE extraction efficiency  
RSD relative standard deviation

|                            | Wheat    | Sunflower | Soy      | Horsebean | Cattle model | Pig model | Chicken model |
|----------------------------|----------|-----------|----------|-----------|--------------|-----------|---------------|
|                            | RSD in % | RSD in %  | RSD in % | RSD in %  | RSD in %     | RSD in %  | RSD in %      |
| 15-Acetyldeoxynivalenol    | 20,5     | 24,7      | 14,0     | 11,9      | 11,3         | 11,8      | 18,0          |
| 15-Hydroxyculmorin         | 7,7      | 8,2       | 3,8      | 7,7       | 7,2          | 9,1       | 13,1          |
| 3-Acetyldeoxynivalenol     | 12,2     | 7,2       | 20,6     | 12,0      | 10,3         | 16,3      | 24,1          |
| 3-Methylsterigmatocystin   | 4,5      | 5,3       | 2,9      | 4,7       | 3,4          | 2,0       | 5,4           |
| 3-Nitropropionic Acid      | 12,0     | 4,2       | 14,1     | 4,2       | 3,2          | 8,9       | 12,7          |
| Aflatoxin B1               | 6,4      | 15,8      | 17,7     | 10,2      | 4,4          | 15,2      | 11,3          |
| Aflatoxin B2               | 8,7      | 22,3      | 12,0     | 13,1      | 18,3         | 10,9      | 8,1           |
| Aflatoxin G1               | 7,6      | 19,9      | 12,9     | 5,8       | 6,3          | 9,2       | 8,7           |
| Aflatoxin G2               | 12,9     | 11,7      | 16,4     | 19,9      | 14,1         | 20,2      | 4,8           |
| Aflatoxin M1               | 5,8      | 8,9       | 5,3      | 6,8       | 5,8          | 7,8       | 7,6           |
| Agistatin E                | 5,1      | 13,2      | 7,9      | 4,2       | 5,5          | 6,0       | 9,6           |
| alpha-Zearalenol           | 7,7      | 6,7       | 6,9      | 3,5       | 6,2          | 3,8       | 12,7          |
| Alternariol                | 13,6     | 18,8      | 17,6     | 5,2       | 10,5         | 9,7       | 9,6           |
| Alternariolmonomethylether | 6,7      | 22,3      | 5,0      | 2,7       | 9,6          | 3,9       | 3,9           |
| Altersetin                 | 13,6     | 12,9      | 12,6     | 10,2      | 12,4         | 4,5       | 8,0           |
| Altetoxin-I                | 8,2      | 4,7       | 4,6      | 4,1       | 2,0          | 4,7       | 5,2           |
| Amidepsin B                | 13,9     | 11,4      | 15,7     | 6,1       | 11,1         | 12,7      | 15,0          |
| Andrastin A                | 4,5      | 3,4       | 14,2     | 3,4       | 4,7          | 3,9       | 8,0           |
| Anisomycin                 | 5,8      | 2,0       | 3,3      | 2,6       | 4,3          | 10,2      | 20,9          |
| Asperphenamate             | 11,4     | 9,8       | 35,1     | 7,7       | 7,6          | 16,6      | 17,5          |
| Aspon                      | 5,6      | 8,1       | 7,7      | 3,7       | 5,7          | 5,1       | 5,9           |
| Atpenin                    | 4,4      | 8,2       | 17,1     | 5,2       | 3,2          | 6,3       | 6,9           |
| Averantin                  | 4,5      | 7,3       | 14,8     | 10,7      | 14,7         | 4,3       | 13,9          |
| Averufin                   | 6,1      | 11,4      | 17,4     | 5,5       | 4,6          | 3,1       | 9,9           |
| Bentazon                   | 4,7      | 4,6       | 5,3      | 4,6       | 2,2          | 5,4       | 3,8           |
| Brevianamid F              | 8,8      | 8,9       | 42,4     | 5,4       | 12,6         | 14,0      | 7,3           |
| Carprofen                  | 10,0     | 12,3      | 9,7      | 8,5       | 6,9          | 8,9       | 11,0          |
| Cercosporamide             | 3,3      | 2,0       | 8,1      | 3,6       | 7,5          | 8,1       | 5,1           |
| Chetomin                   | 10,4     | 4,1       | 23,6     | 10,7      | 10,7         | 4,2       | 10,3          |
| Chloramphenicol            | 3,1      | 35,9      | 7,4      | 2,8       | 3,5          | 6,2       | 11,2          |
| Cladosporin                | 8,7      | 4,3       | 6,4      | 3,9       | 7,3          | 10,1      | 6,9           |
| Curvularin                 | 18,9     | 5,7       | 6,8      | 4,7       | 2,7          | 3,8       | 5,3           |
| Cyclopenin                 | 6,9      | 8,9       | 7,2      | 1,9       | 3,5          | 6,9       | 5,0           |
| Cylindrocarpon A4          | 3,2      | 9,7       | 10,7     | 2,0       | 1,8          | 2,4       | 5,9           |
| Cyromazin                  | 7,3      | 7,4       | 5,3      | 4,6       | 3,8          | 8,6       | 8,2           |
| Cytochalasin B             | 10,4     | 3,8       | 9,7      | 12,2      | 6,4          | 6,1       | 6,4           |
| Cytochalasin J             | 7,2      | 9,4       | 9,9      | 5,6       | 9,7          | 6,8       | 12,7          |
| Deoxynivalenol             | 11,5     | 27,7      | 10,7     | 7,8       | 7,7          | 13,4      | 15,2          |
| Destruxin A                | 3,8      | 6,5       | 3,2      | 6,0       | 5,5          | 4,1       | 1,9           |
| Diacetoxyscirpenol         | 3,3      | 6,4       | 4,8      | 2,5       | 4,8          | 4,9       | 6,4           |
| Dihydrocitrinone           | 9,9      | 13,4      | 6,2      | 7,8       | 4,4          | 7,2       | 5,1           |
| Dinoseb                    | 7,5      | 6,3       | 6,7      | 2,6       | 1,8          | 4,5       | 5,6           |
| Dithiopyr                  | 6,3      | 14,4      | 11,0     | 5,5       | 6,4          | 6,4       | 12,7          |
| Emodin                     | 16,9     | 8,3       | 11,1     | 5,4       | 7,7          | 12,3      | 4,7           |
| Enniatin A1                | 12,0     | 12,1      | 8,9      | 7,7       | 9,8          | 8,7       | 12,2          |
| Equisetin                  | 8,9      | 7,8       | 12,2     | 7,9       | 4,1          | 5,3       | 9,2           |
| Ergine                     | 16,3     | 17,7      | 11,0     | 2,2       | 14,0         | 11,0      | 19,4          |
| Ergocristine               | 25,1     | 12,6      | 18,2     | 18,4      | 15,7         | 5,4       | 11,8          |
| Ethirimol                  | 5,3      | 14,4      | 6,6      | 8,1       | 2,6          | 6,1       | 6,3           |
| Florfenicol                | 4,0      | 8,1       | 8,3      | 7,4       | 6,5          | 4,9       | 13,9          |
| Fluazinam                  | 5,2      | 8,6       | 6,6      | 9,4       | 3,2          | 1,2       | 4,4           |
| Flumethasone               | 8,6      | 16,5      | 6,2      | 7,2       | 8,2          | 9,4       | 6,3           |
| Fumigaclavine C            | 2,7      | 11,5      | 8,8      | 6,0       | 38,1         | 7,7       | 2,3           |
| Fumiquinazolin A           | 16,1     | 7,8       | 16,4     | 10,0      | 9,1          | 13,0      | 8,7           |
| Fumonisin B1               | 22,9     | 15,6      | 8,6      | 8,3       | 7,8          | 10,7      | 14,5          |

|                      |      |      |      |      |      |      |      |
|----------------------|------|------|------|------|------|------|------|
| Fumonisin B2         | 13,3 | 17,7 | 5,6  | 10,1 | 5,4  | 12,6 | 8,2  |
| Fungerin             | 12,6 | 12,5 | 3,8  | 8,1  | 12,3 | 8,0  | 7,5  |
| Fusarenon X          | 14,9 | 5,9  | 6,8  | 8,0  | 10,4 | 7,6  | 9,8  |
| Gibberellic Acid     | 5,1  | 5,1  | 8,7  | 3,6  | 4,1  | 4,5  | 3,4  |
| Gliotoxin            | 7,0  | 12,3 | 29,0 | 15,6 | 6,9  | 6,9  | 15,6 |
| Griseofulvin         | 5,9  | 4,0  | 9,7  | 4,1  | 3,1  | 6,1  | 6,1  |
| Herquiline A         | 13,5 | 8,4  | 10,5 | 8,7  | 10,1 | 5,3  | 13,8 |
| HT-2 Toxin           | 32,8 | 31,3 | 31,2 | 28,0 | 9,2  | 14,0 | 6,1  |
| Illicicolin A        | 6,7  | 9,5  | 19,4 | 12,5 | 22,0 | 12,5 | 5,1  |
| Lotaustralin         | 5,8  | 5,1  | 3,3  | 3,6  | 9,3  | 3,3  | 6,4  |
| Macrosporin          | 4,2  | 4,3  | 16,3 | 4,7  | 3,6  | 6,8  | 8,6  |
| Malformin C          | 7,3  | 8,8  | 19,0 | 7,0  | 6,0  | 5,8  | 6,5  |
| Mefenamic Acid       | 7,7  | 7,9  | 10,2 | 5,0  | 6,8  | 6,1  | 7,6  |
| Meleagrín            | 9,8  | 23,7 | 11,6 | 12,1 | 12,3 | 7,2  | 10,4 |
| Moniliformin         | 11,6 | 9,9  | 4,0  | 1,8  | 2,2  | 10,8 | 11,4 |
| Monoacetoxyscirpenol | 8,6  | 7,9  | 26,2 | 8,4  | 13,7 | 12,6 | 10,2 |
| Mycophenolic acid    | 6,7  | 6,5  | 6,0  | 4,0  | 8,6  | 4,7  | 14,4 |
| Neosolaniol          | 3,3  | 8,2  | 6,6  | 2,9  | 8,3  | 11,8 | 17,2 |
| Nivalenol            | 12,8 | 6,7  | 9,3  | 3,5  | 5,3  | 3,7  | 6,8  |
| Norsolorinic Acid    | 4,5  | 14,7 | 15,2 | 15,5 | 3,4  | 6,8  | 13,3 |
| Novaluron            | 8,0  | 3,7  | 8,3  | 7,2  | 6,3  | 7,6  | 9,2  |
| Ochratoxin A         | 4,9  | 24,2 | 10,5 | 2,9  | 6,2  | 4,4  | 3,0  |
| Ochratoxin B         | 4,7  | 28,0 | 8,8  | 4,3  | 7,8  | 5,0  | 5,4  |
| Penitrem A           | 4,6  | 6,7  | 6,4  | 18,1 | 20,3 | 7,0  | 1,5  |
| Permethrin           | 9,5  | 13,7 | 9,8  | 3,7  | 12,7 | 8,8  | 9,8  |
| Phomalone            | 11,8 | 9,3  | 6,5  | 6,4  | 5,6  | 5,2  | 6,3  |
| Pinselin             | 6,7  | 8,8  | 4,5  | 6,3  | 16,5 | 9,7  | 8,4  |
| Prometon             | 5,8  | 7,3  | 4,1  | 4,1  | 1,9  | 2,4  | 4,1  |
| Pseurotin A          | 13,2 | 14,3 | 9,8  | 6,8  | 6,7  | 14,7 | 8,3  |
| Questiomycin A       | 4,5  | 4,5  | 2,2  | 3,0  | 7,3  | 12,6 | 12,7 |
| Quinolactacin A      | 5,6  | 16,5 | 8,0  | 2,4  | 3,4  | 5,8  | 9,7  |
| Rofecoxib            | 9,5  | 16,9 | 10,9 | 8,3  | 10,6 | 11,4 | 6,9  |
| Roquefortine C       | 12,7 | 14,2 | 5,8  | 4,5  | 14,3 | 12,6 | 11,1 |
| Secalonic Acid D     | 4,6  | 5,5  | 5,7  | 2,4  | 7,4  | 5,6  | 9,0  |
| Sterigmatocystin     | 13,4 | 5,8  | 14,8 | 3,3  | 6,7  | 10,4 | 6,3  |
| Sulfamethoxazole     | 6,8  | 8,0  | 12,0 | 8,0  | 9,4  | 4,4  | 15,6 |
| Sulfoxaflor          | 5,4  | 8,8  | 5,5  | 6,0  | 2,7  | 6,1  | 13,6 |
| Sulochrin            | 4,5  | 11,1 | 5,1  | 1,5  | 3,4  | 3,4  | 5,2  |
| T-2 Toxin            | 3,8  | 8,1  | 6,7  | 5,5  | 8,6  | 4,6  | 8,3  |
| Ternatin             | 7,4  | 10,2 | 8,9  | 7,7  | 6,9  | 7,4  | 9,1  |
| Thielavin B          | 11,6 | 2,2  | 9,1  | 15,5 | 13,6 | 11,1 | 7,3  |
| Tiamulin             | 5,5  | 10,5 | 10,5 | 6,1  | 5,3  | 8,2  | 4,9  |
| Tilimicosin          | 11,8 | 10,1 | 14,7 | 11,2 | 9,3  | 5,8  | 12,6 |
| Versicolorin A       | 5,5  | 5,8  | 16,8 | 4,6  | 7,7  | 8,0  | 6,7  |
| Zearalenon           | 8,1  | 8,0  | 9,6  | 3,9  | 5,9  | 11,0 | 17,0 |

| RE RSD % |
|----------|
| <20      |
| 20-25    |
| >25      |

RE extraction efficiency  
RSD relative standard deviation

## Work Sheet 9 - single technical replicate

| Supporting Information   | RA %          | RA RSD% | SSE % | SSE RSD % | RE % |
|--------------------------|---------------|---------|-------|-----------|------|
| 15-Acetyldeoxynivalenol  | 52            | 4       | 60    | 2         | 86   |
| 15-Hydroxyculmorin       | 68            | 9       | 74    | 4         | 92   |
| 3-Acetyldeoxynivalenol   | 40            | 2       | 41    | 1         | 98   |
| 3-Methylsterigmatocystin | 38            | 8       | 41    | 2         | 92   |
| 3-Nitropropionsäure      | 41            | 2       | 56    | 2         | 74   |
| Aflatoxin B1             | 45            | 8       | 46    | 5         | 96   |
| Aflatoxin B2             | 37            | 5       | 38    | 5         | 97   |
| Aflatoxin G1             | 44            | 4       | 47    | 3         | 94   |
| Aflatoxin G2             | 42            | 9       | 43    | 6         | 98   |
| Aflatoxin M1             | 58            | 4       | 59    | 1         | 98   |
| Agistatin E              | 63            | 3       | 64    | 4         | 98   |
| alpha-Zearalenol         | 40            | 3       | 42    | 4         | 95   |
| Alternariol              | 48            | 8       | 63    | 6         | 76   |
| Alternariolmethylether   | 44            | 2       | 46    | 2         | 95   |
| Altersetin               | 387           | 7       | 265   | 2         | 146  |
| Altetoxin-I              | 40            | 5       | 41    | 3         | 100  |
| Amidepsin B              | 106           | 6       | 94    | 2         | 113  |
| Andrastin A              | 53            | 5       | 99    | 6         | 53   |
| Anisomycin               | 53            | 3       | 54    | 4         | 98   |
| Asperphenamate           | 70            | 27      | 80    | 7         | 88   |
| Aspon                    | 74            | 3       | 86    | 3         | 86   |
| Atpenin                  | not available |         |       |           |      |
| Averantin                | 78            | 4       | 91    | 6         | 86   |
| Averufin                 | 40            | 4       | 44    | 3         | 91   |
| Bentazon                 | 66            | 3       | 69    | 2         | 97   |
| Brevianamid F            | 24            | 6       | 28    | 3         | 83   |
| Carprofen                | 101           | 3       | 115   | 3         | 88   |
| Cercosporamide           | 57            | 5       | 70    | 3         | 82   |
| Chetomin                 | 31            | 7       | 50    | 4         | 61   |
| Chloramphenicol          | 37            | 7       | 40    | 2         | 91   |
| Cladosporin              | 33            | 6       | 35    | 4         | 95   |
| Curvularin               | 65            | 7       | 66    | 4         | 99   |
| Cyclopenin               | 54            | 5       | 56    | 5         | 97   |
| Cylindrocarpon A4        | 92            | 6       | 99    | 2         | 93   |
| Cyromazin                | not available |         |       |           |      |
| Cytochalasin B           | 54            | 6       | 54    | 4         | 100  |
| Cytochalasin J           | 38            | 7       | 42    | 2         | 90   |
| Deoxynivalenol           | 98            | 7       | 118   | 4         | 84   |
| Destruxin A              | 56            | 3       | 56    | 5         | 100  |
| Diacetoxyscirpenol       | 73            | 1       | 67    | 3         | 109  |
| Dihydrocitrinone         | 132           | 5       | 157   | 6         | 84   |
| Dinoseb                  | 102           | 4       | 112   | 2         | 92   |
| Dithiopyr                | 82            | 6       | 82    | 11        | 100  |
| Emodin                   | 87            | 1       | 105   | 2         | 83   |
| Enniatin A1              | 84            | 4       | 87    | 3         | 97   |
| Equisetin                | 186           | 10      | 211   | 1         | 88   |
| Ergine                   | 37            | 13      | 46    | 5         | 81   |
| Ergocristine             | 56            | 6       | 56    | 3         | 100  |
| Ethirimol                | 70            | 4       | 78    | 6         | 90   |
| Florfenicol              | not available |         |       |           |      |
| Fluazinam                | 117           | 3       | 126   | 2         | 93   |
| Flumethasone             | 70            | 3       | 80    | 7         | 87   |
| Fumigaclavine C          | 61            | 9       | 56    | 9         | 109  |
| Fumiquinazolin A         | 61            | 8       | 71    | 6         | 87   |
| Fumonisin B1             | 72            | 3       | 82    | 3         | 88   |
| Fumonisin B2             | 74            | 5       | 84    | 2         | 88   |
| Fungerin                 | 56            | 4       | 56    | 2         | 100  |

|                      |     |    |     |   |     |
|----------------------|-----|----|-----|---|-----|
| Fusarenon-X          | 98  | 3  | 147 | 3 | 67  |
| Gibberellic Acid     | 86  | 3  | 114 | 4 | 75  |
| Gliotoxin            | 55  | 8  | 64  | 6 | 86  |
| Griseofulvin         | 62  | 3  | 60  | 3 | 104 |
| Herquline A          | 56  | 4  | 63  | 4 | 88  |
| HT-2 Toxin           | 70  | 8  | 65  | 8 | 109 |
| Illicicolin A        | 37  | 7  | 58  | 9 | 63  |
| Lotaustralin         | 122 | 1  | 300 | 2 | 41  |
| Macrosporin          | 63  | 2  | 67  | 3 | 94  |
| Malformin C          | 30  | 6  | 51  | 2 | 59  |
| Mefenamic Acid       | 80  | 7  | 81  | 2 | 99  |
| Meleagrins           | 31  | 2  | 41  | 3 | 75  |
| Moniliformin         | 97  | 3  | 163 | 2 | 59  |
| Monoacetoxyscirpenol | 61  | 13 | 64  | 8 | 96  |
| Mycophenolic acid    | 78  | 12 | 72  | 4 | 108 |
| Neosolaniol          | 56  | 5  | 58  | 3 | 97  |
| Nivalenol            | 119 | 6  | 111 | 4 | 107 |
| Norsolorinic Acid    | 66  | 6  | 108 | 2 | 61  |
| Novaluron            | 87  | 13 | 98  | 4 | 89  |
| Ochratoxin A         | 82  | 3  | 88  | 5 | 93  |
| Ochratoxin B         | 43  | 2  | 41  | 4 | 104 |
| Penitrem A           | 54  | 5  | 54  | 4 | 101 |
| Permethrin           | 56  | 11 | 55  | 6 | 102 |
| Phomalone            | 46  | 4  | 46  | 4 | 100 |
| Pinselin             | 35  | 12 | 37  | 4 | 95  |
| Prometon             | 90  | 2  | 96  | 2 | 94  |
| Pseurotin A          | 50  | 8  | 46  | 5 | 110 |
| Questiomycin A       | 82  | 12 | 98  | 8 | 83  |
| Quinolactacin A      | 49  | 2  | 56  | 2 | 88  |
| Rofecoxib            | 28  | 9  | 29  | 5 | 95  |
| Roquefortine C       | 39  | 6  | 33  | 4 | 118 |
| Secalonic Acid D     | 63  | 5  | 64  | 2 | 98  |
| Sterigmatocystin     | 43  | 3  | 45  | 4 | 94  |
| Sulfamethoxazole     | 54  | 5  | 57  | 5 | 96  |
| Sulfoxaflo           | 44  | 3  | 46  | 3 | 95  |
| Sulochrin            | 40  | 7  | 41  | 4 | 99  |
| T-2 Toxin            | 61  | 4  | 61  | 9 | 100 |
| Ternatin             | 65  | 6  | 65  | 7 | 100 |
| Thielavin B          | 44  | 11 | 45  | 7 | 98  |
| Tiamulin             | 89  | 5  | 93  | 1 | 96  |
| Tilimicosin          | 138 | 6  | 121 | 6 | 114 |
| Versicolorin A       | 46  | 3  | 55  | 5 | 84  |
| Zearalenon           | 41  | 4  | 42  | 2 | 98  |

RA            apparent recovery  
 SSE          signal suppression enhancement  
 RE            extraction efficiency  
 RSD          relative standard deviation

results based on the analysis of seven technical real cattle feed replicates
